# Supplementary material
Source: PubMed Central journal article supplement (PMC2954889)

# C-H Bond Functionalization via Hydride Transfer: Synthesis of Dihydrobenzopyrans from *ortho*-Vinylaryl Alkyl Ethers

Kevin M. McQuaid, Jonathan Z. Long and Dalibor Sames\*

*Department of Chemistry, Columbia University, New York, NY 10027*

## Supporting Information

|      |                                                             |     |
|------|-------------------------------------------------------------|-----|
| I.   | General Introduction and Materials                          | S3  |
| II.  | Synthesis of Starting Materials                             | S3  |
| III. | General Procedure for Lewis Acid Catalyzed Hydride-Transfer | S17 |
| IV.  | Product Data for Dihydrobenzopyrans                         | S17 |
| V.   | NMR Spectra                                                 | S23 |

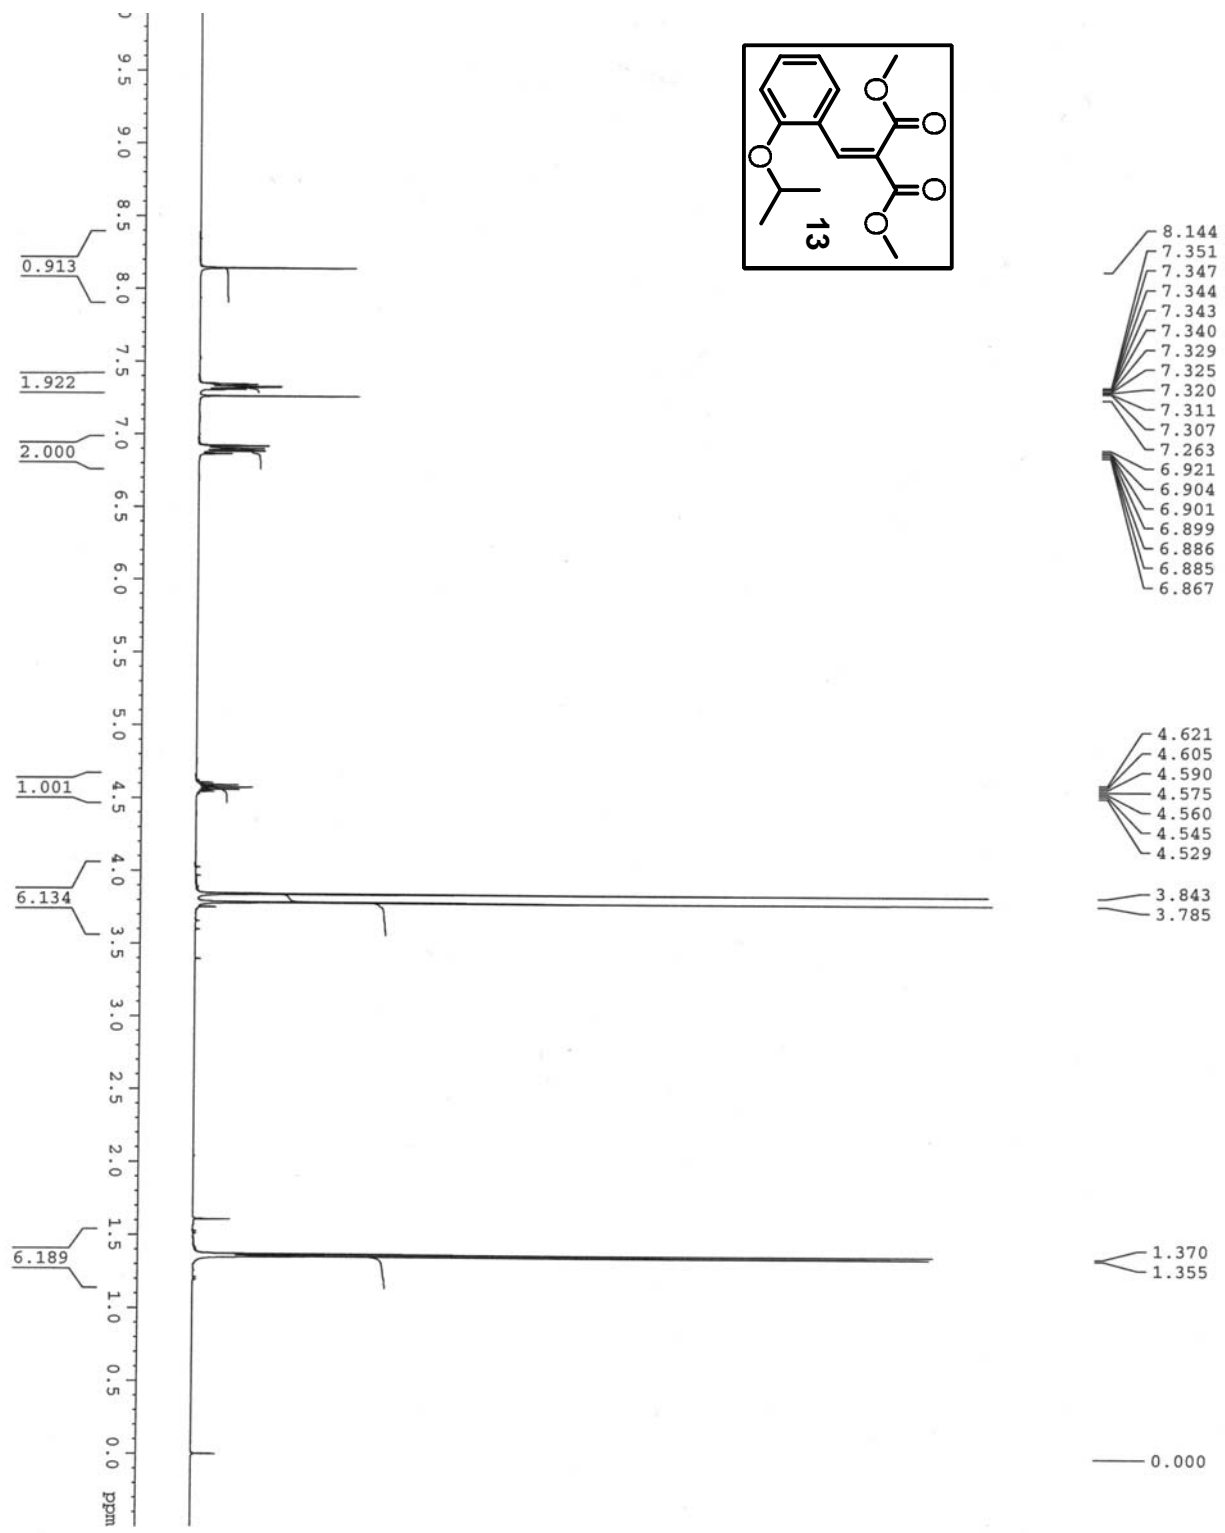

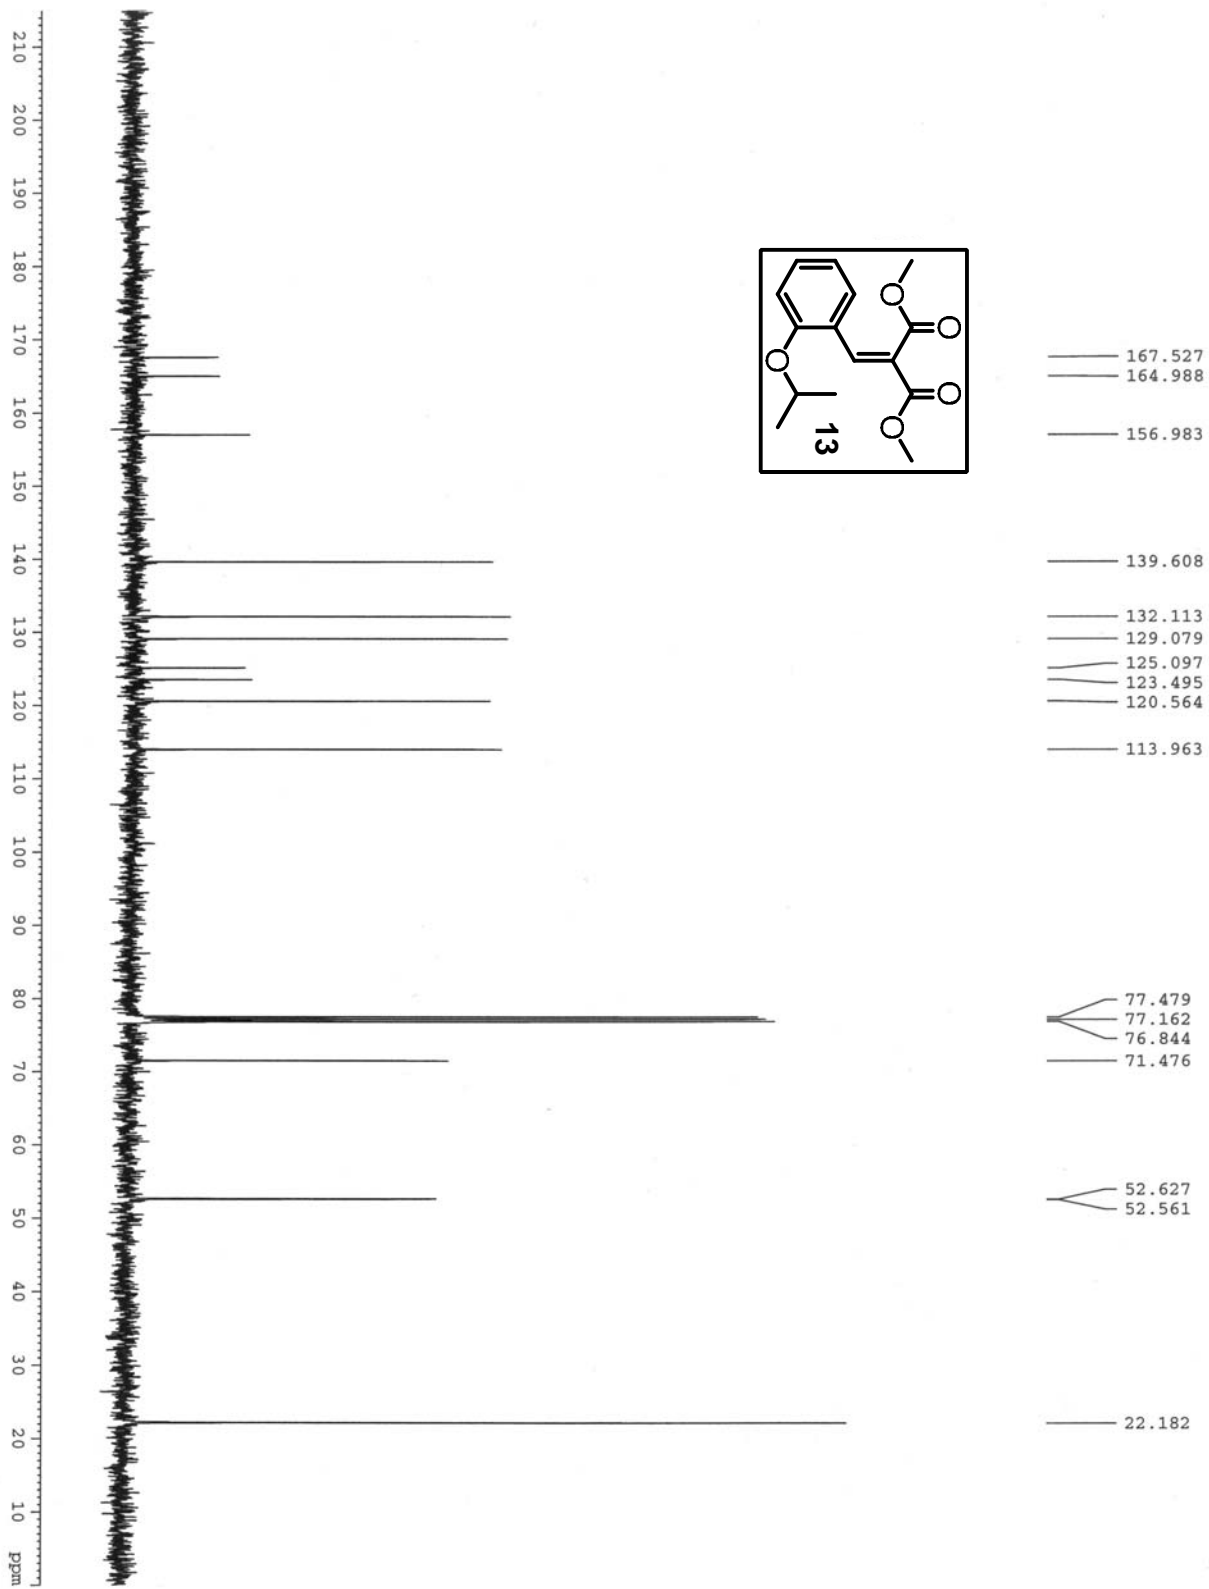

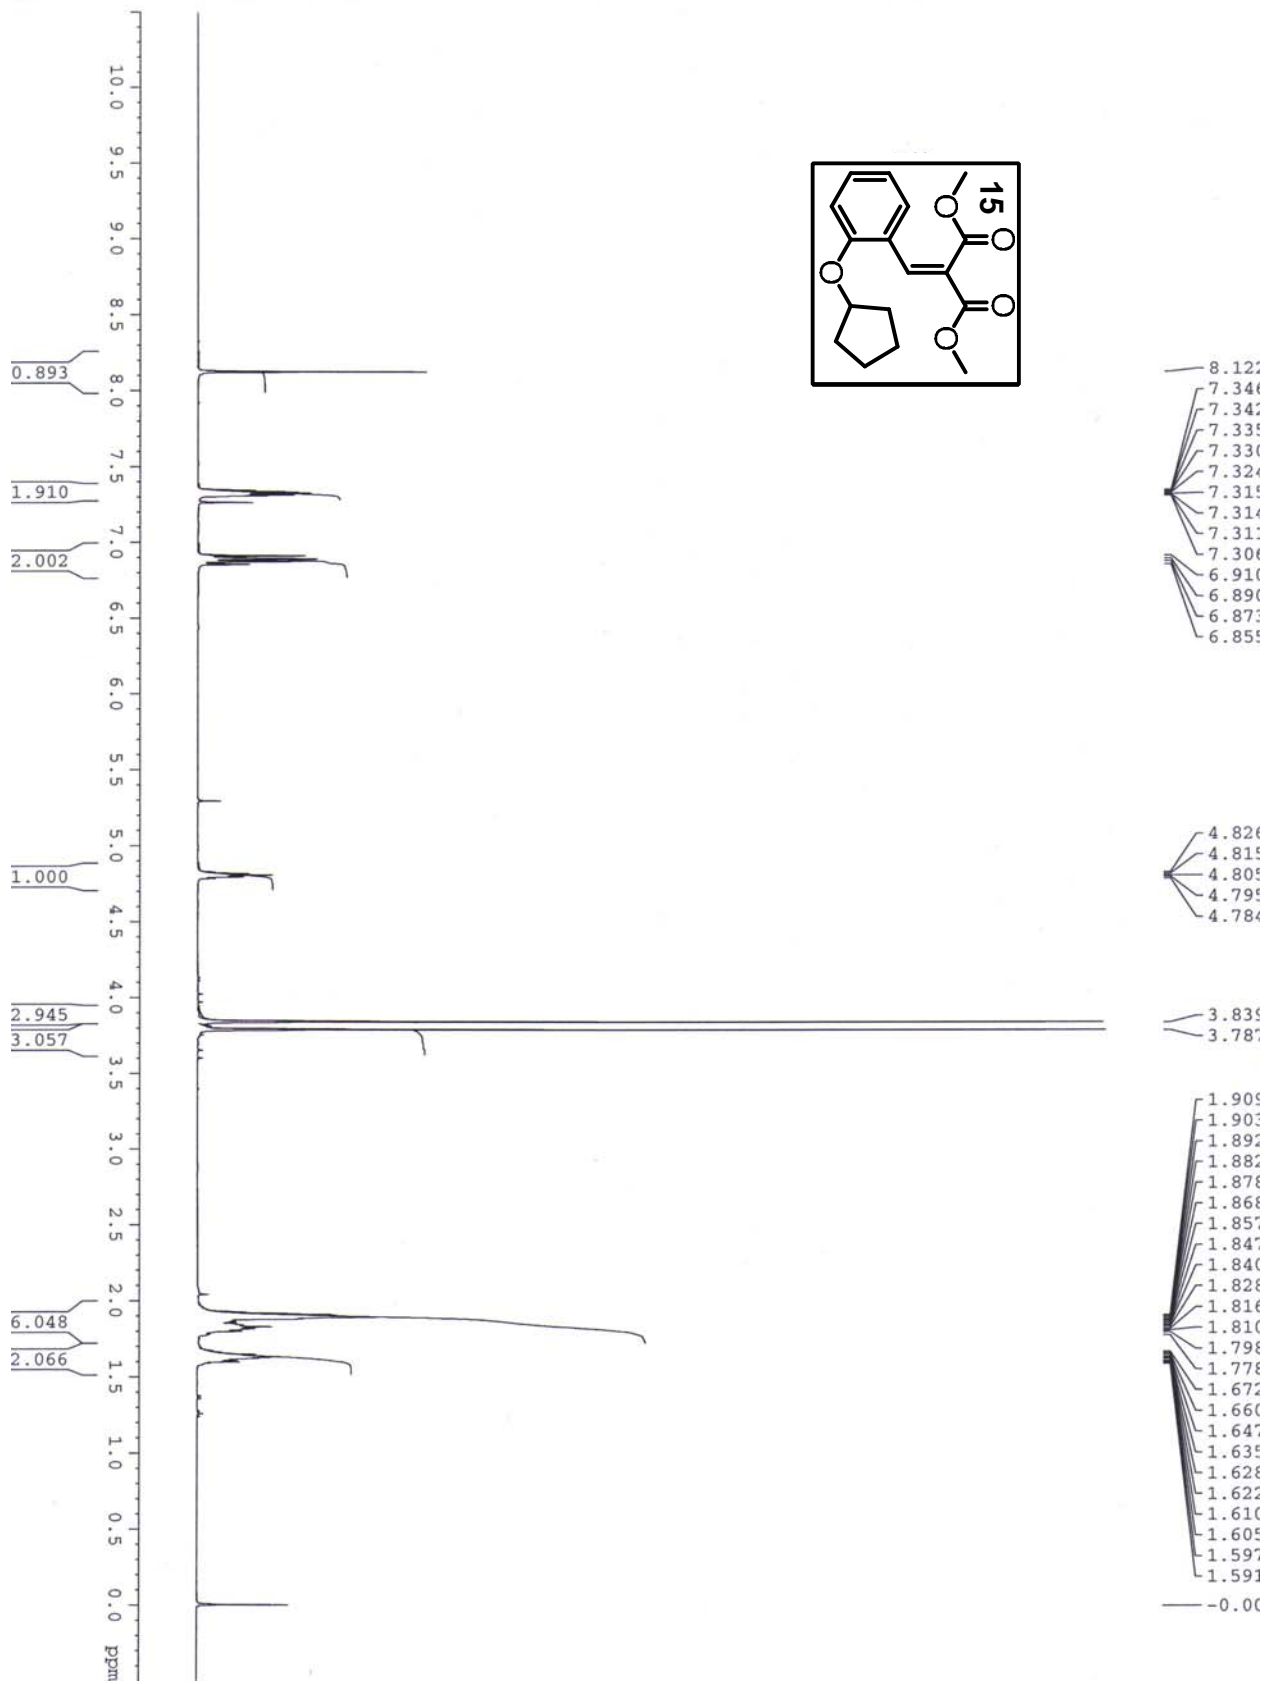

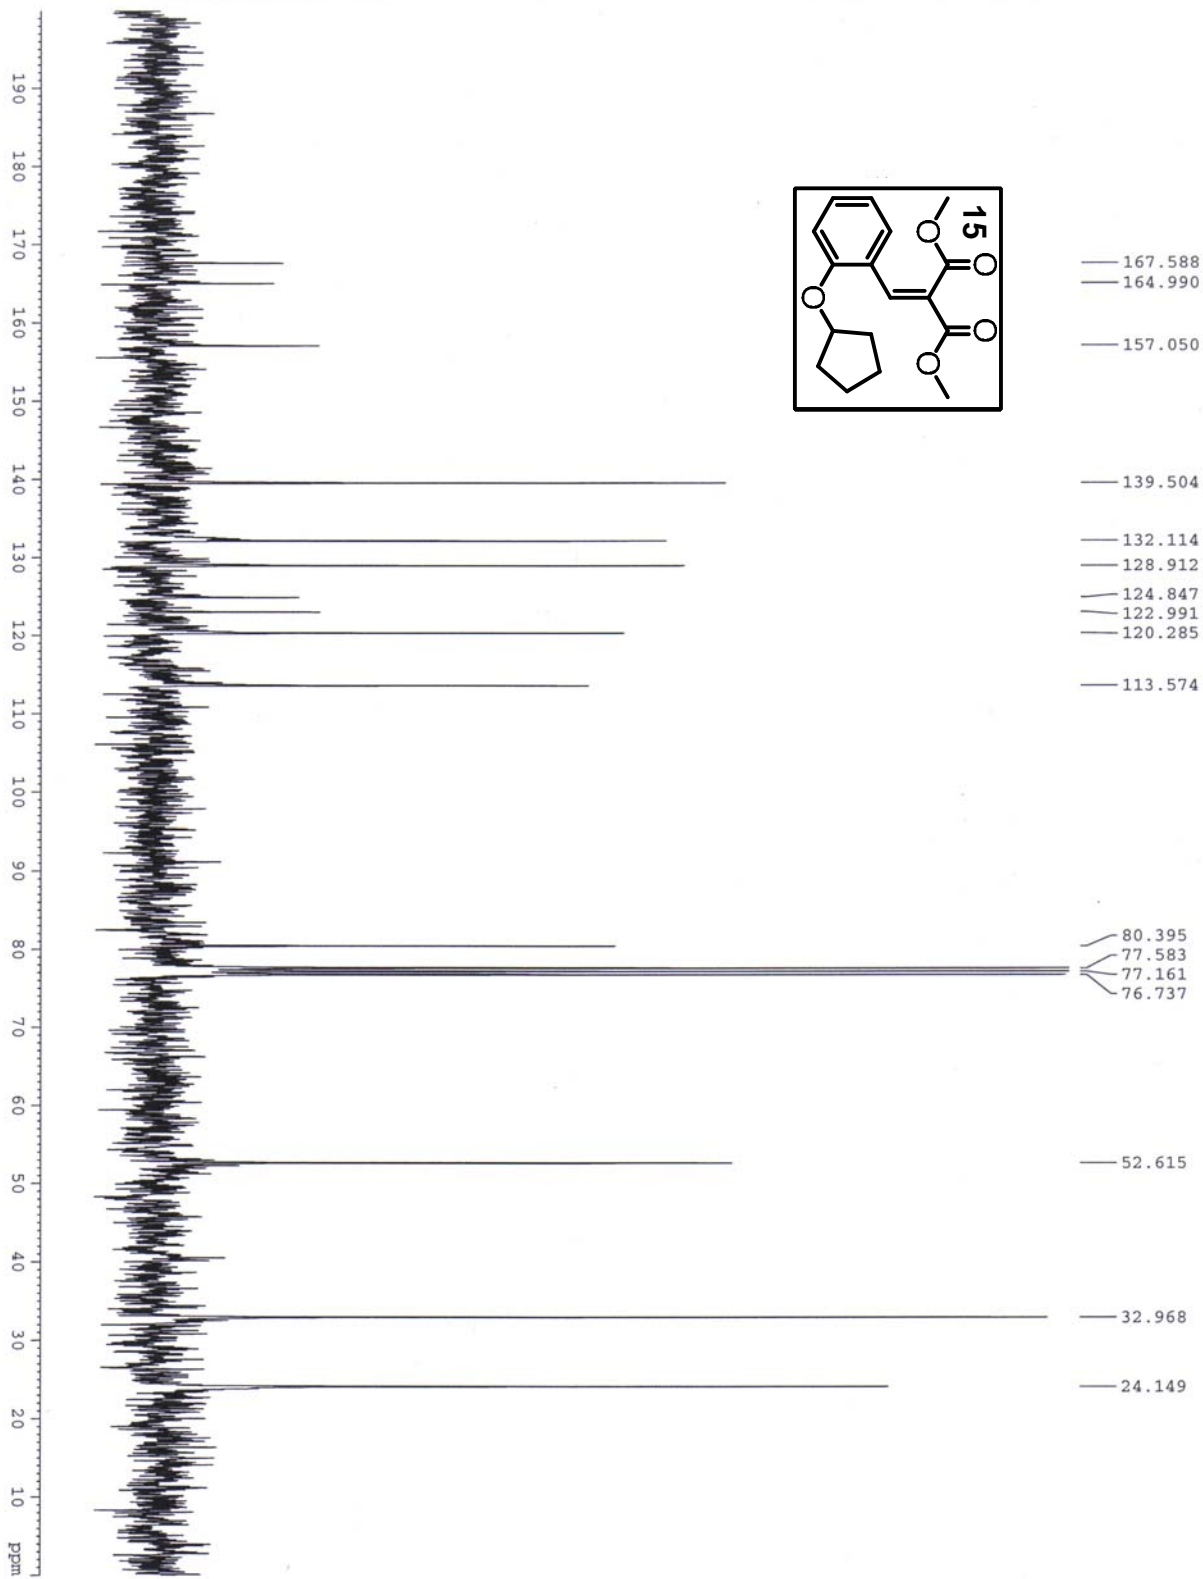

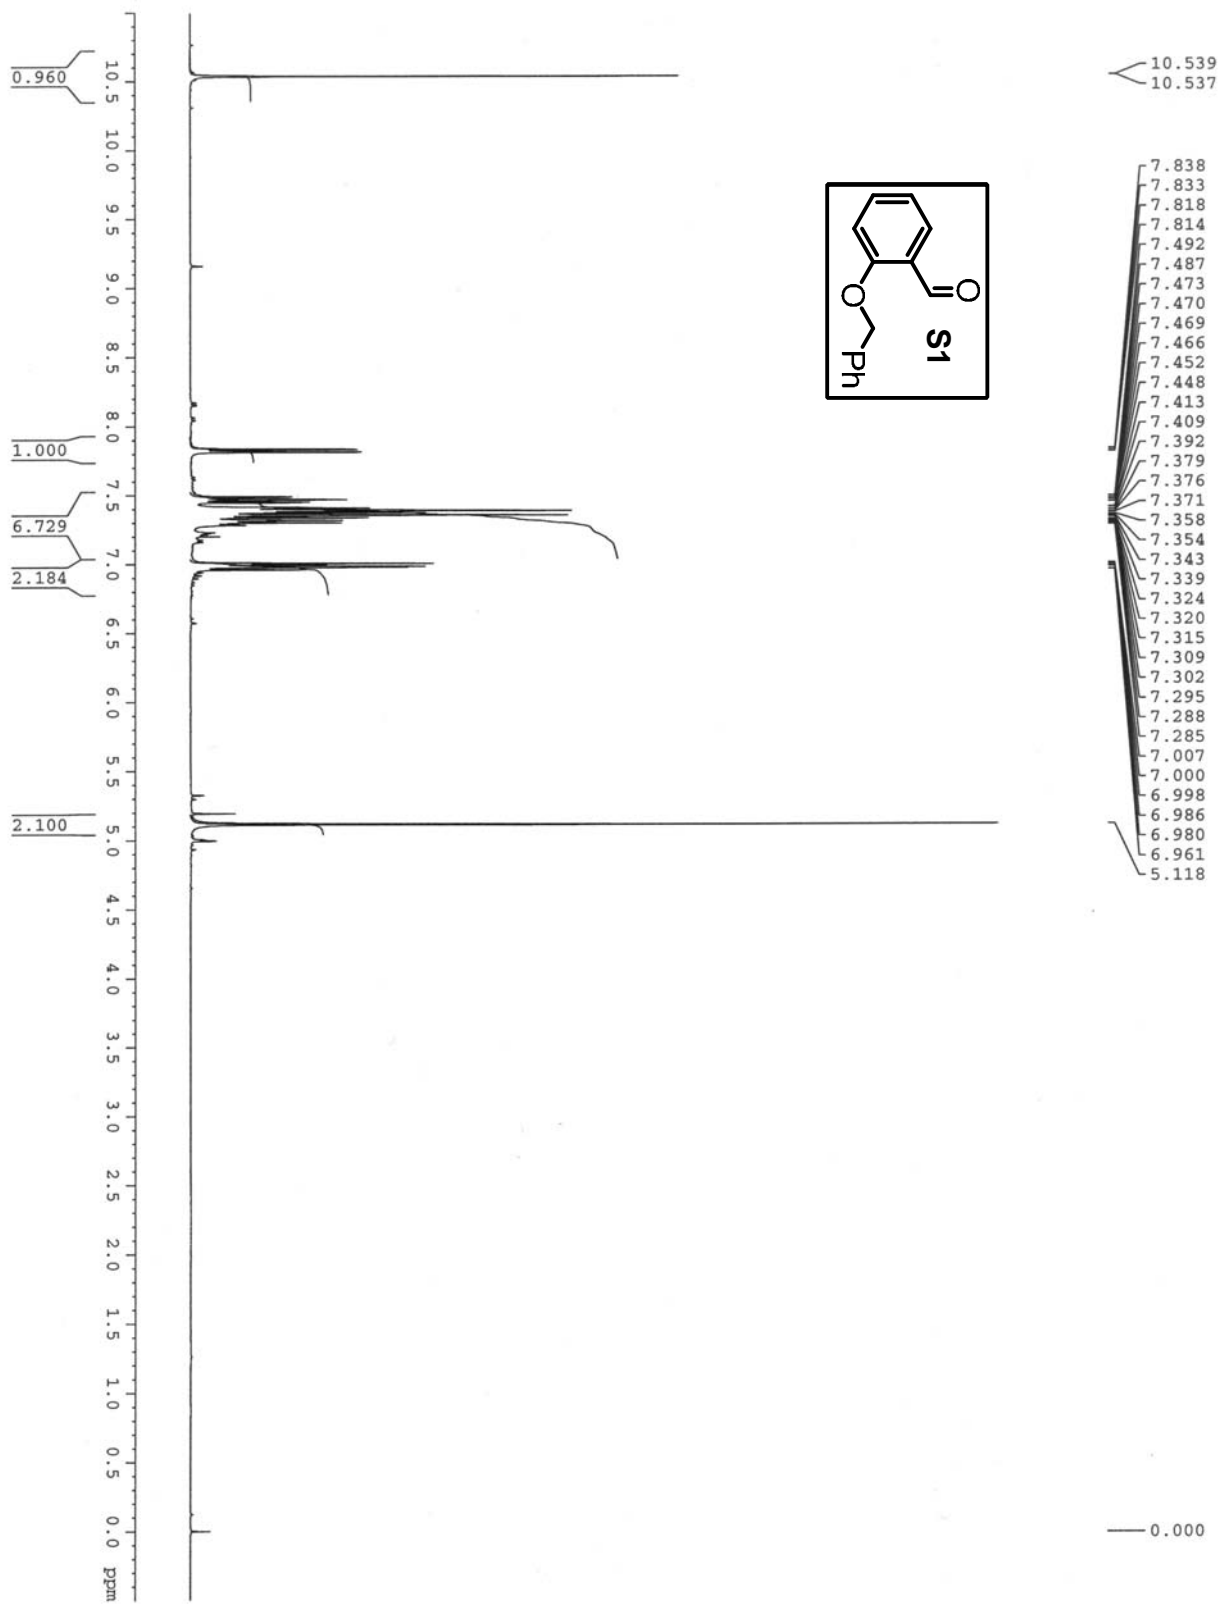

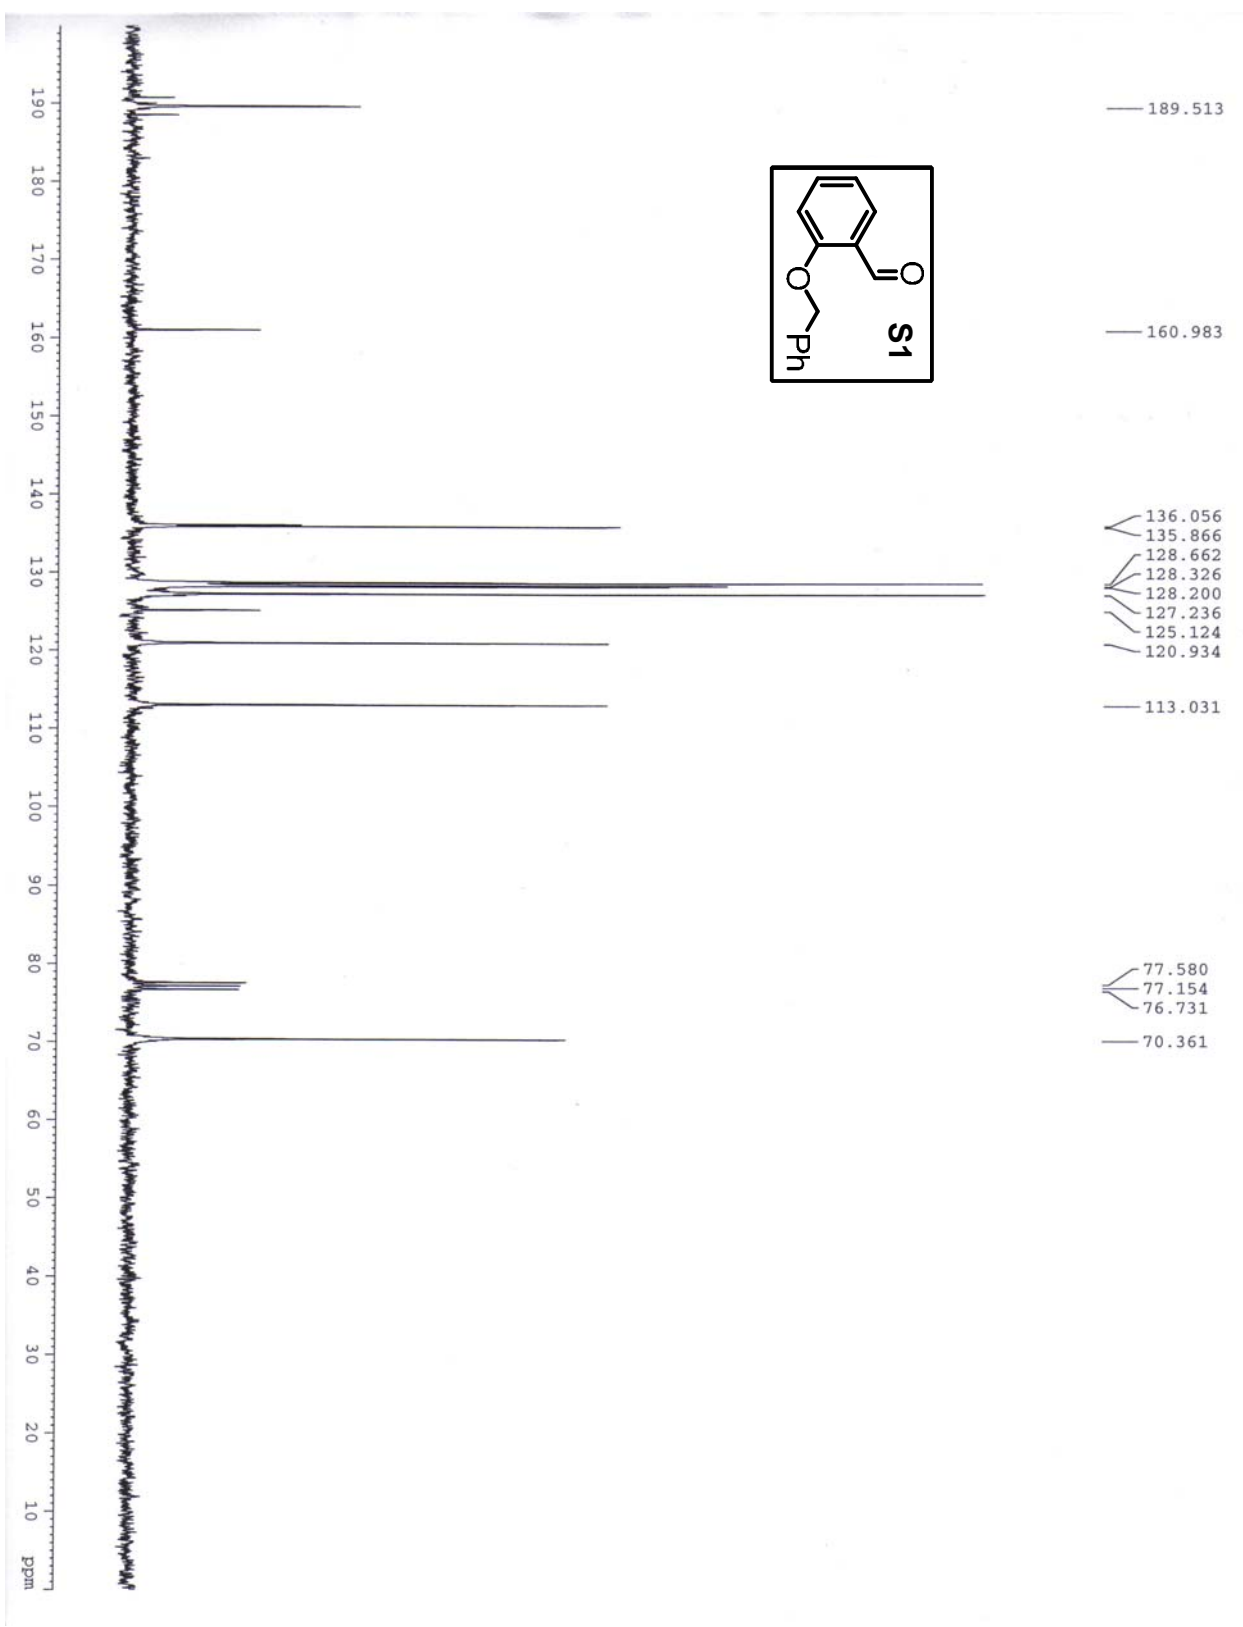

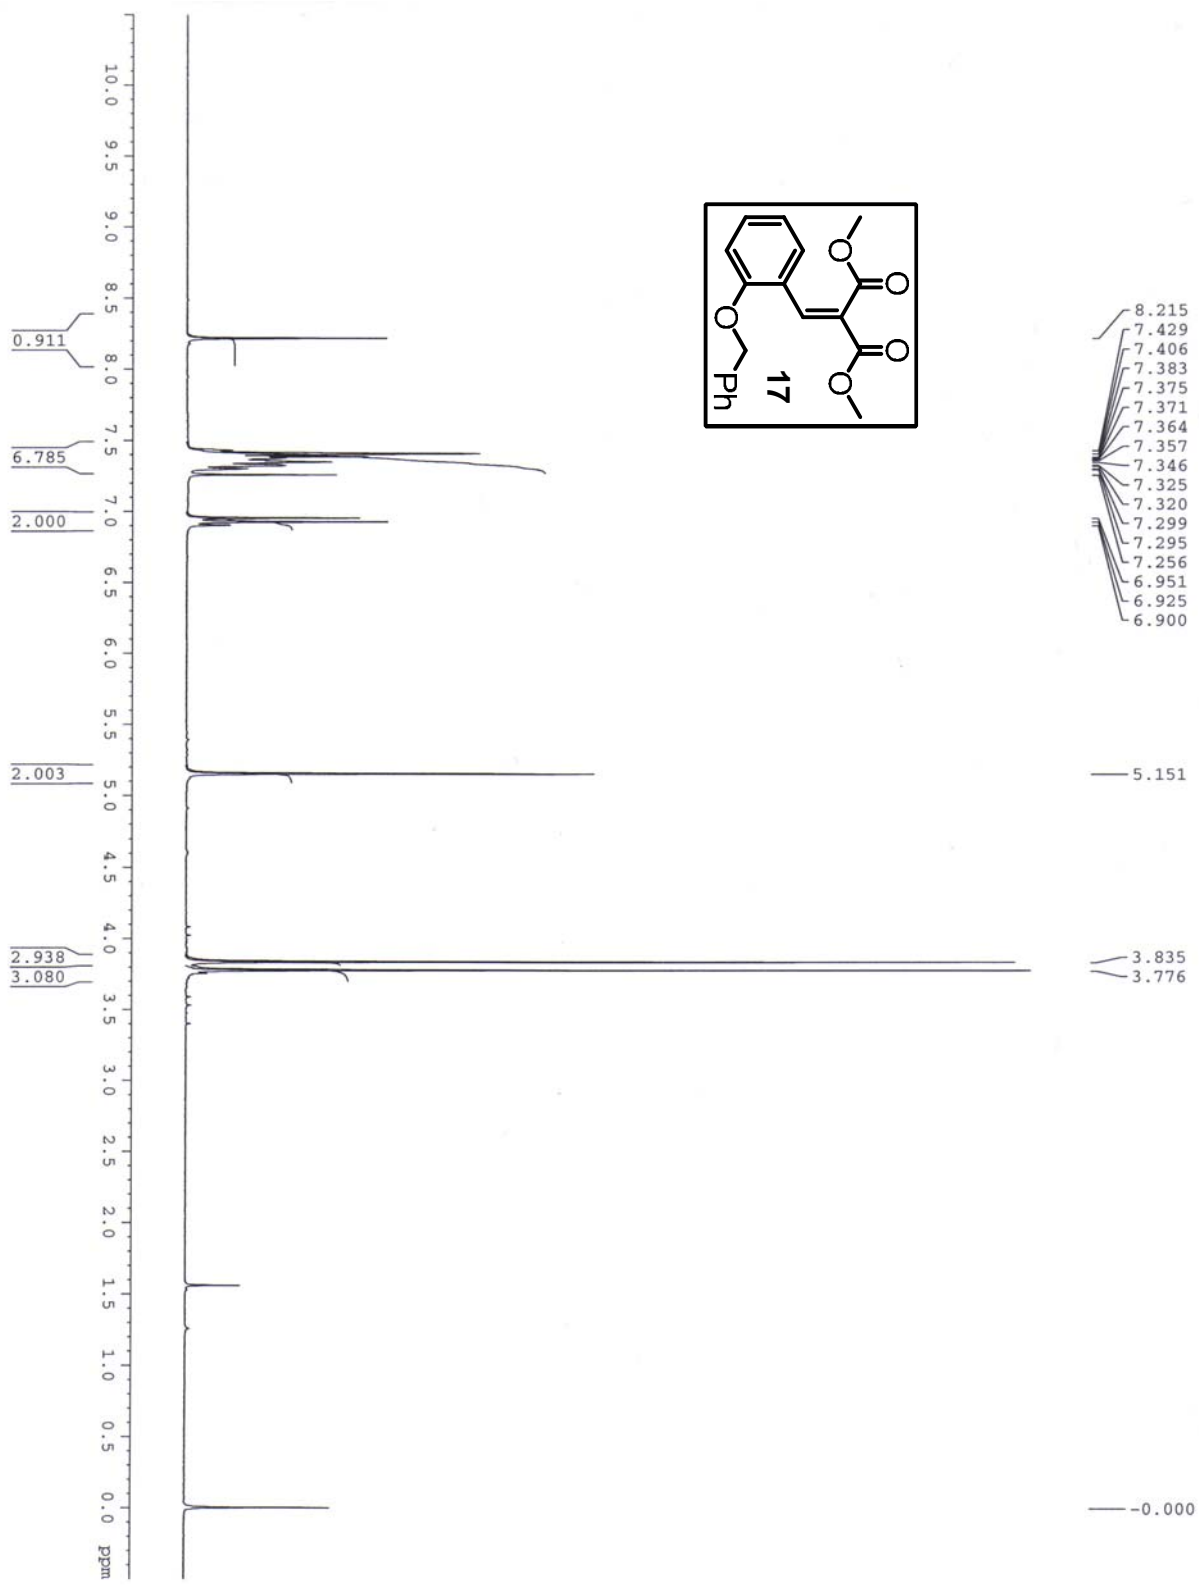



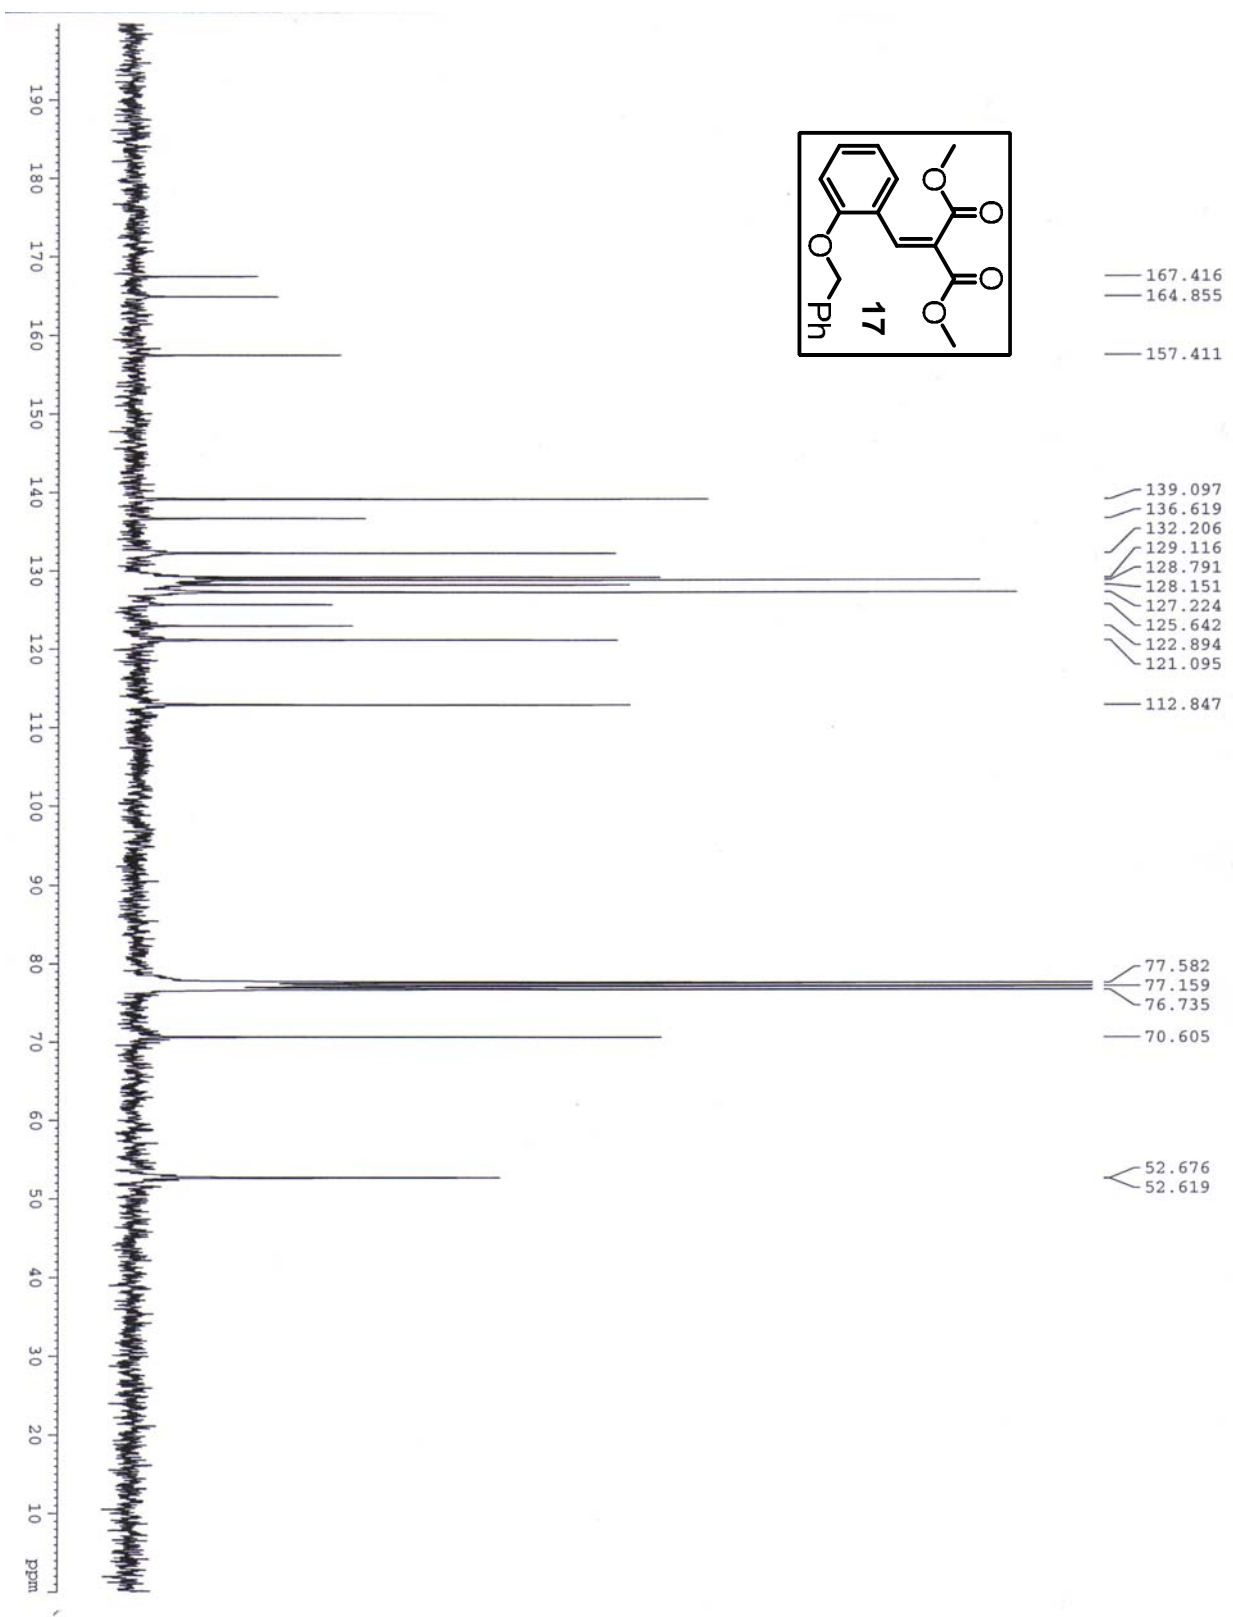

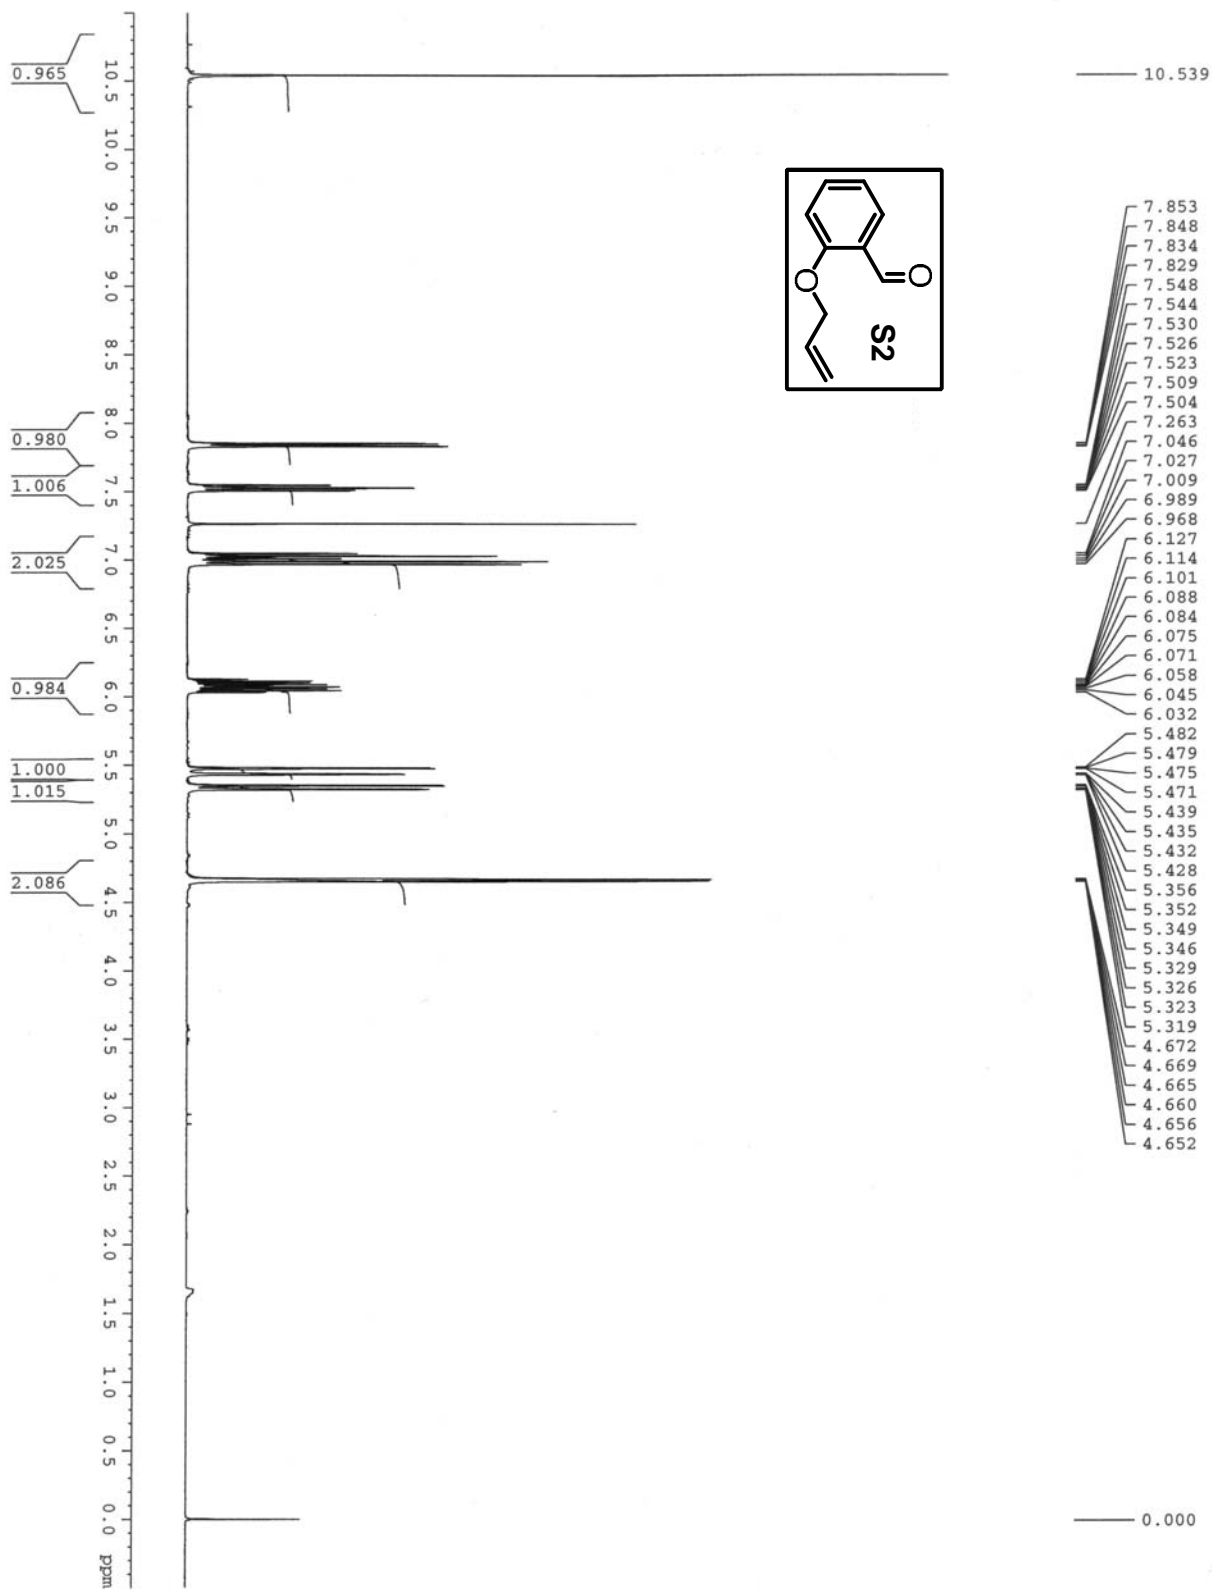

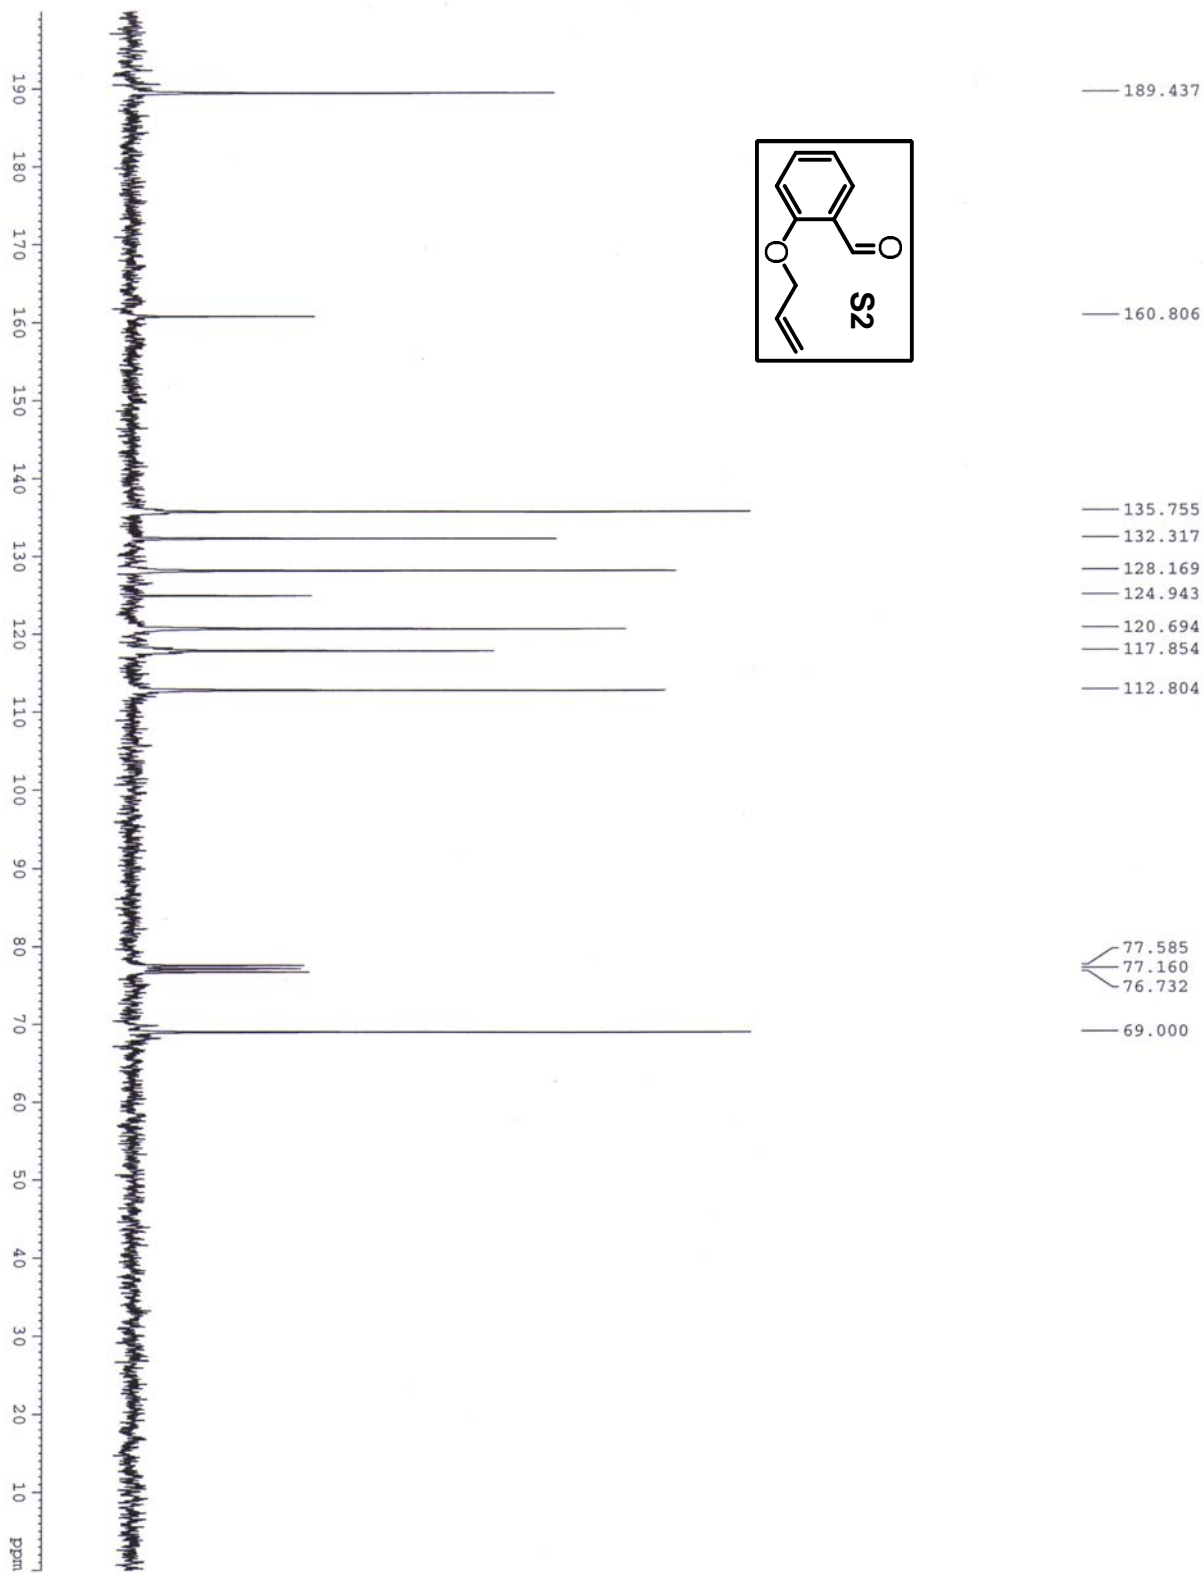

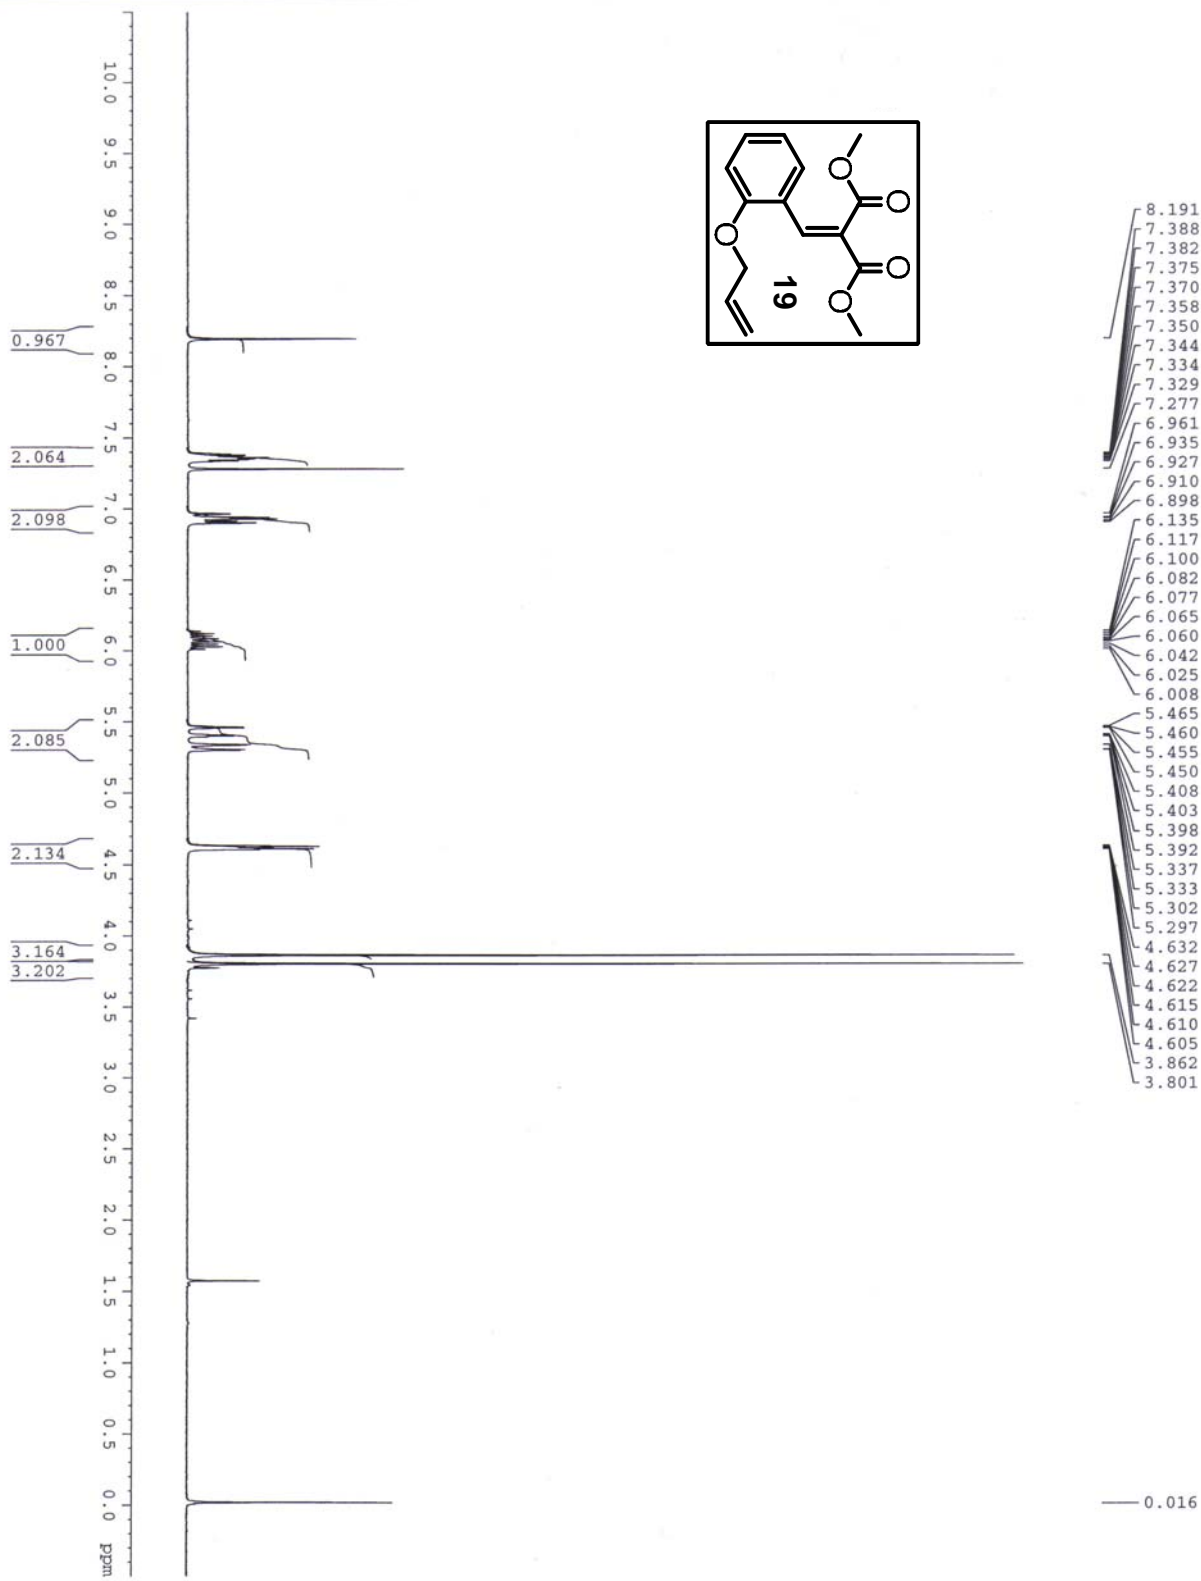

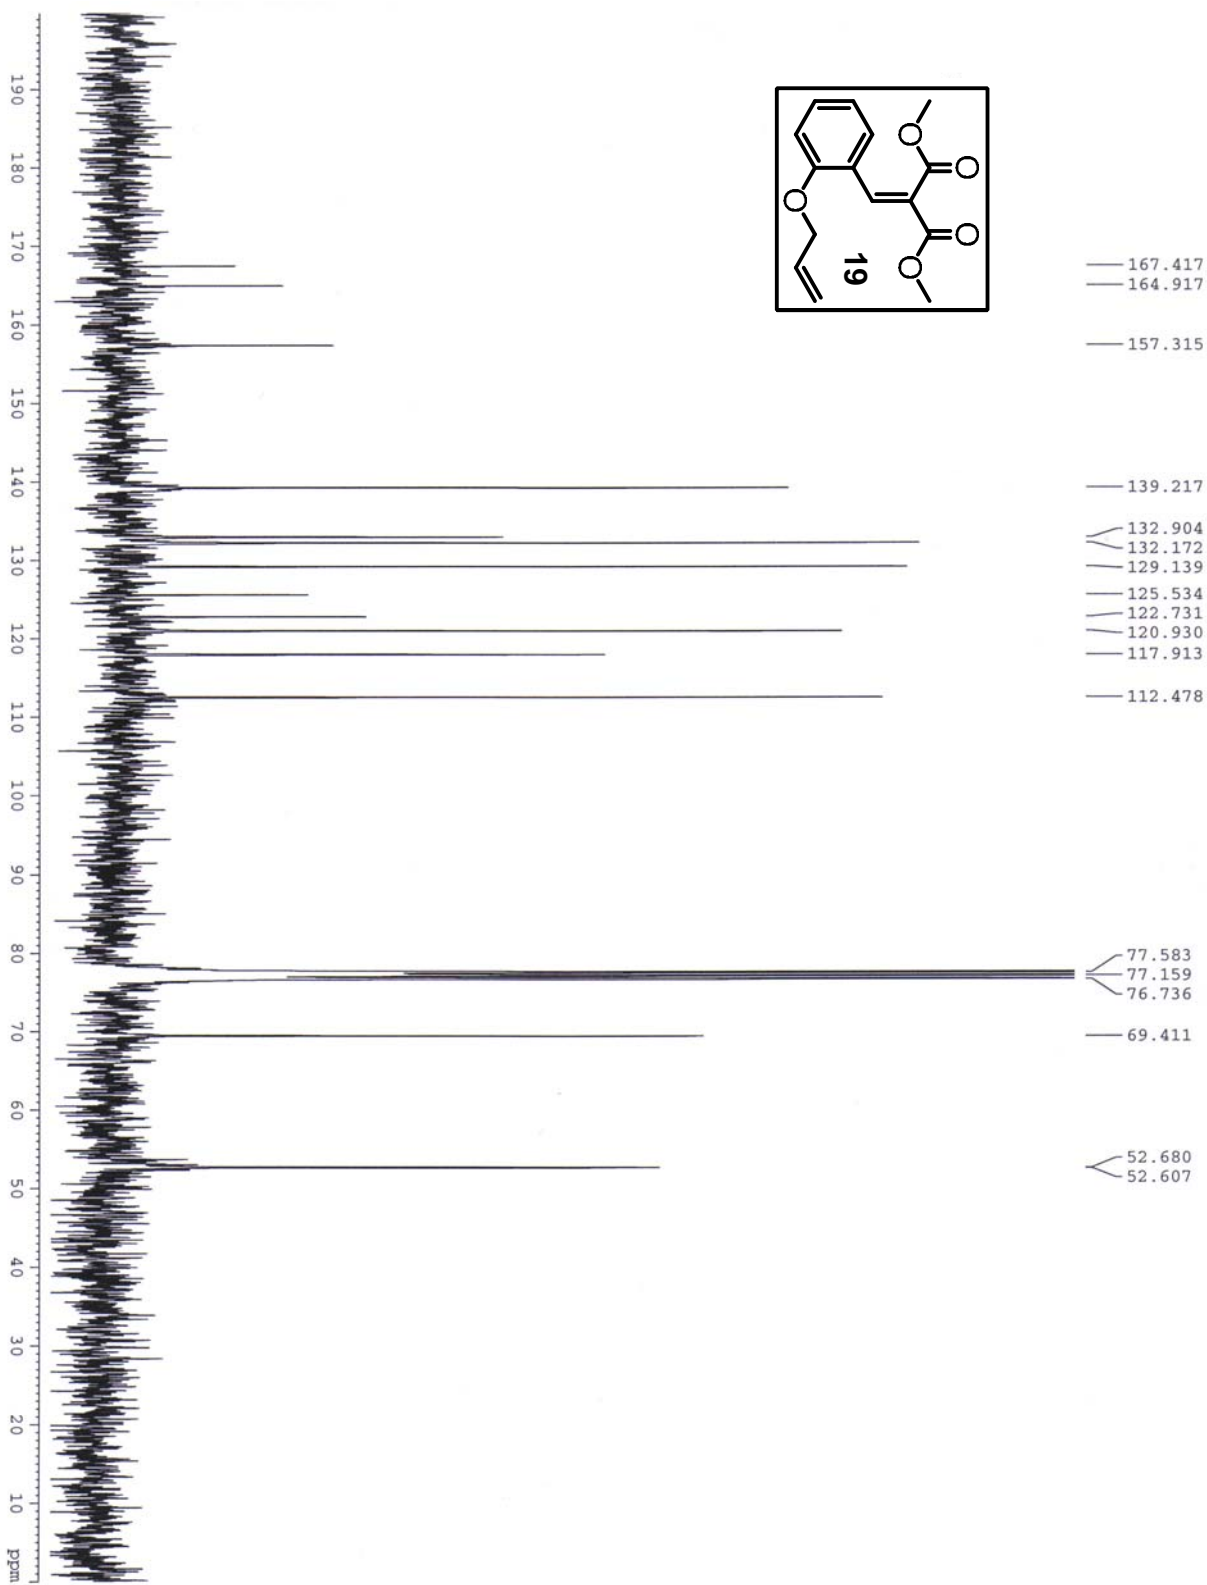

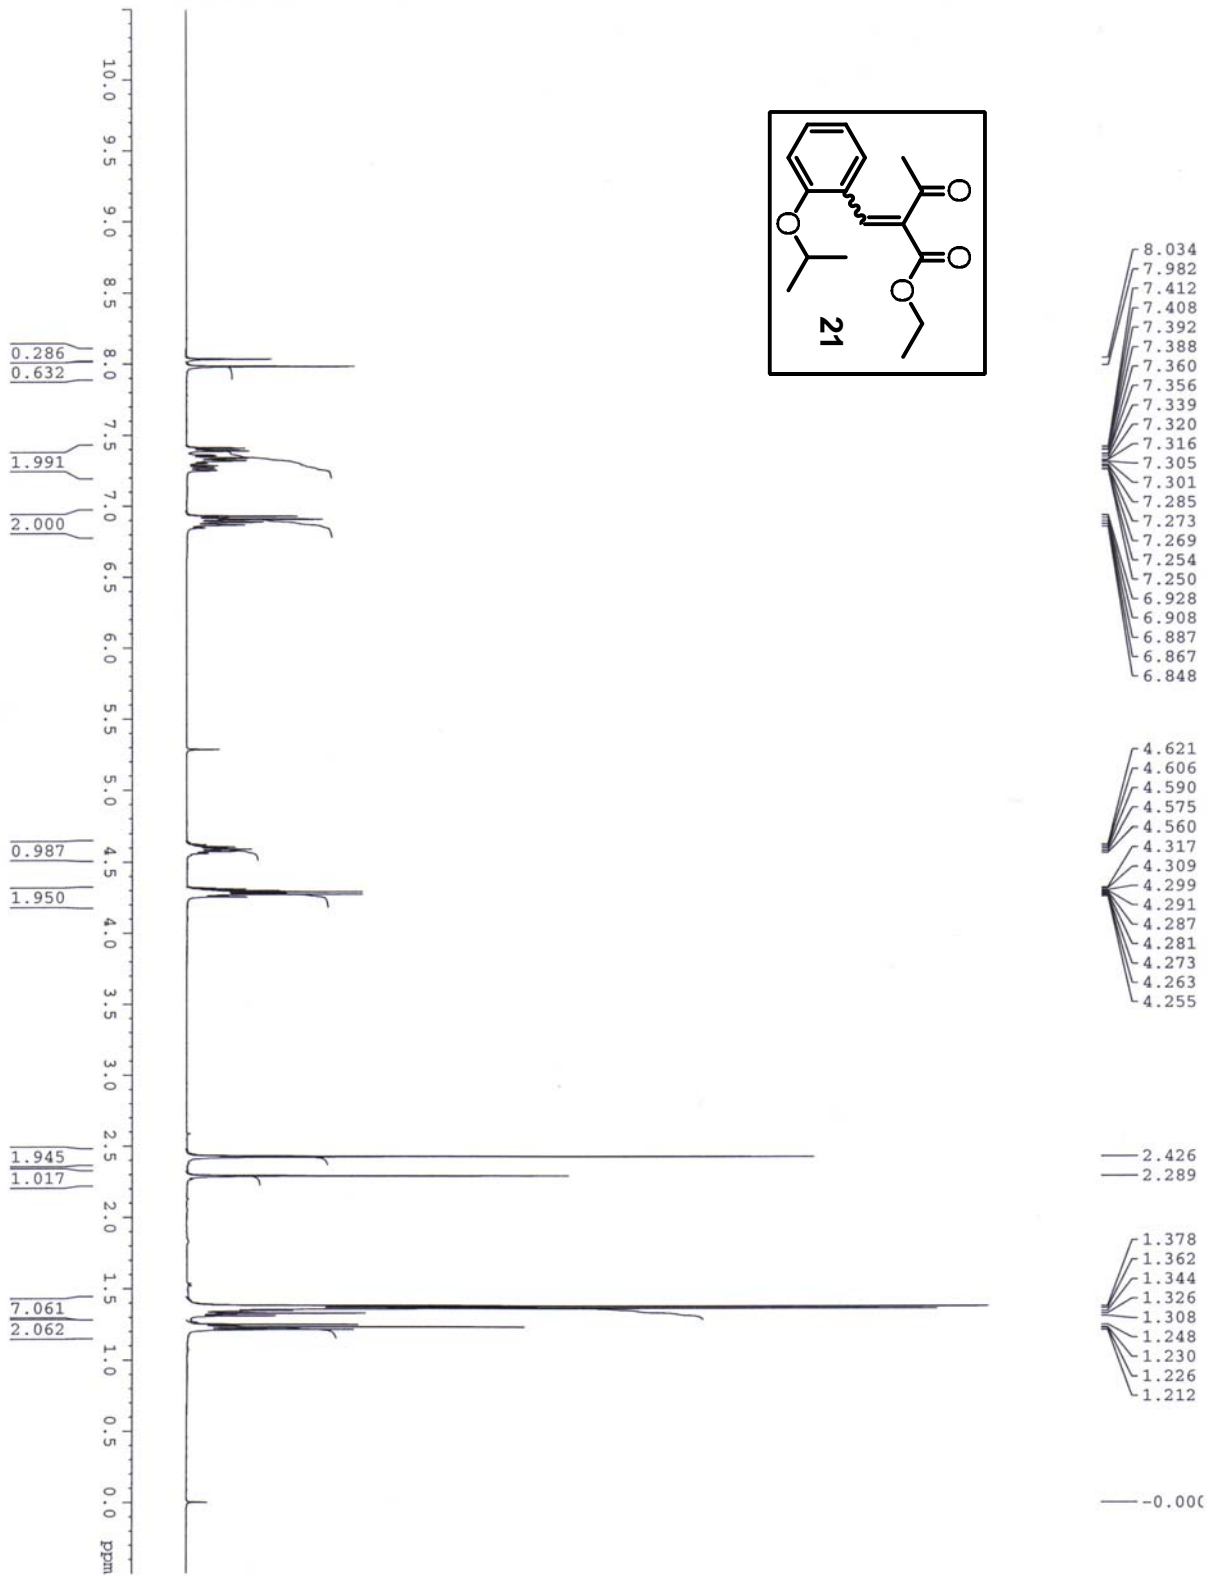

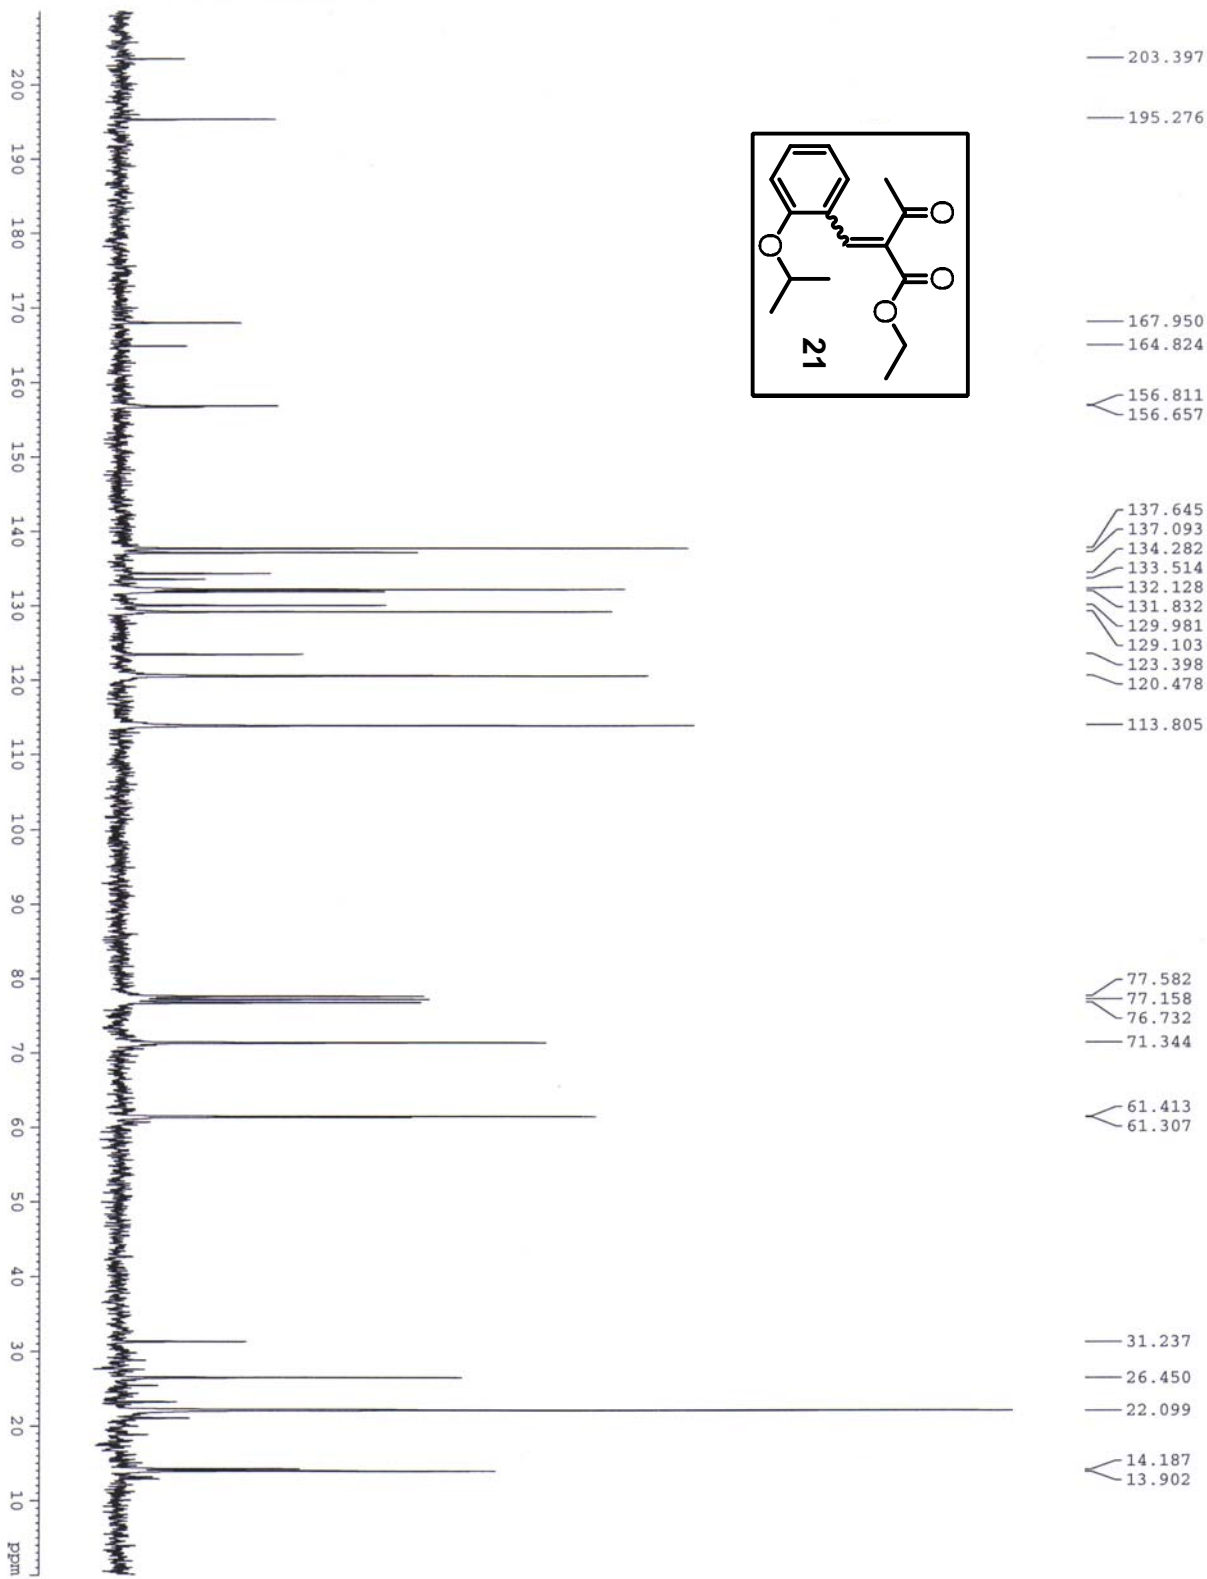

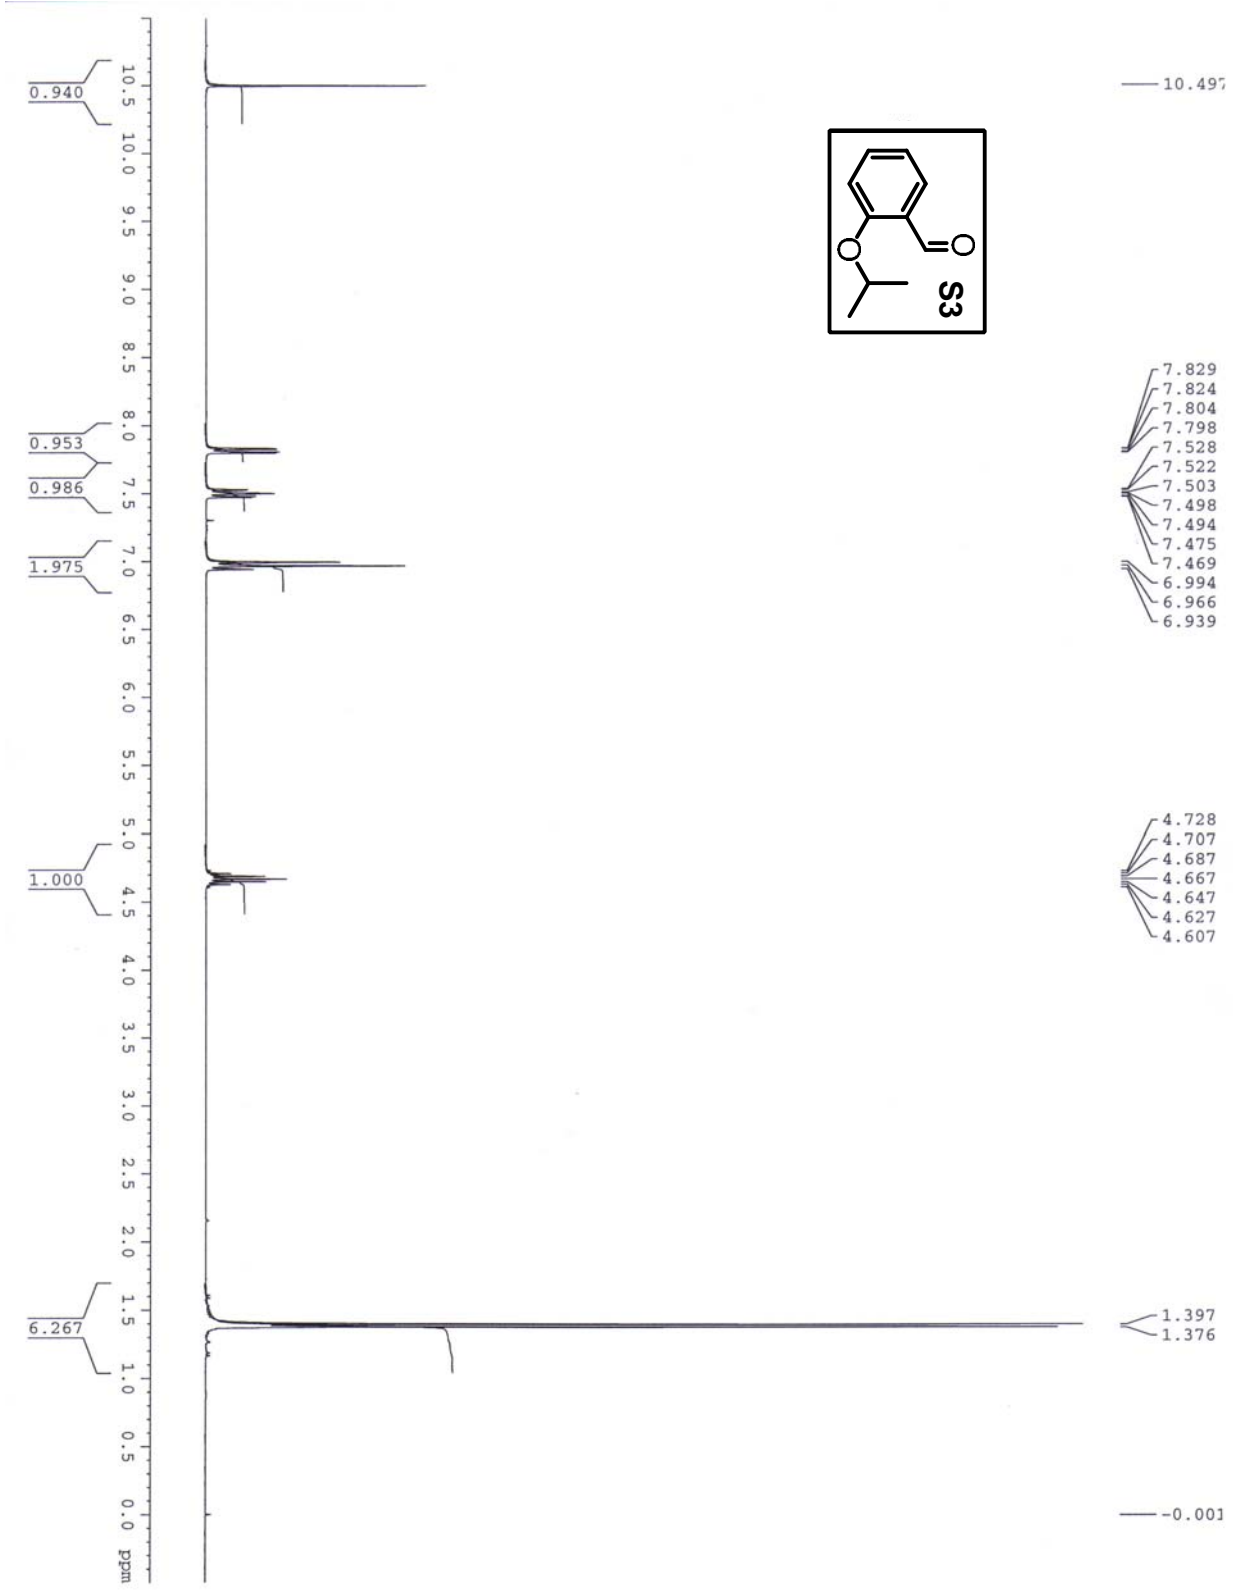



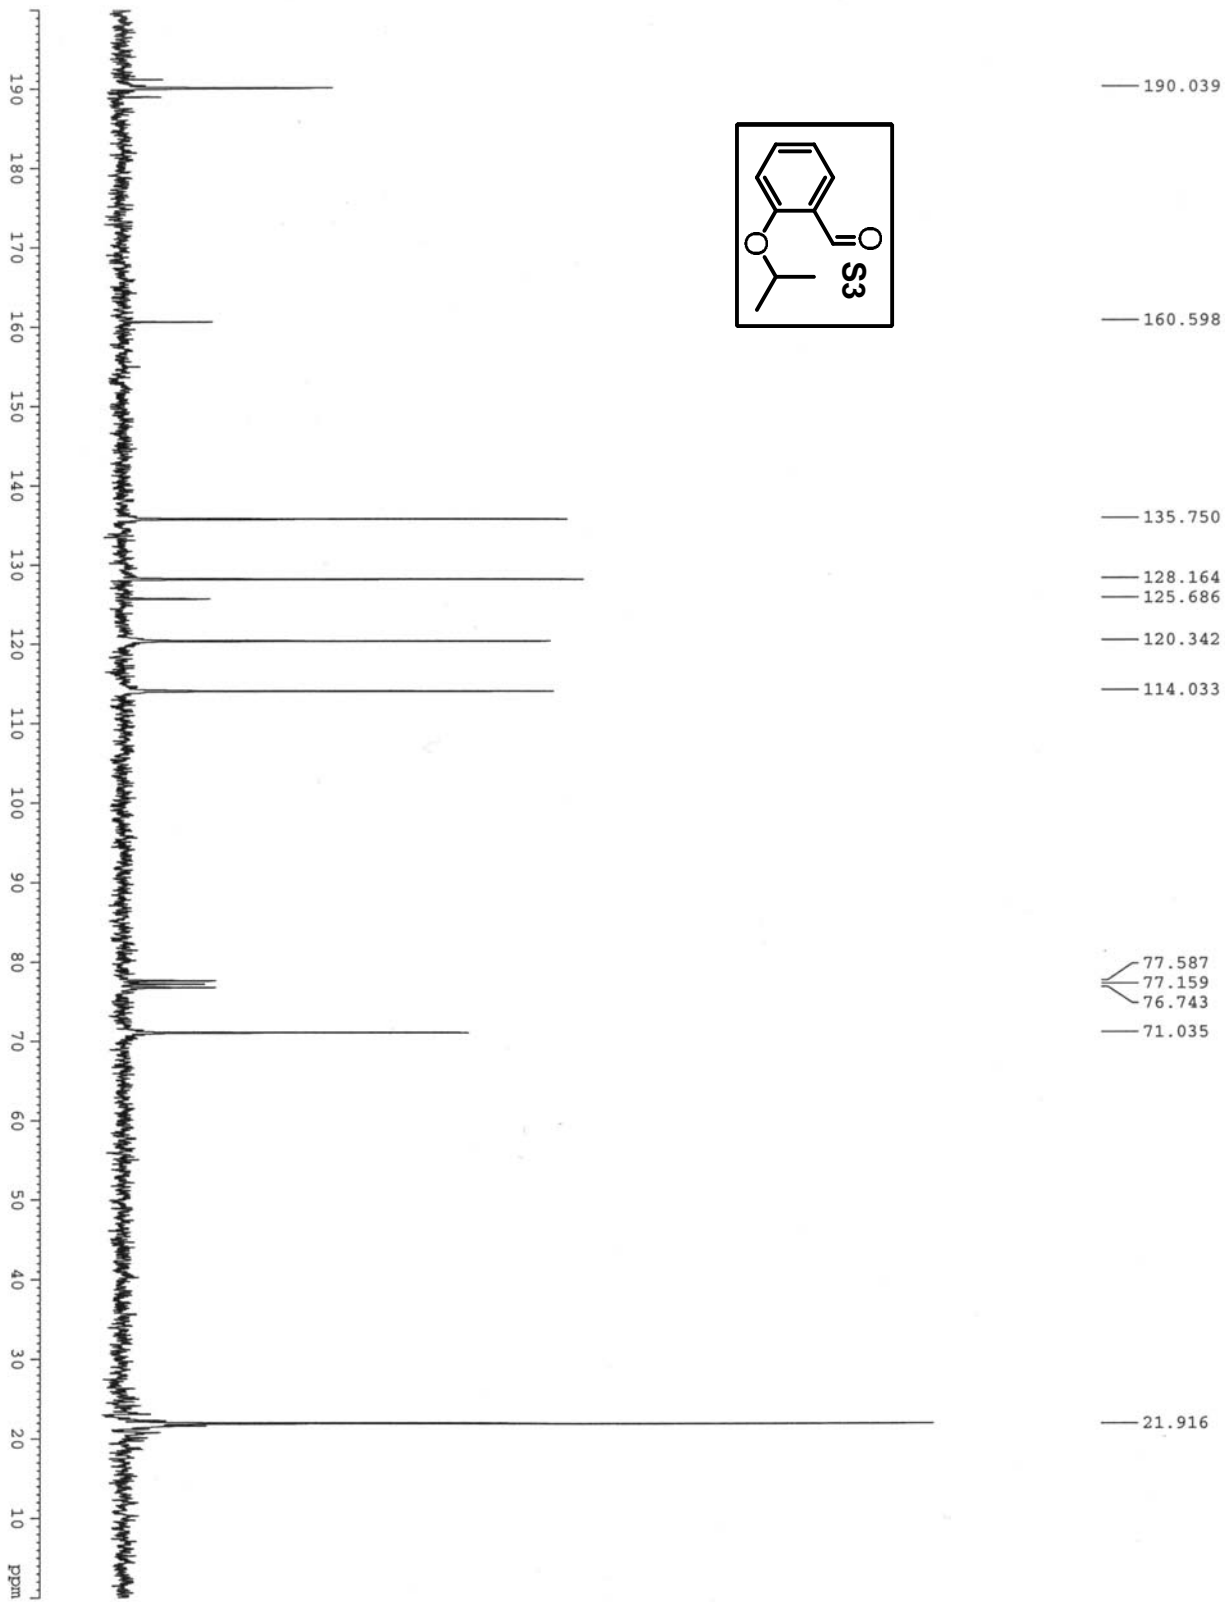

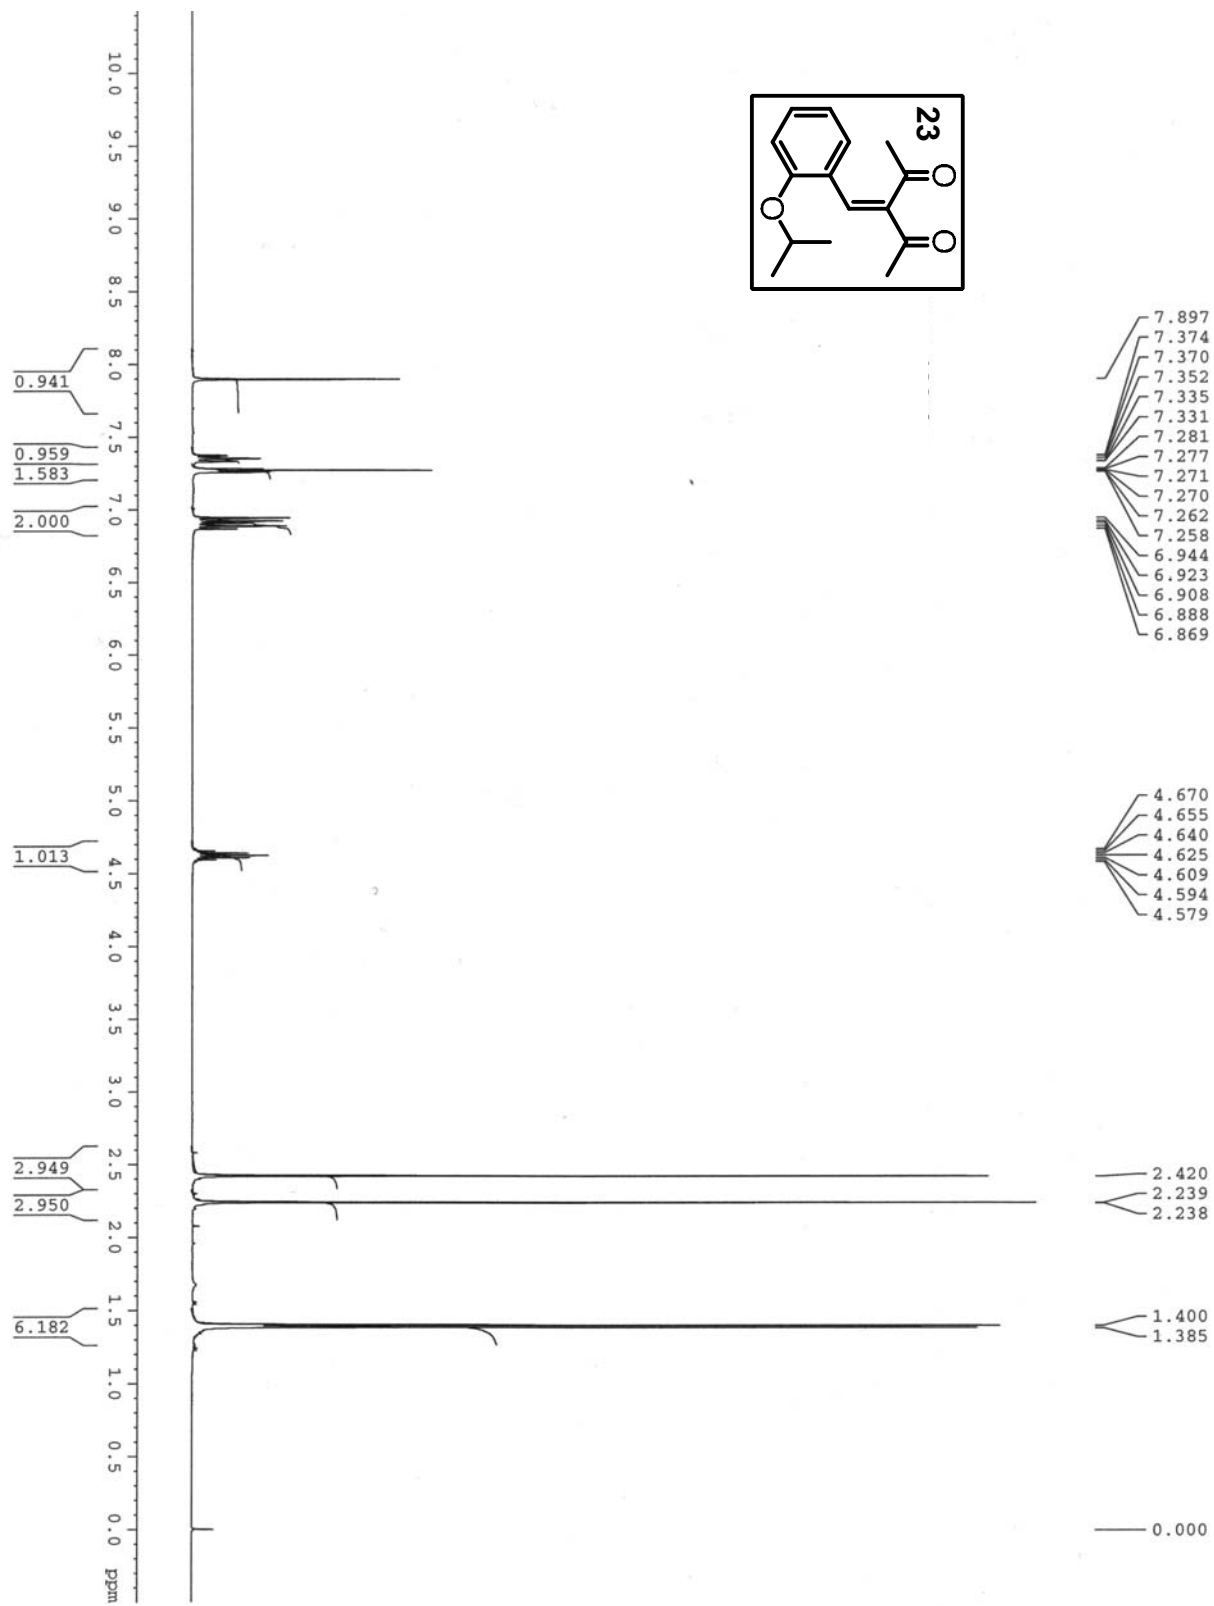

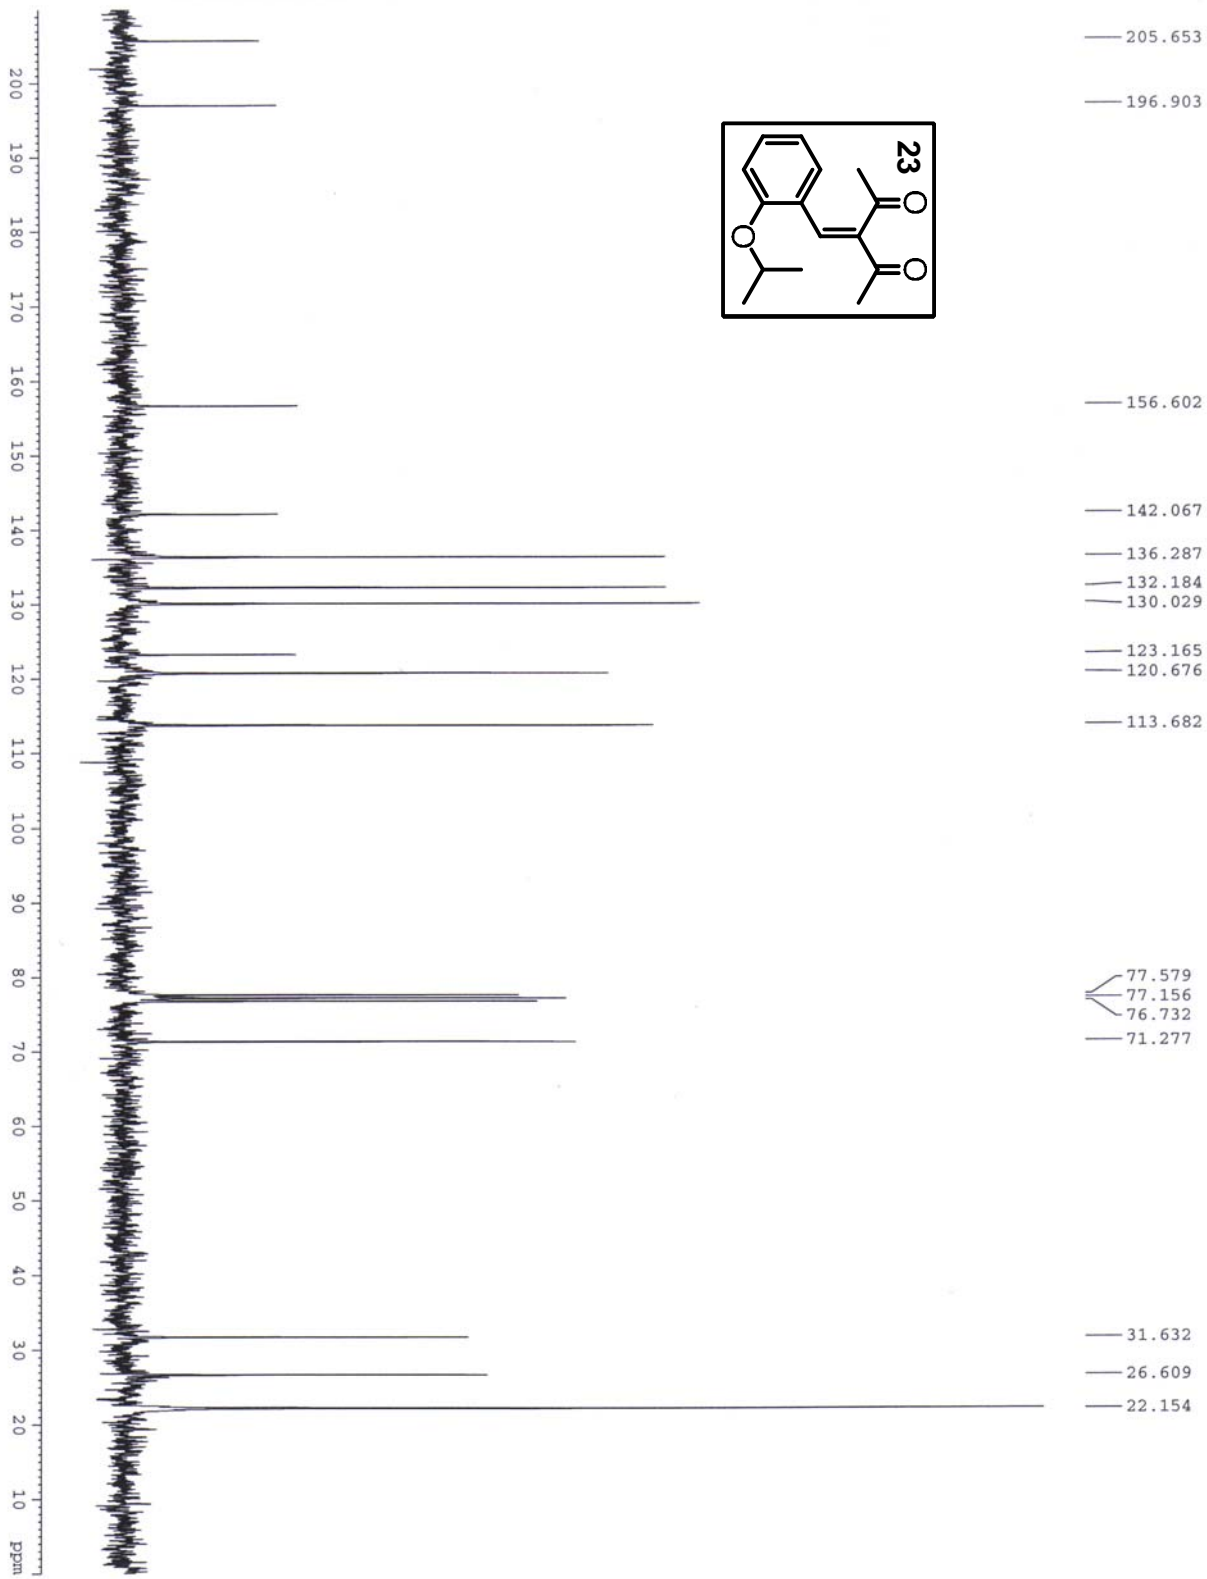

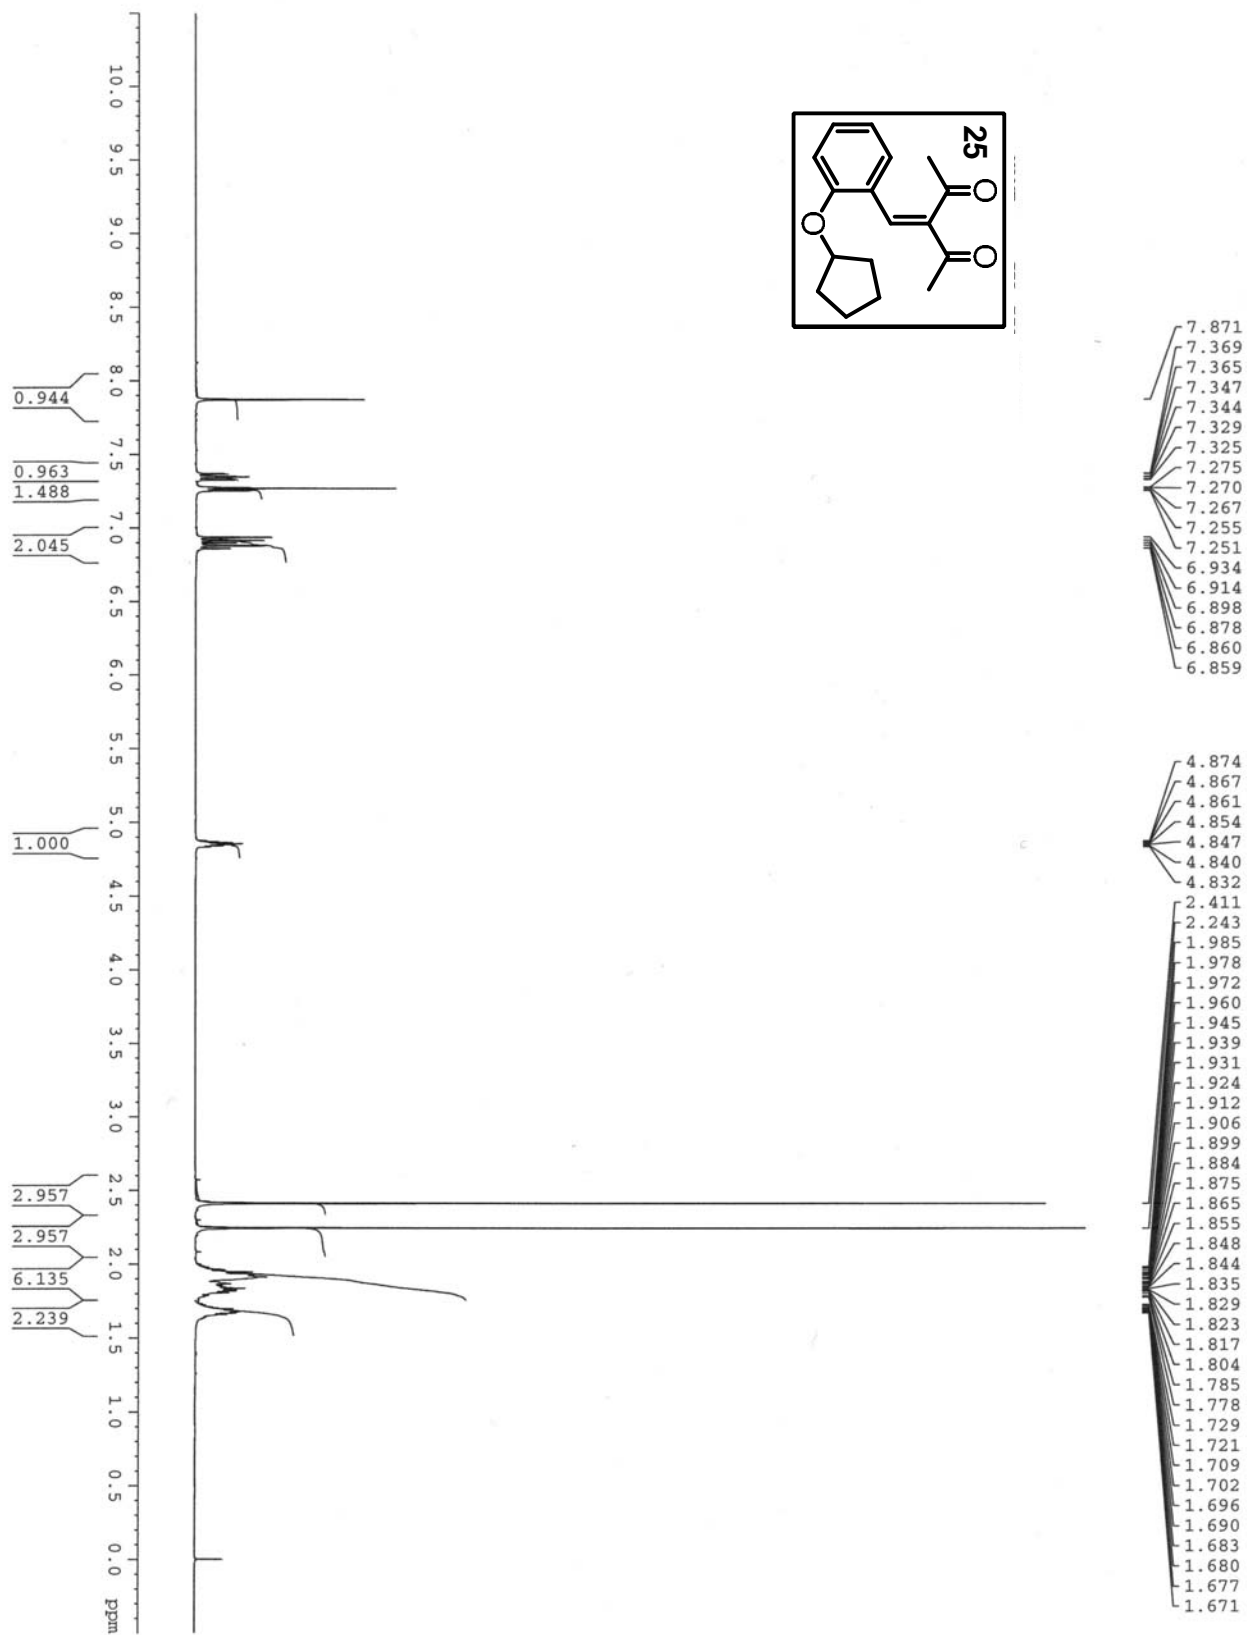

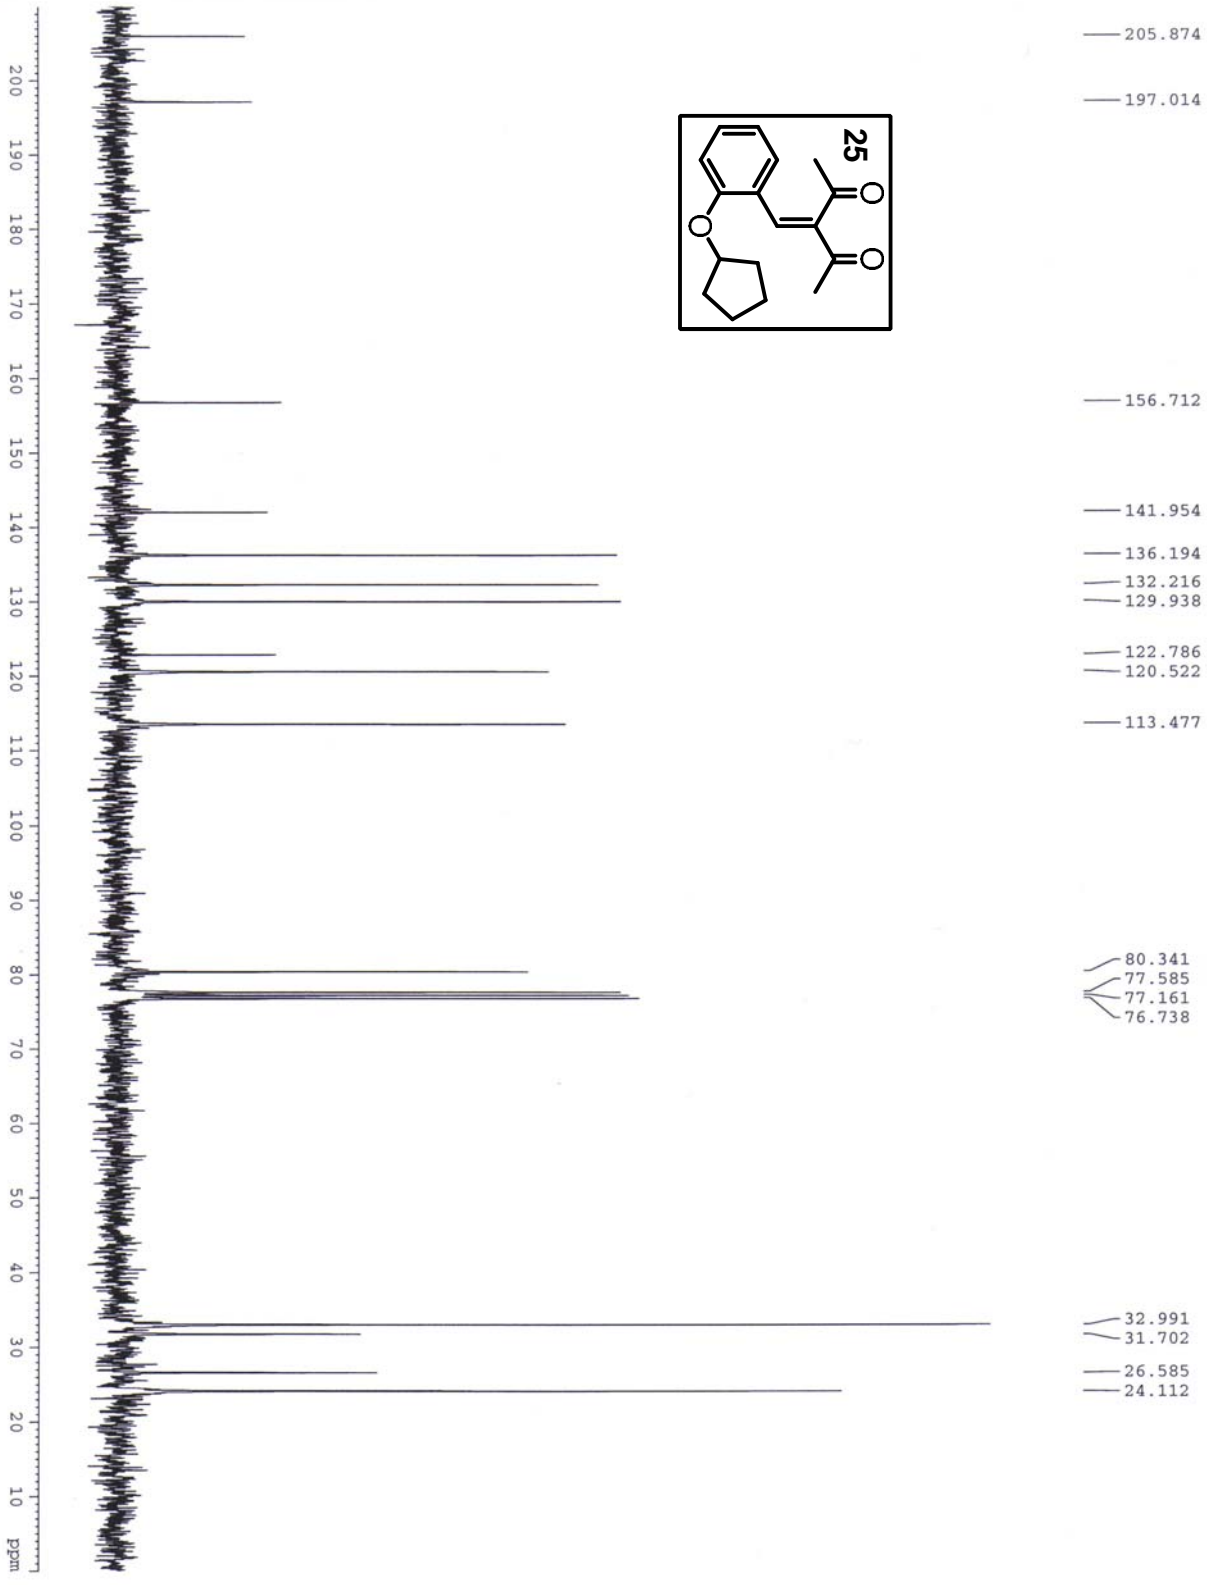

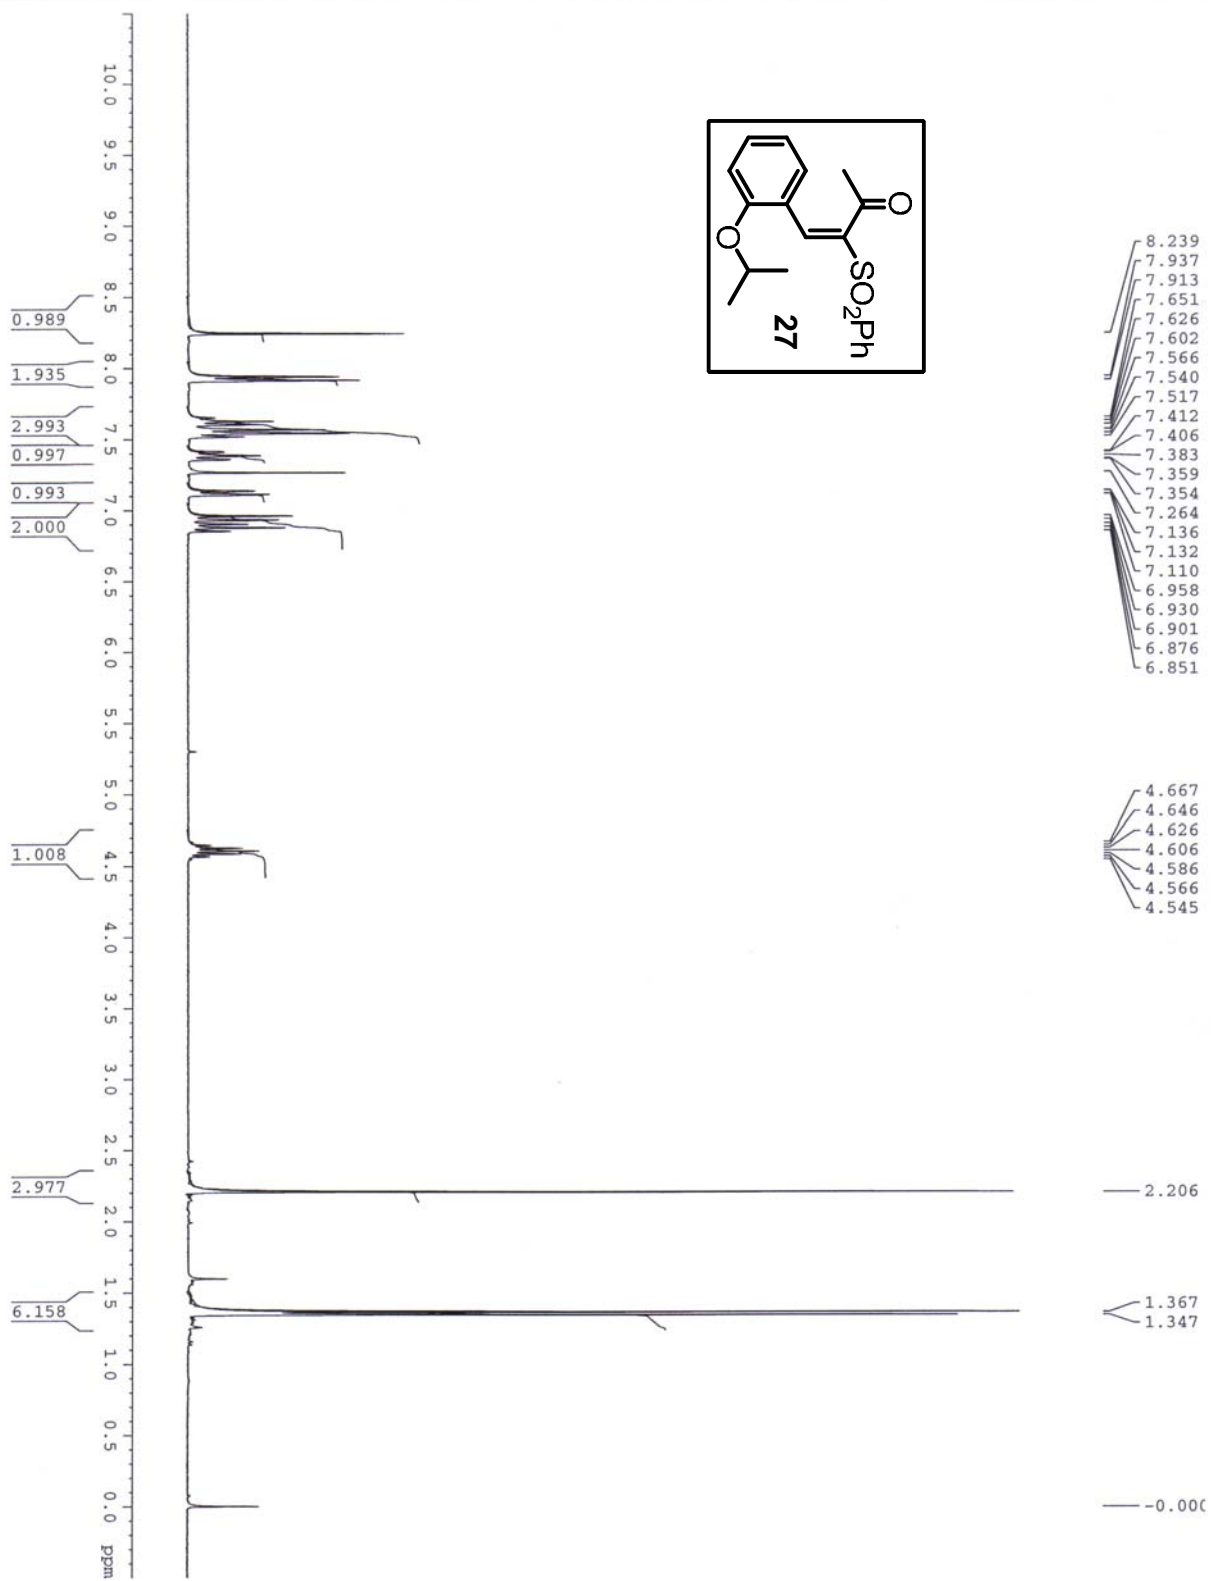

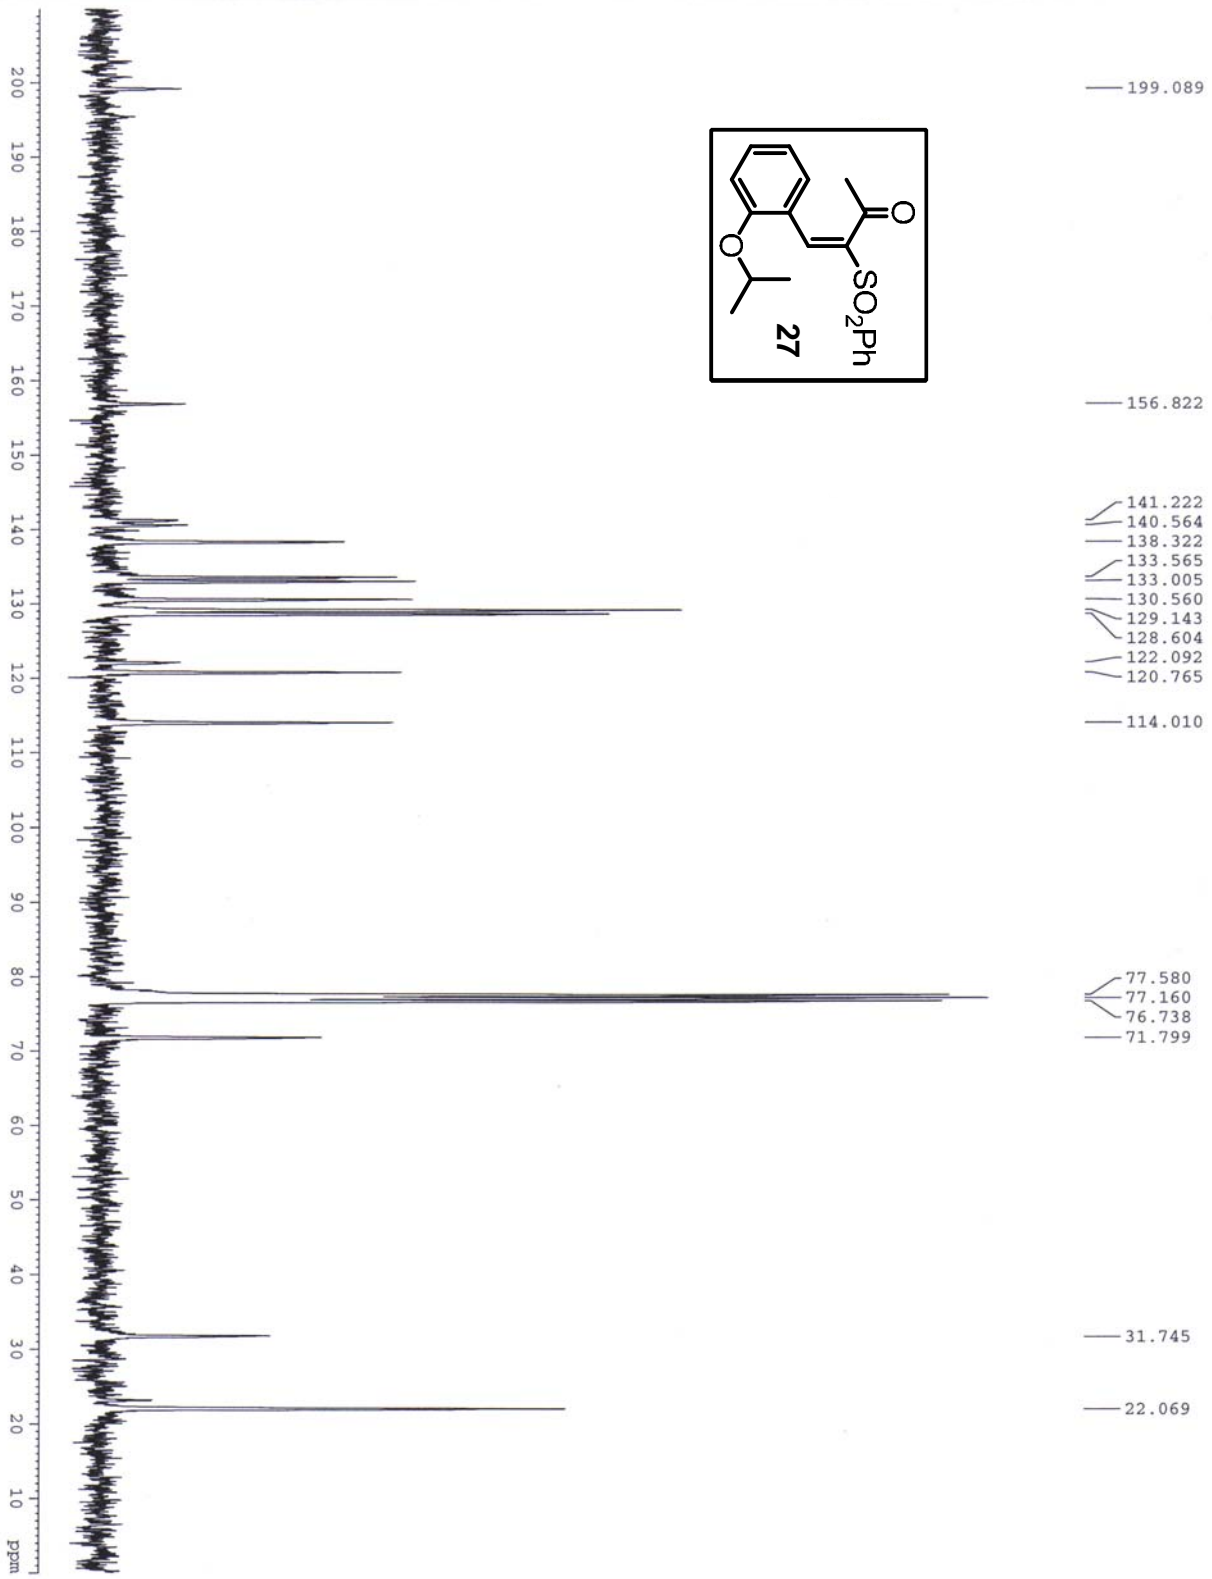

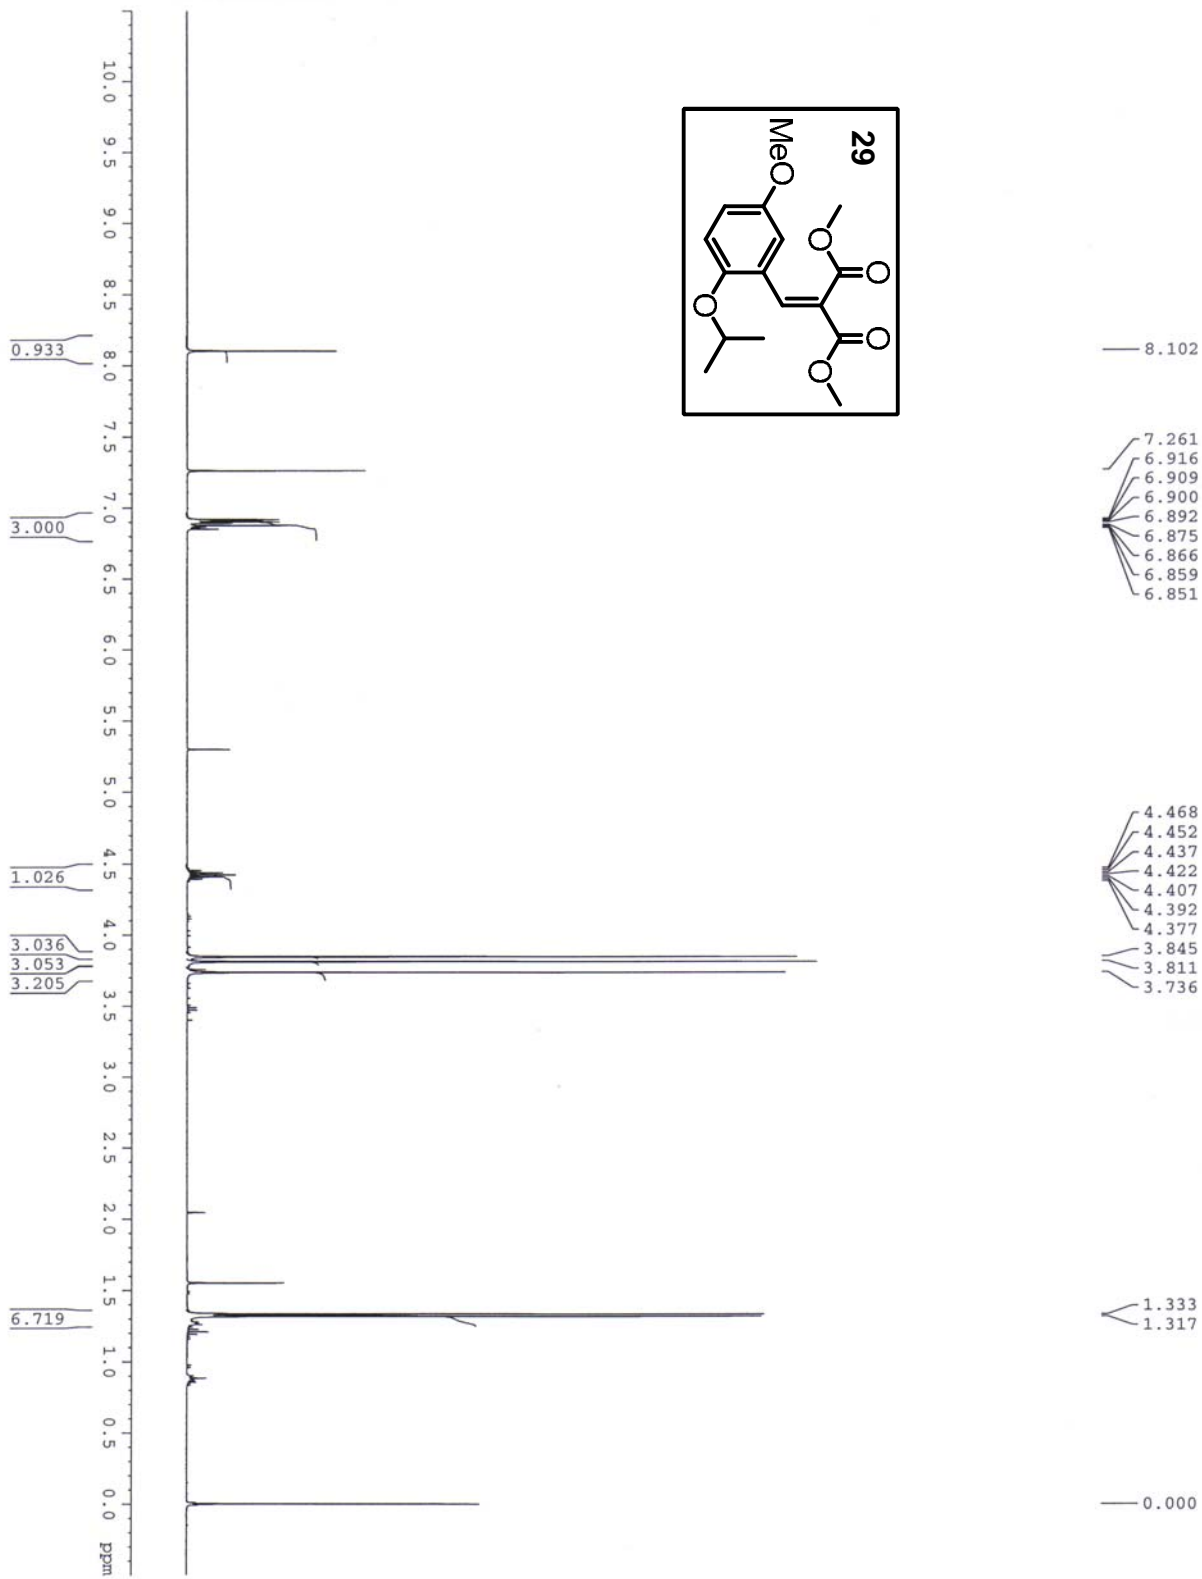



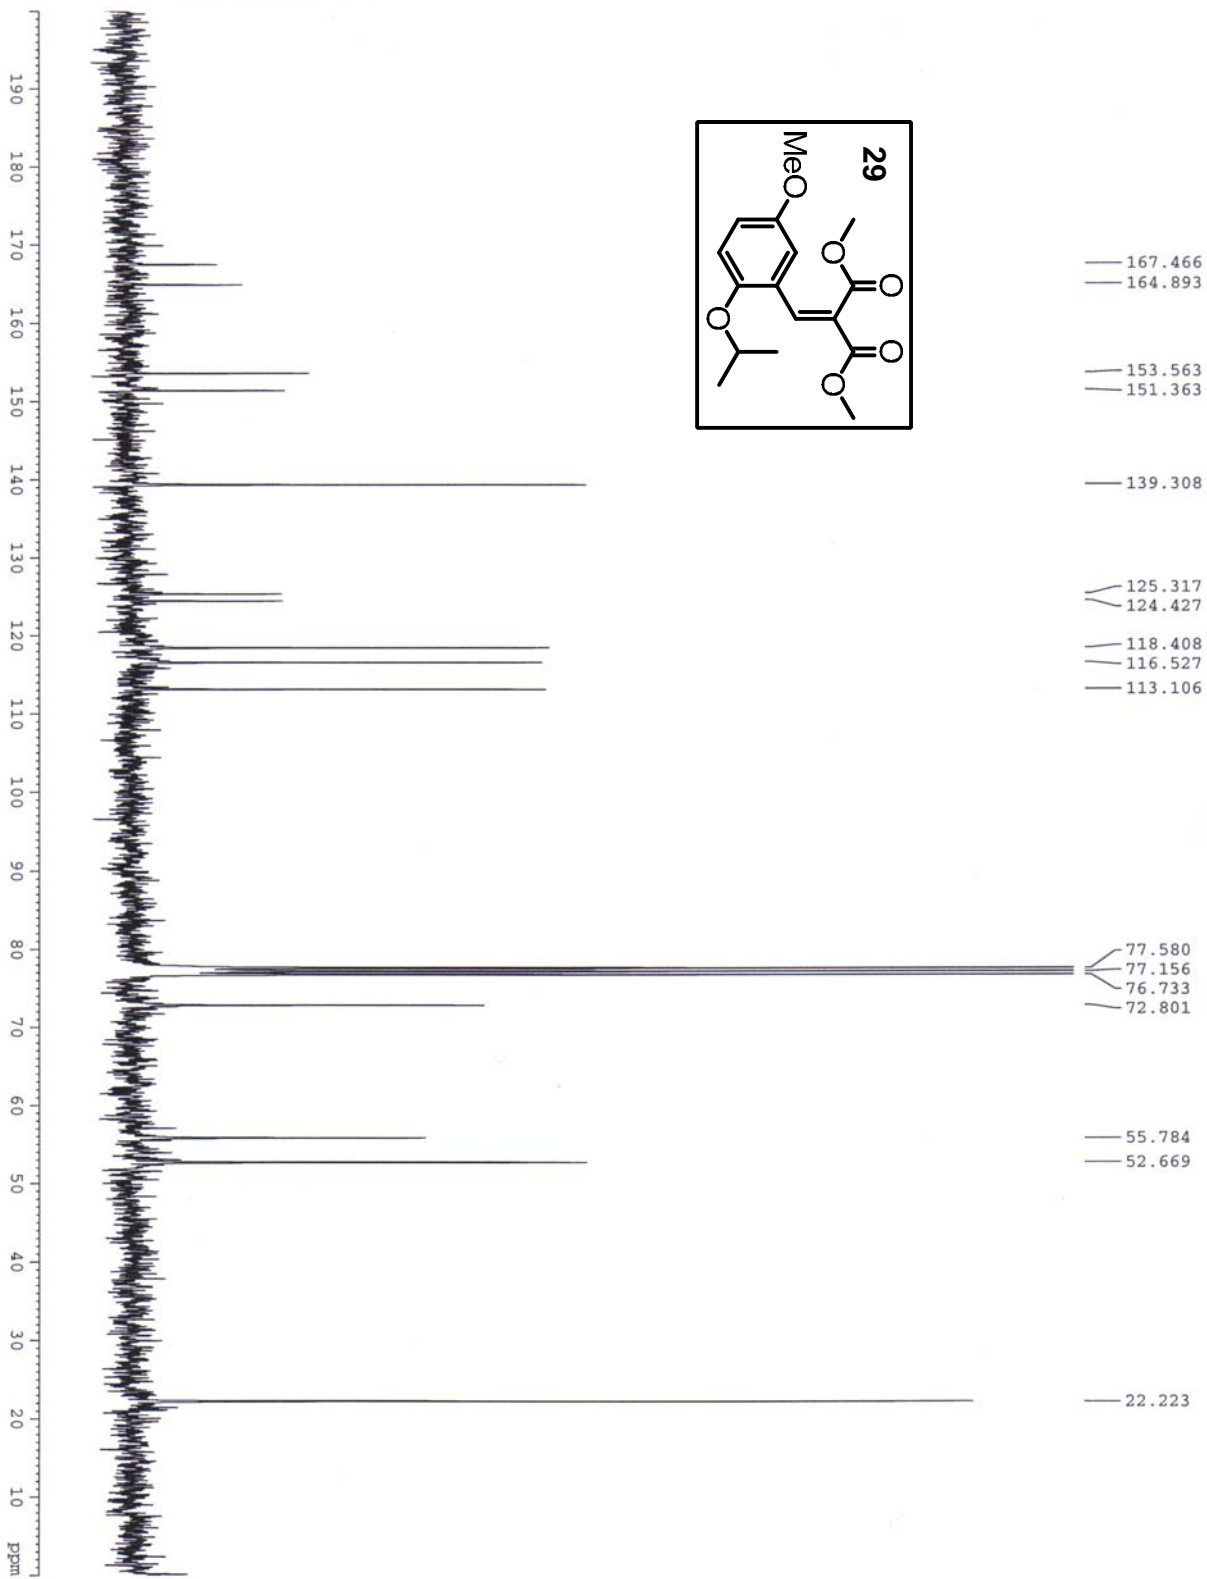

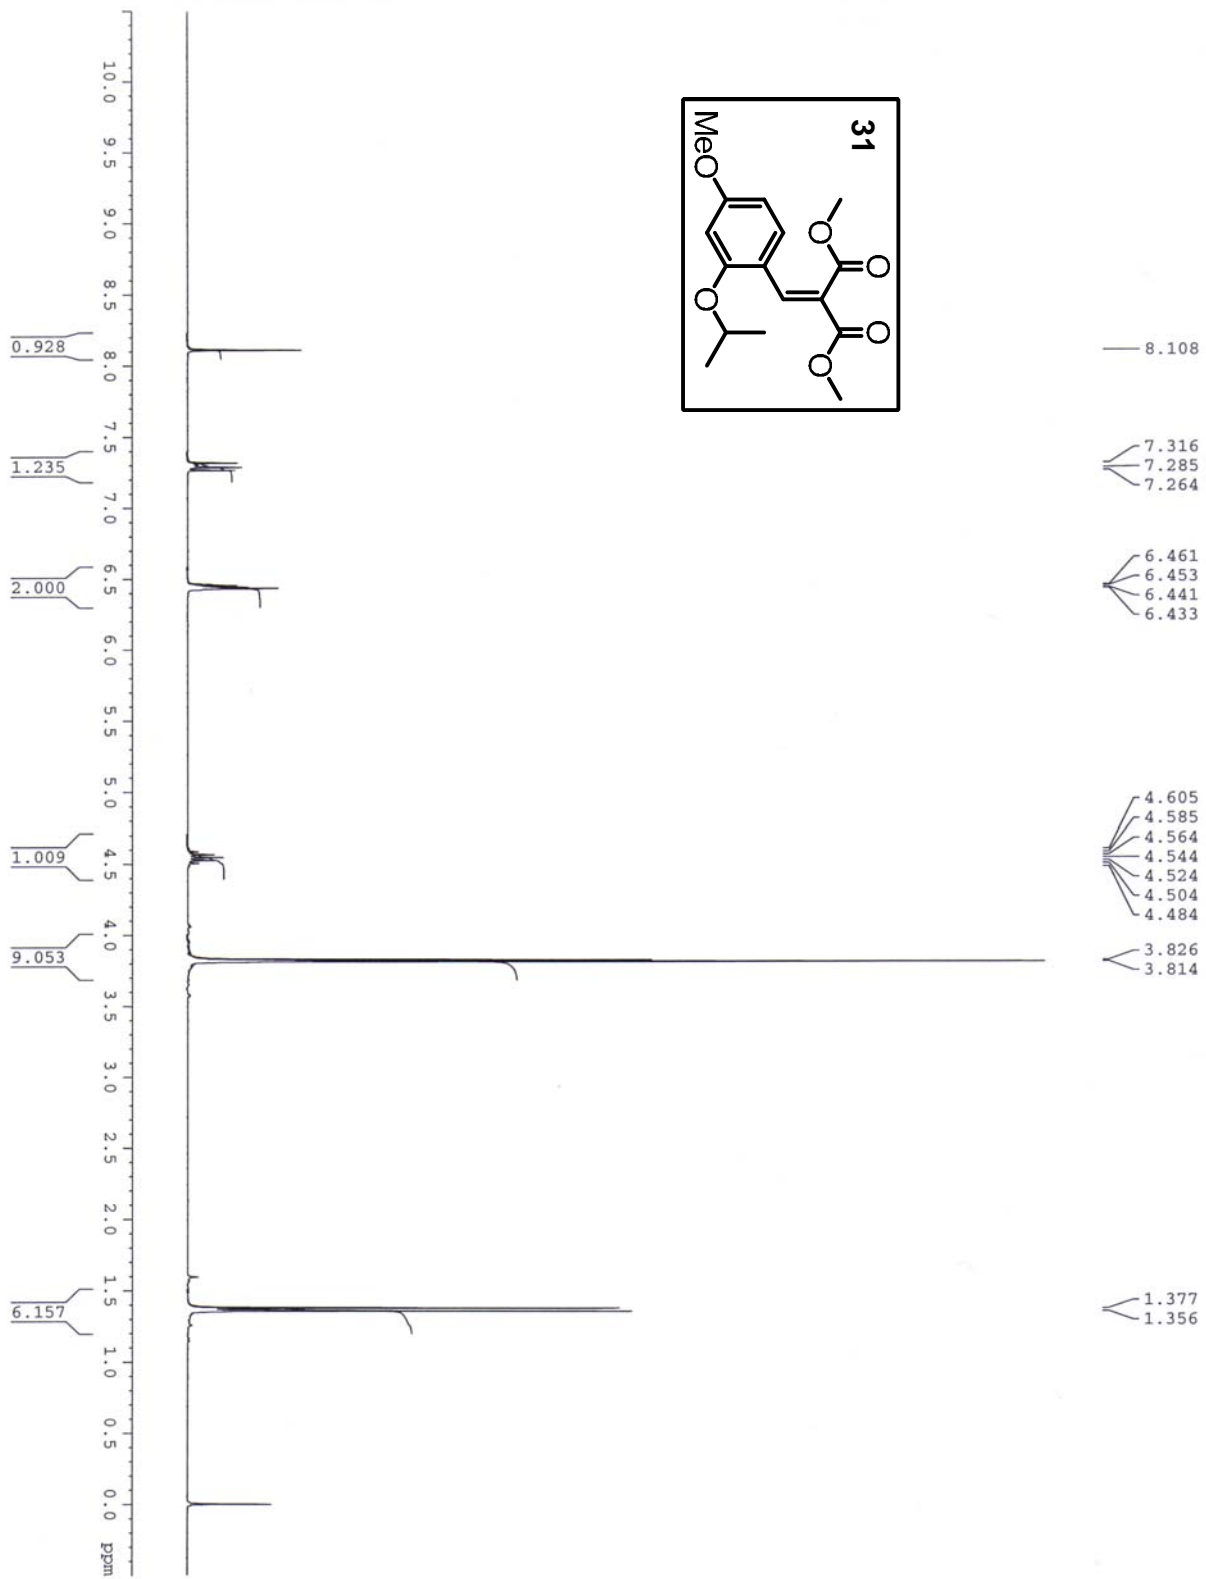

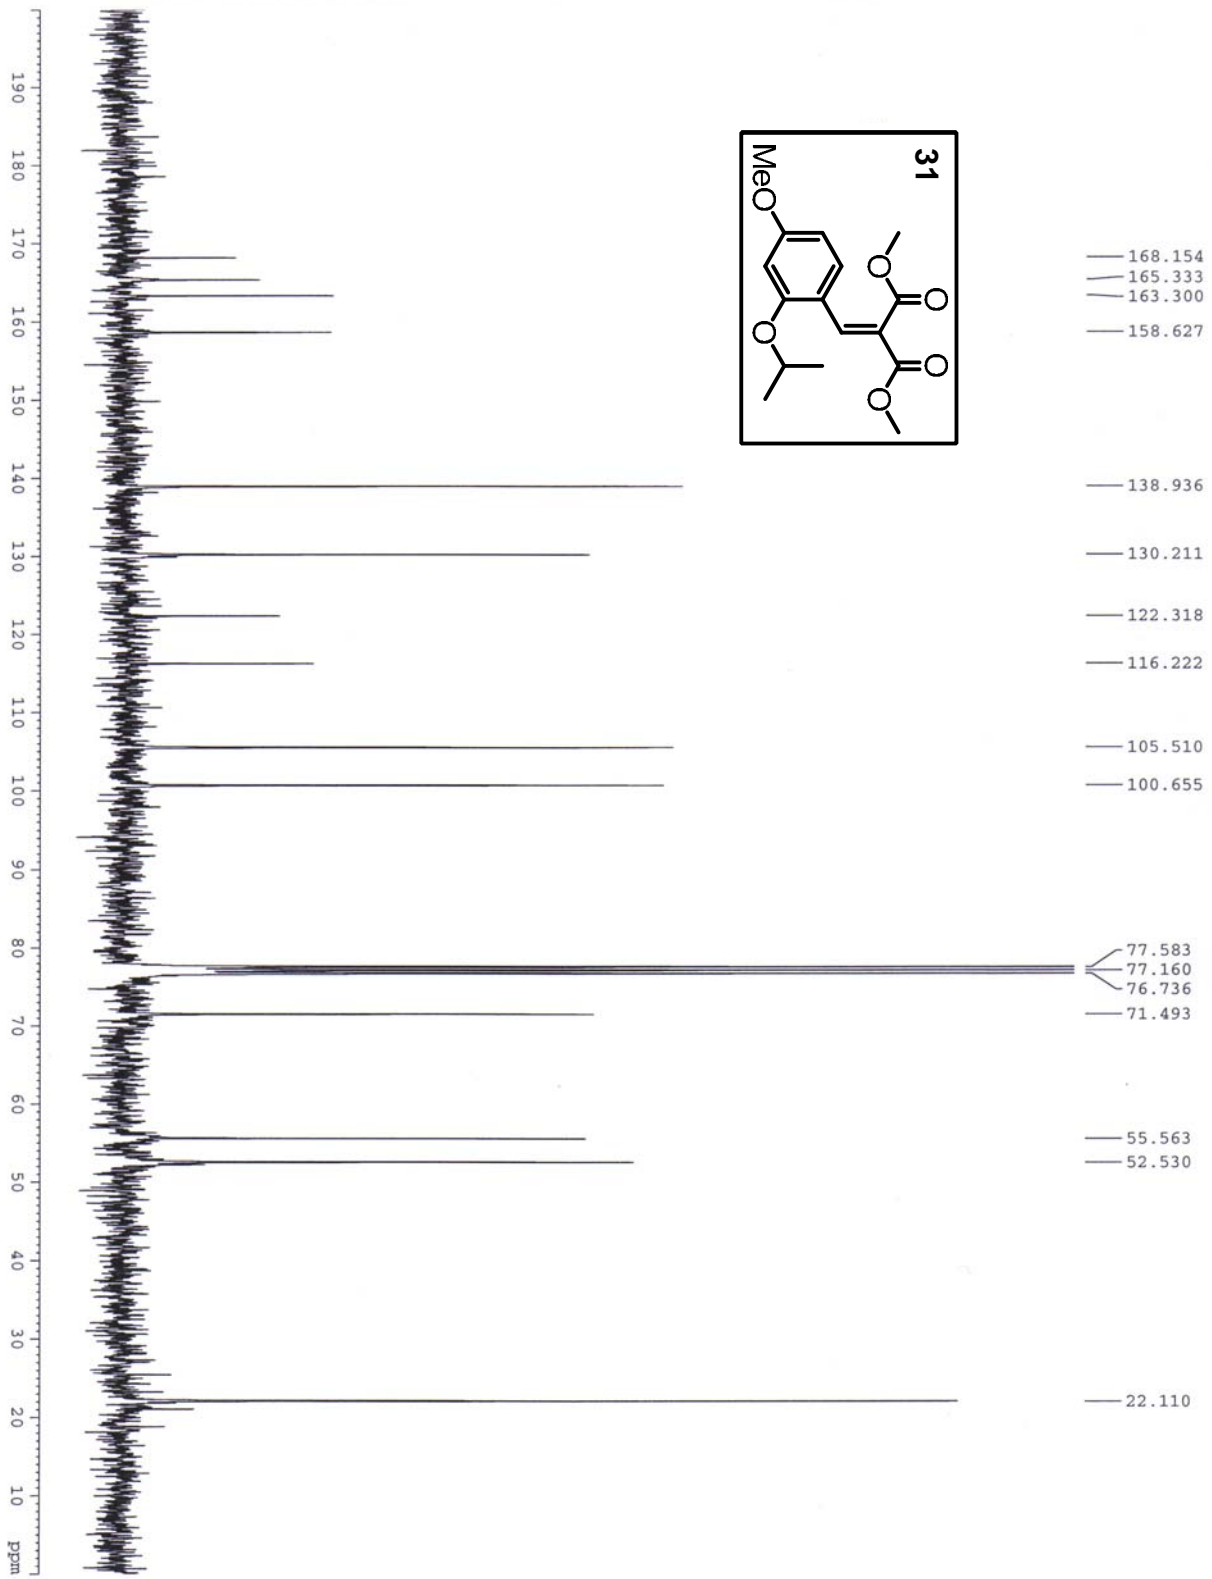

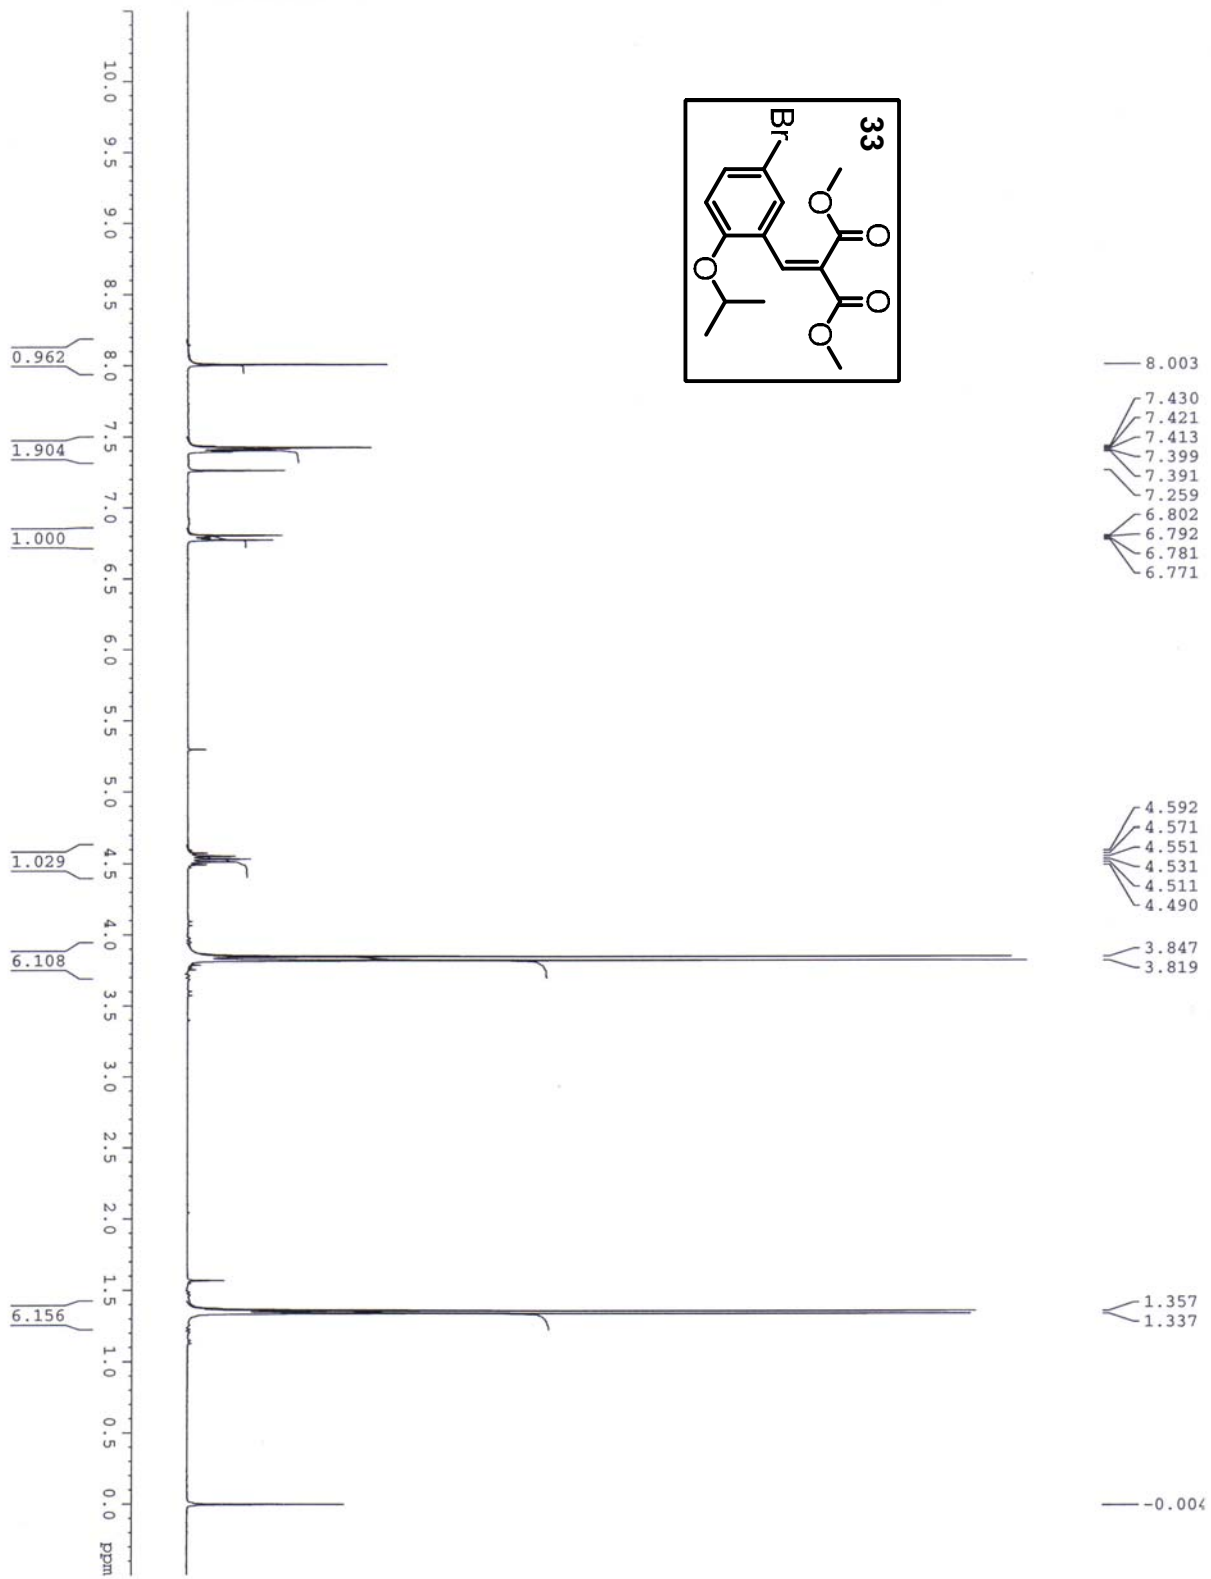

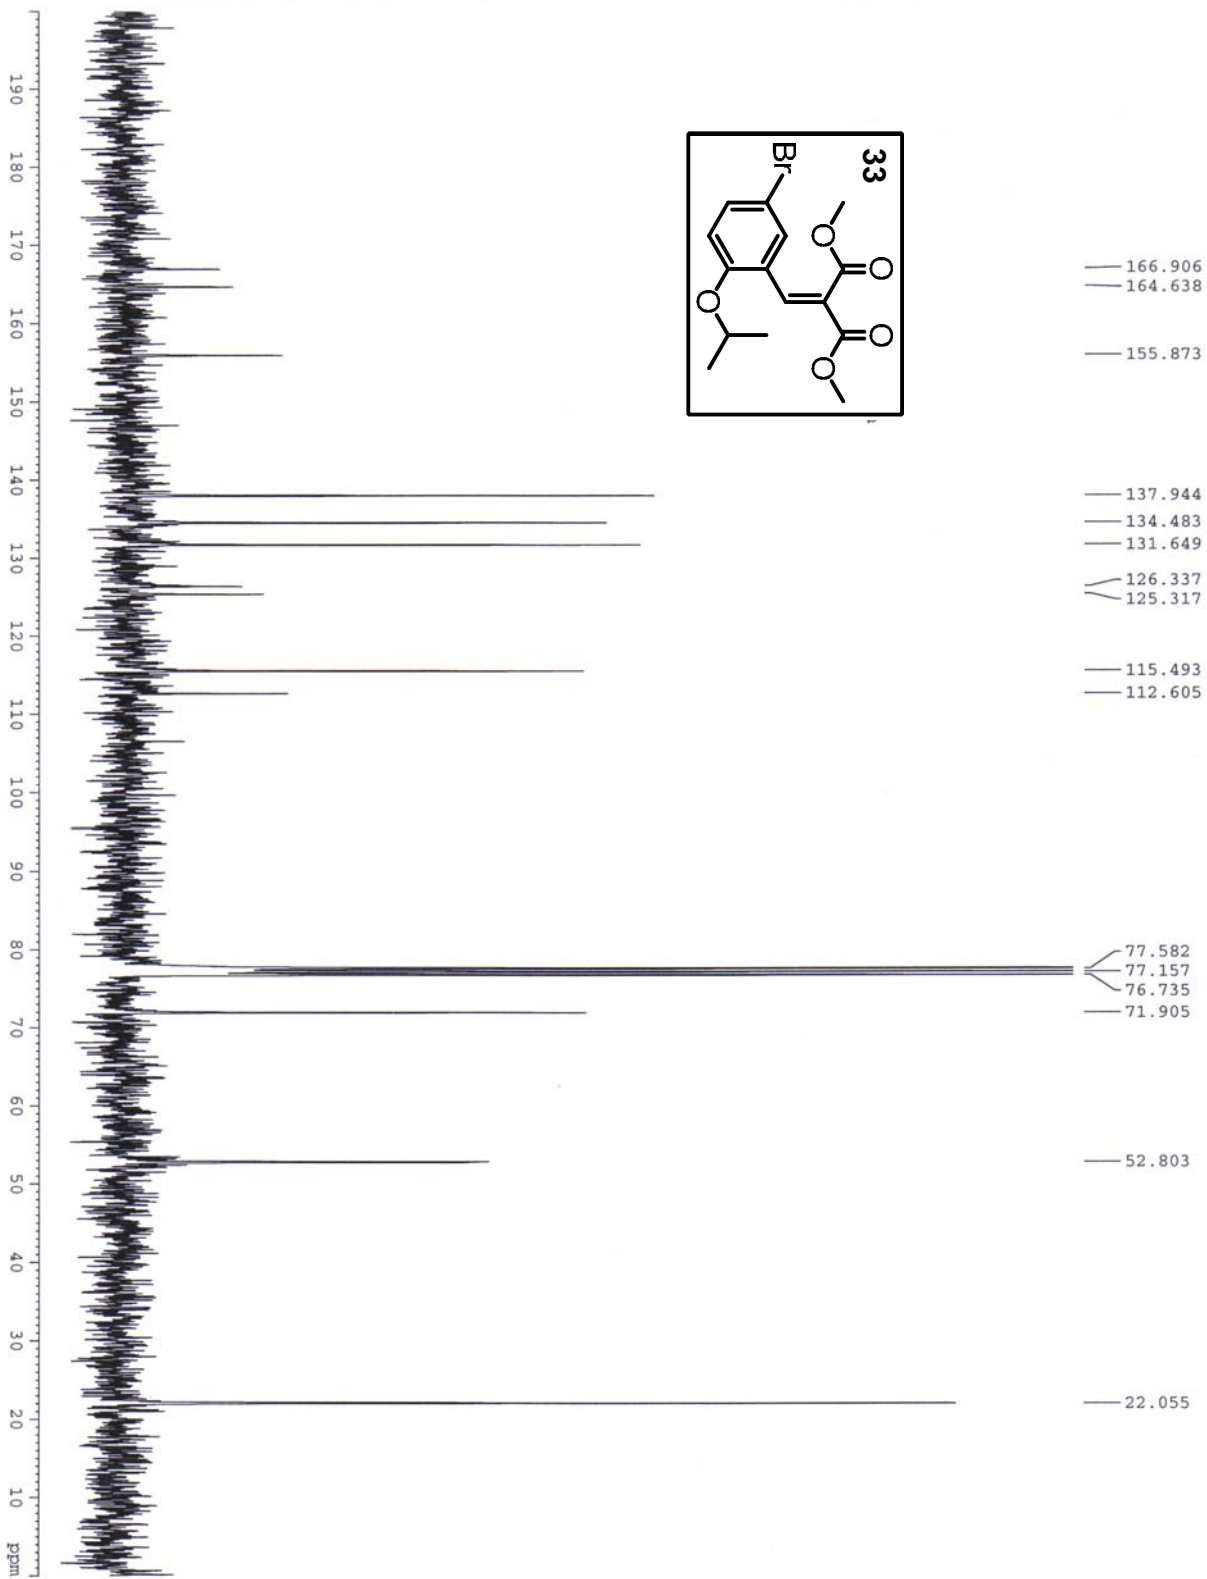

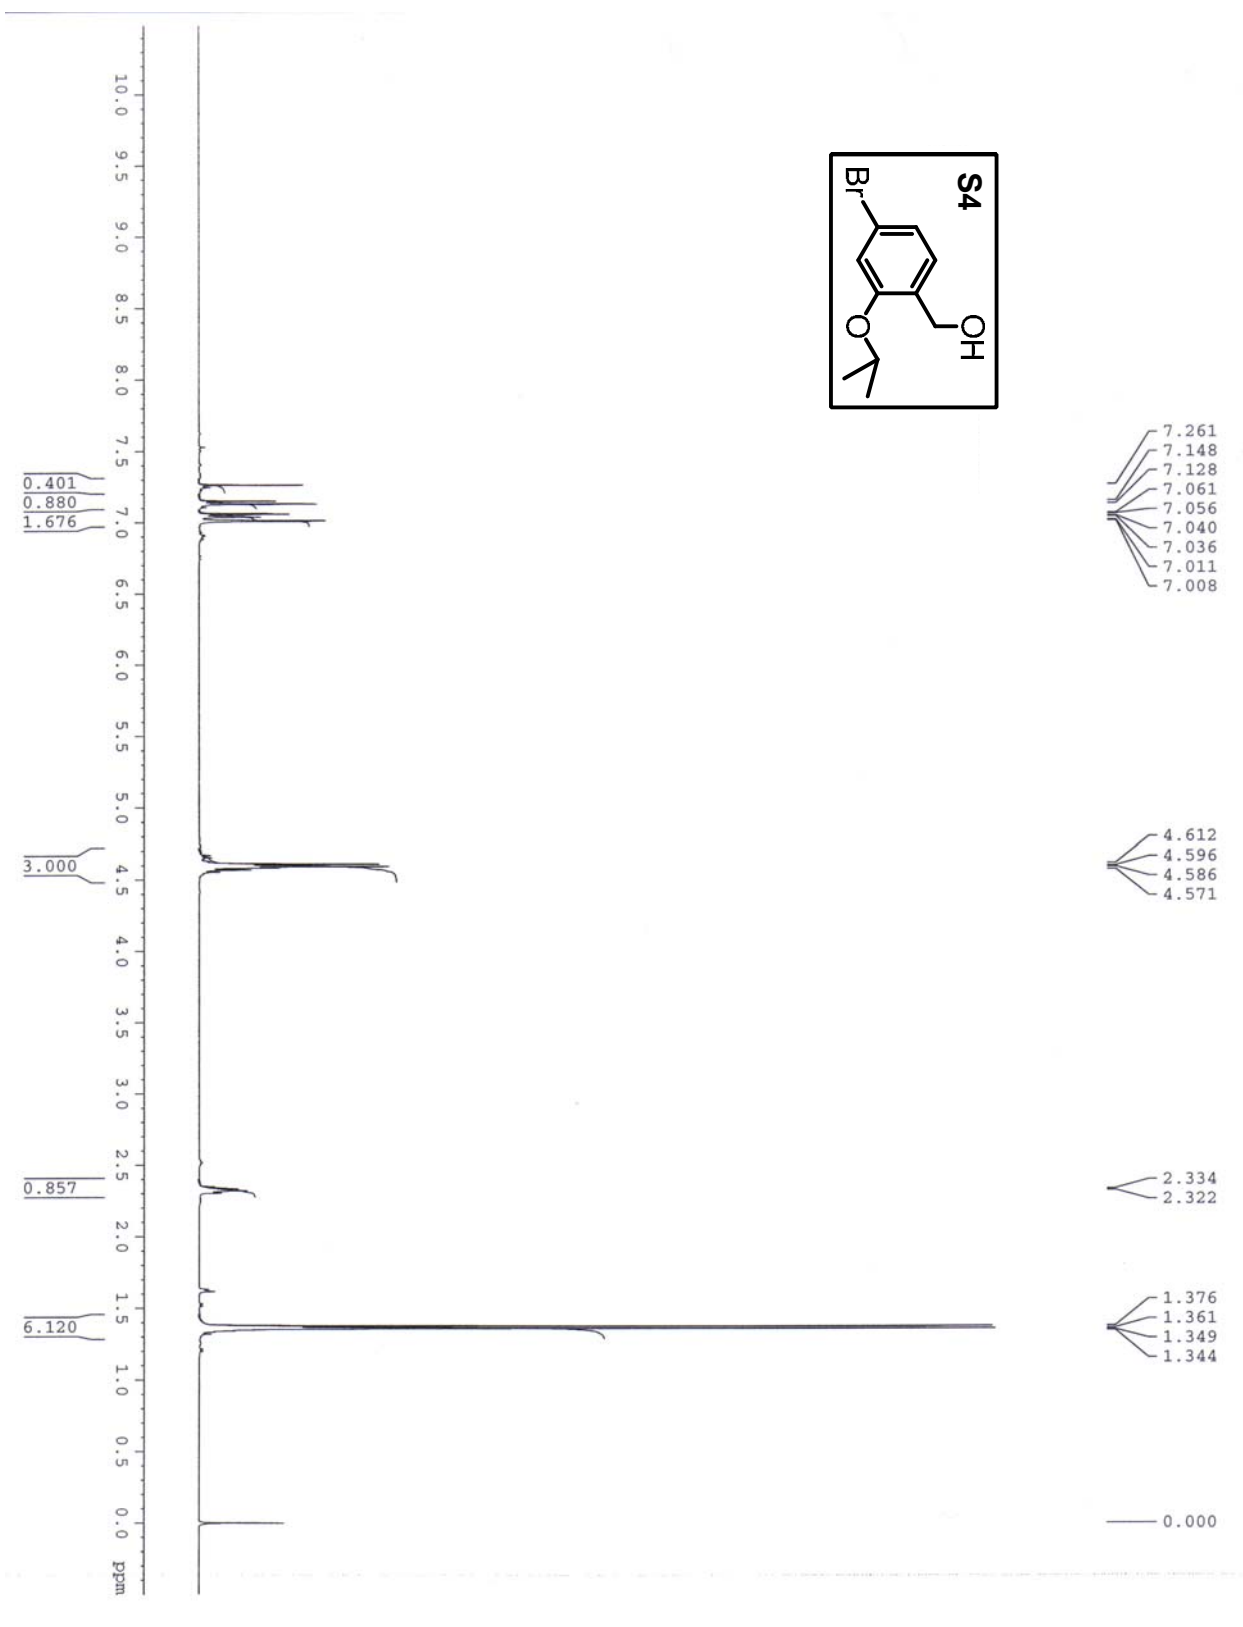

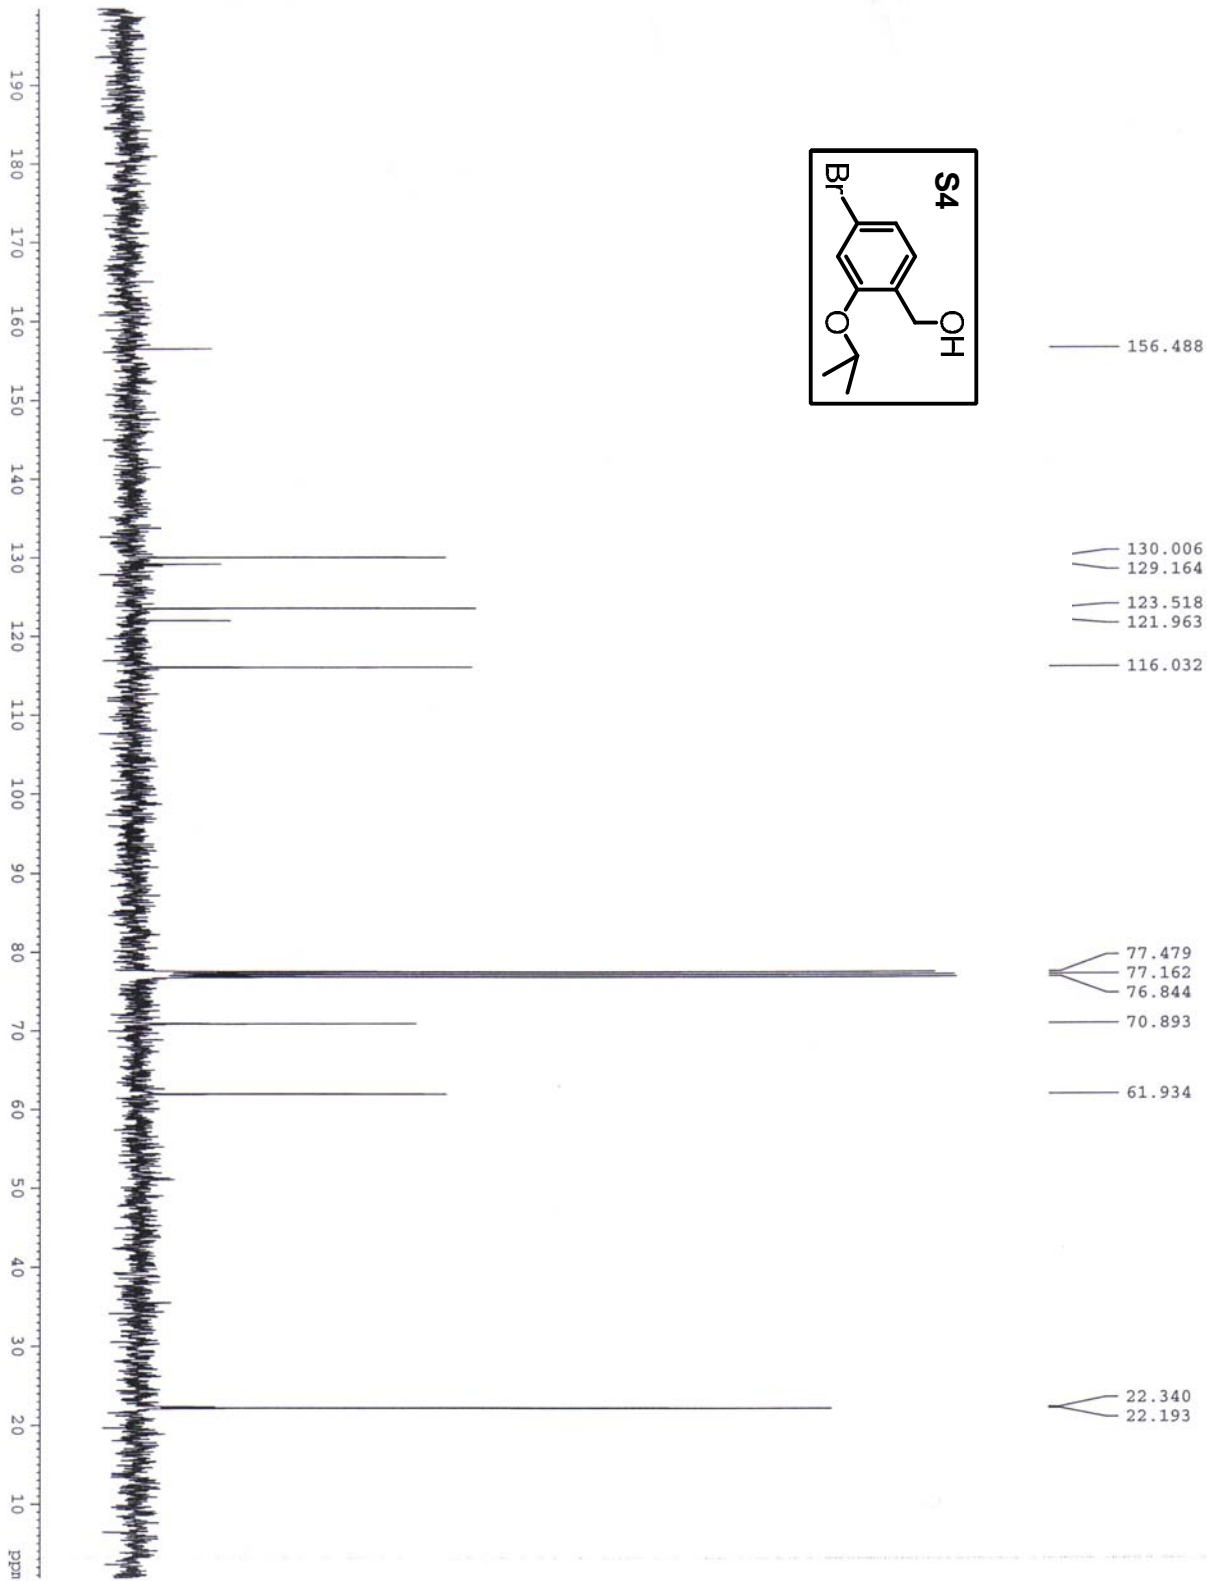

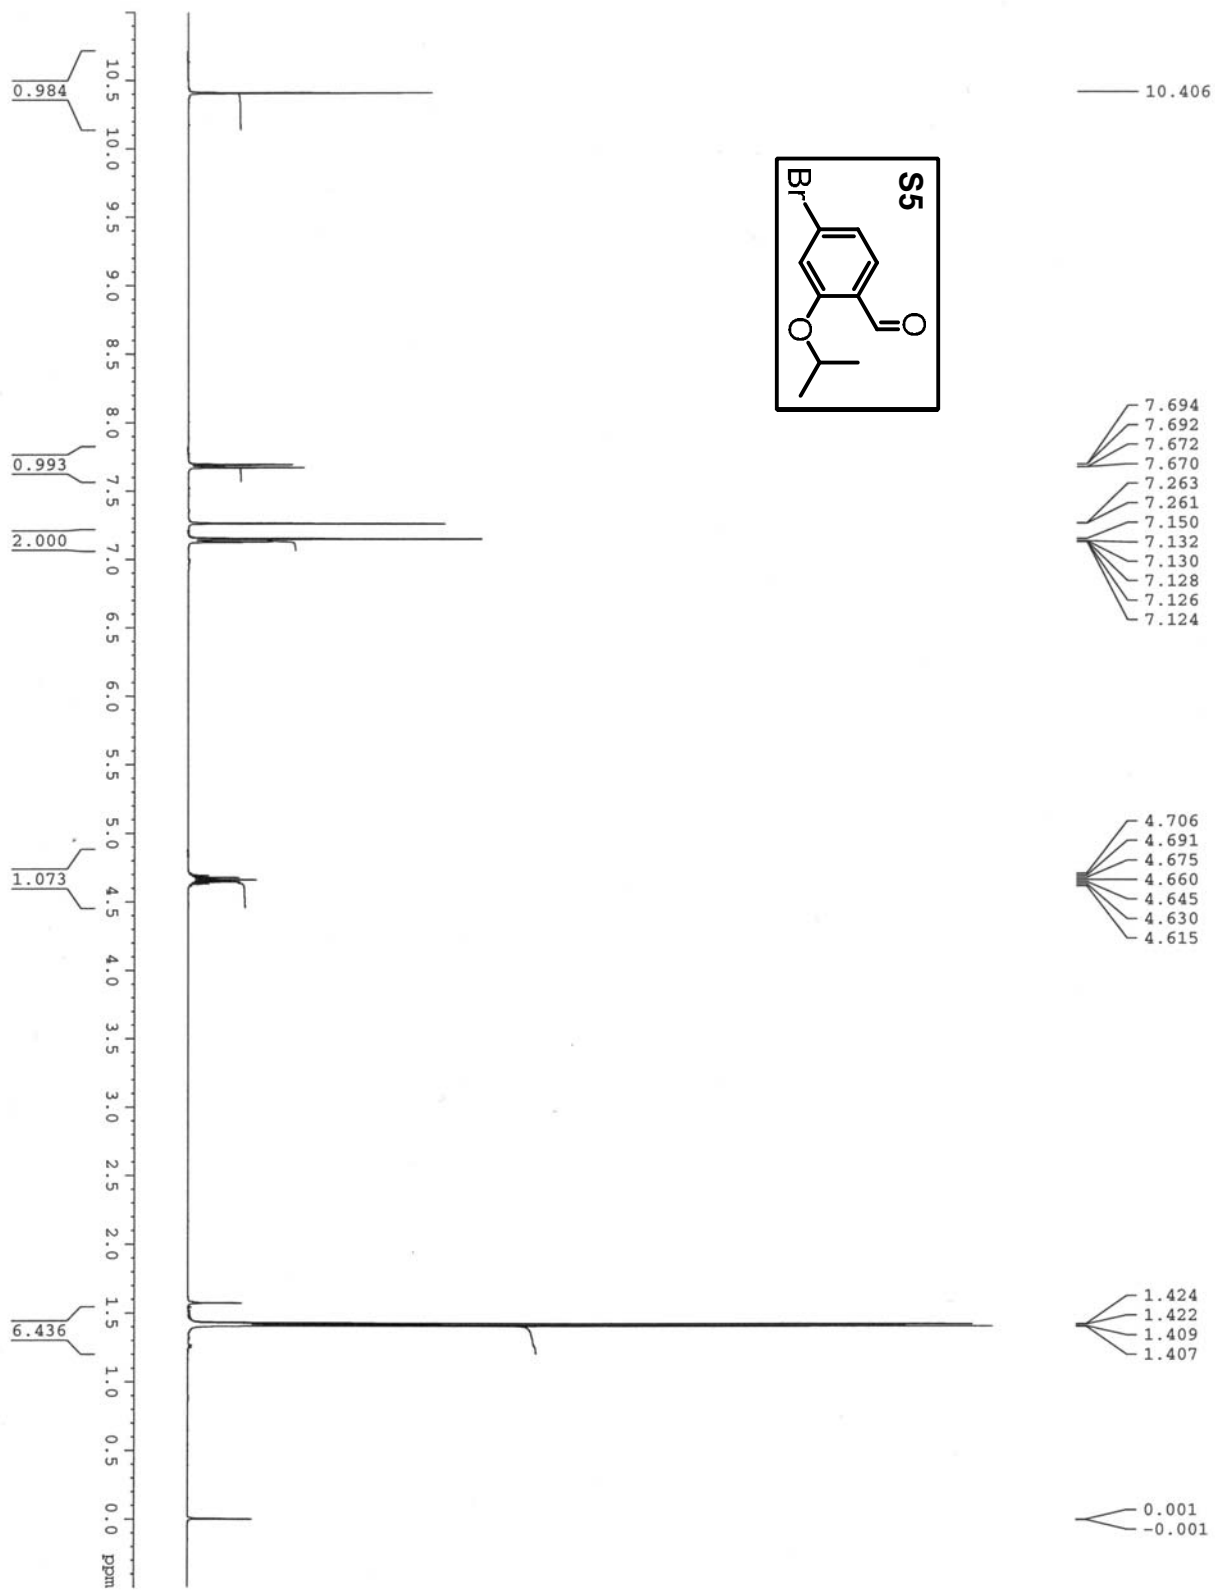



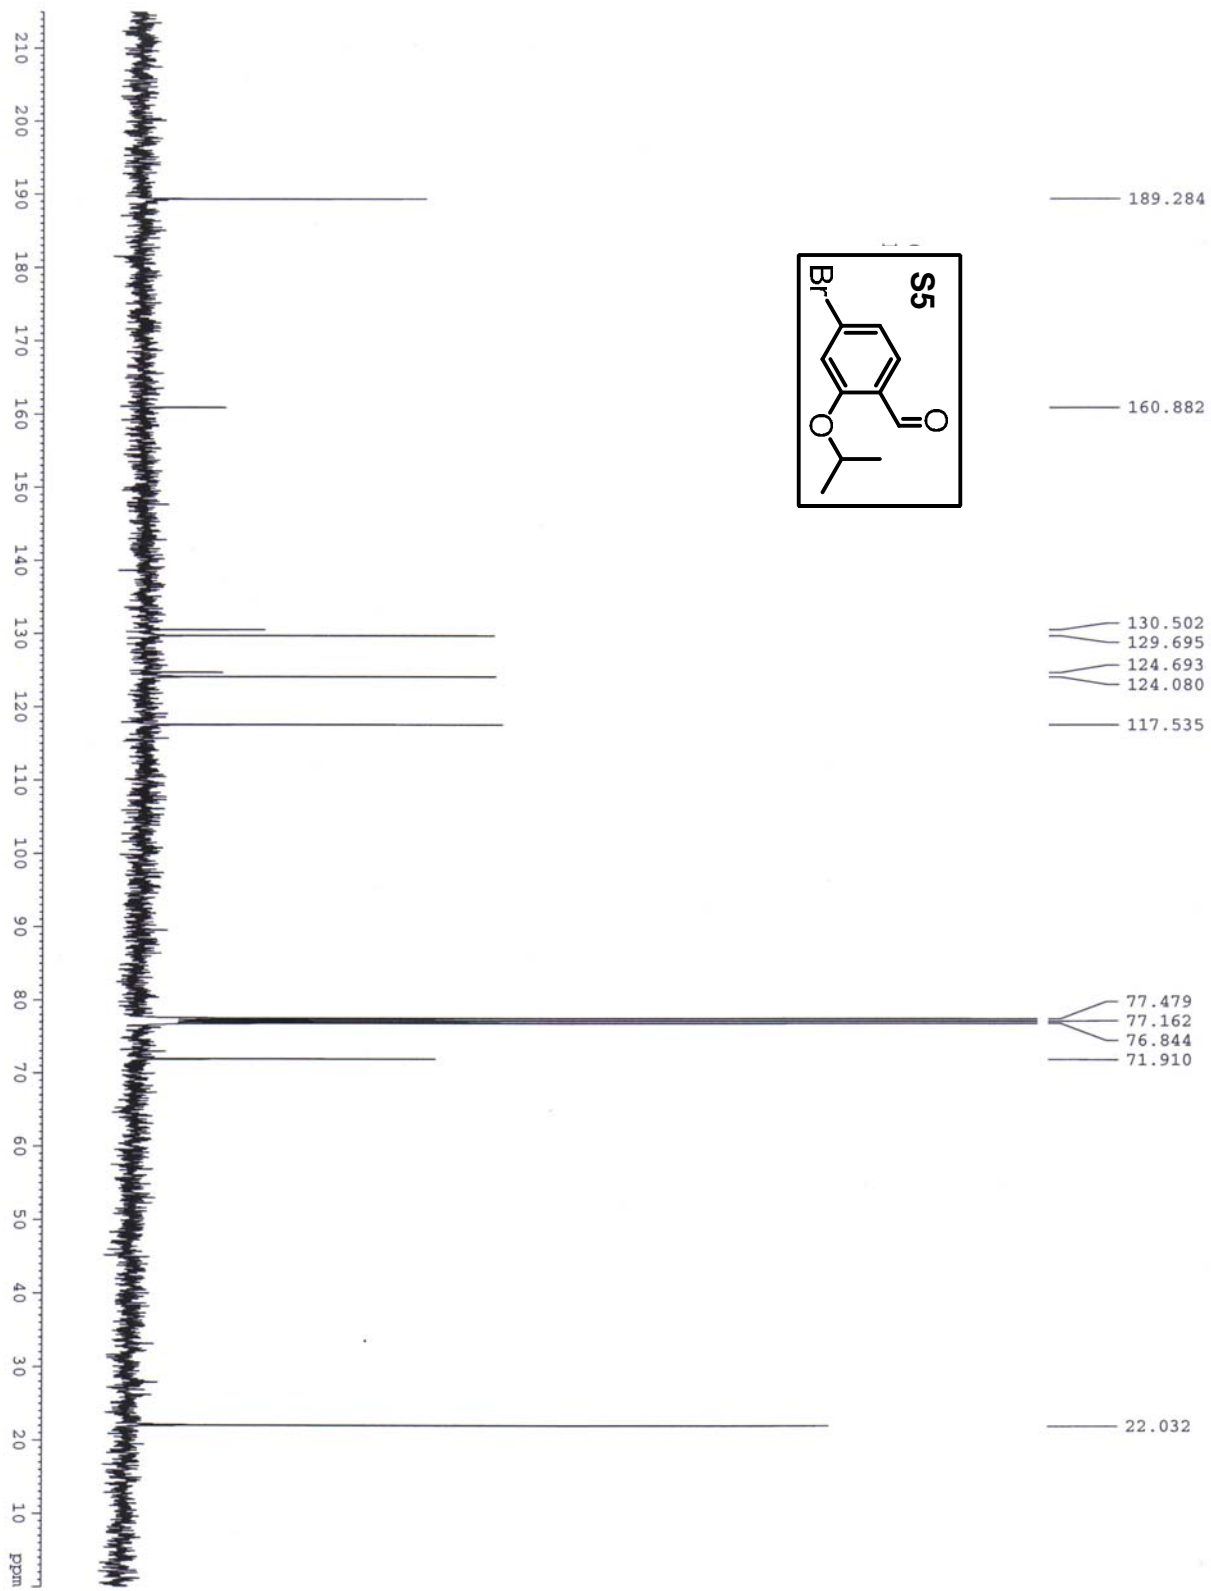

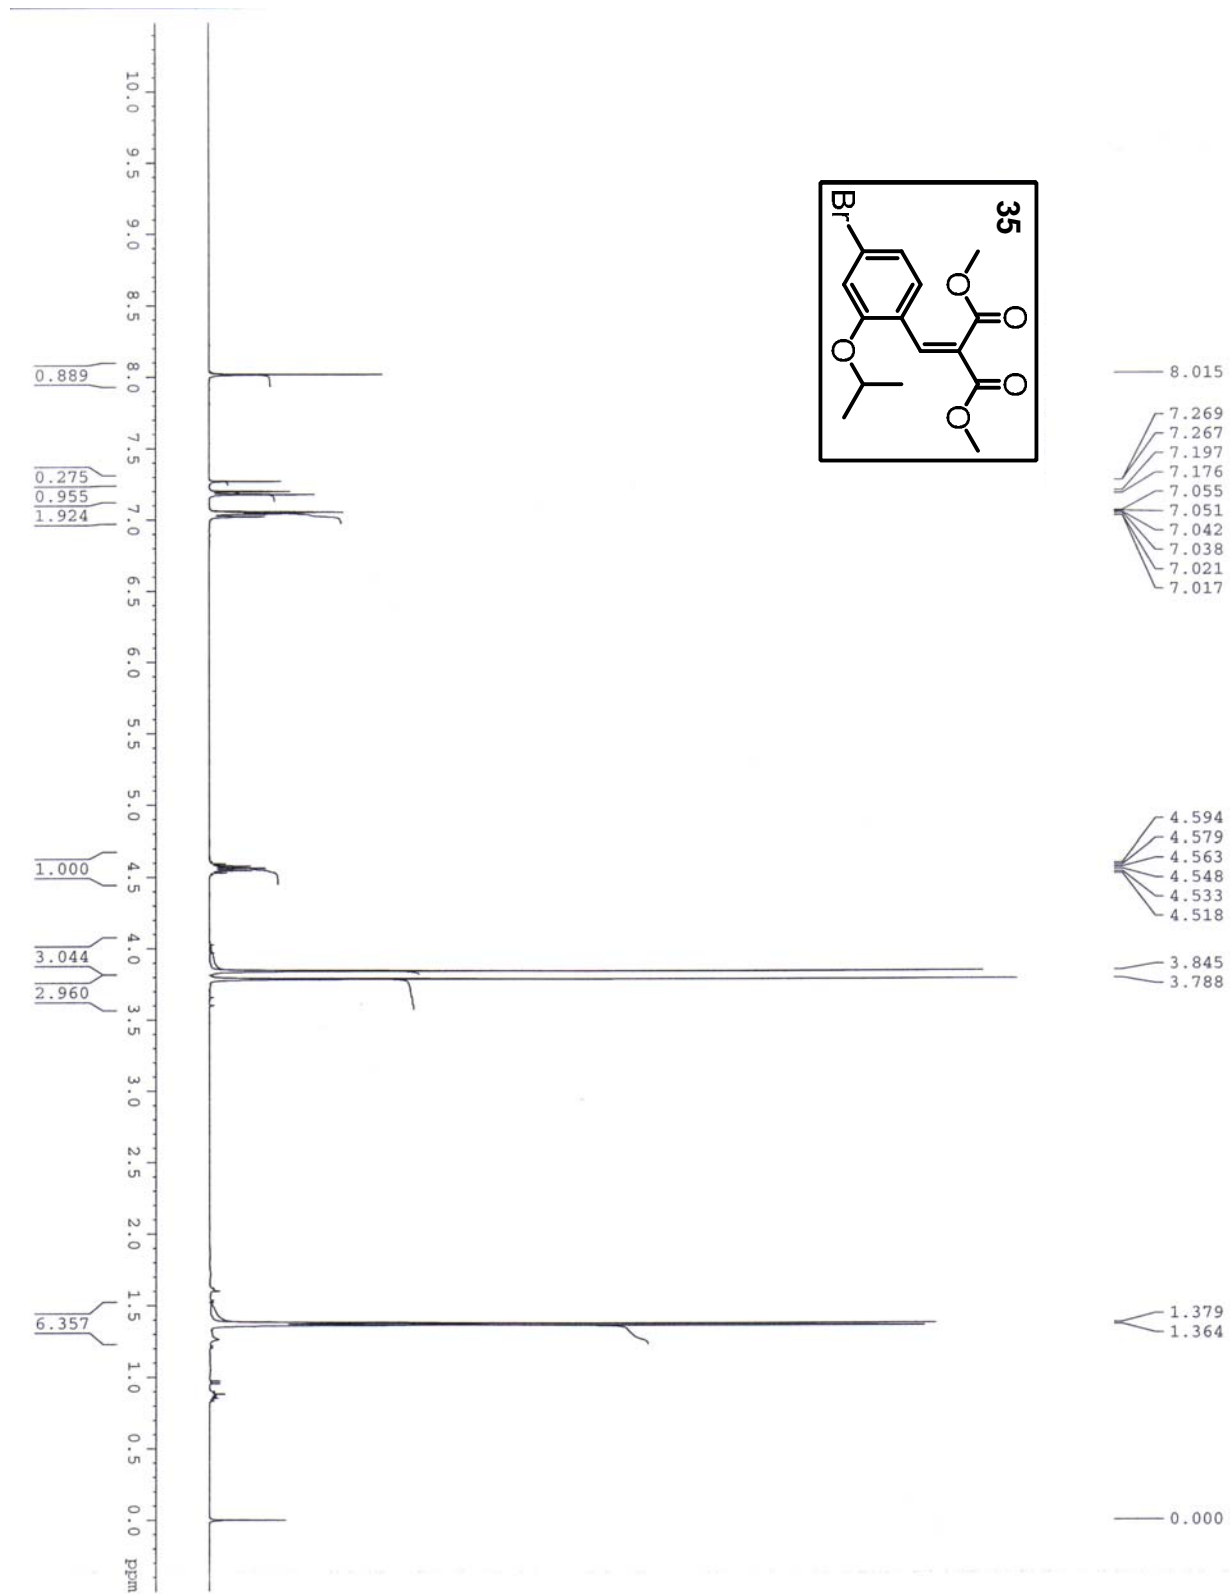

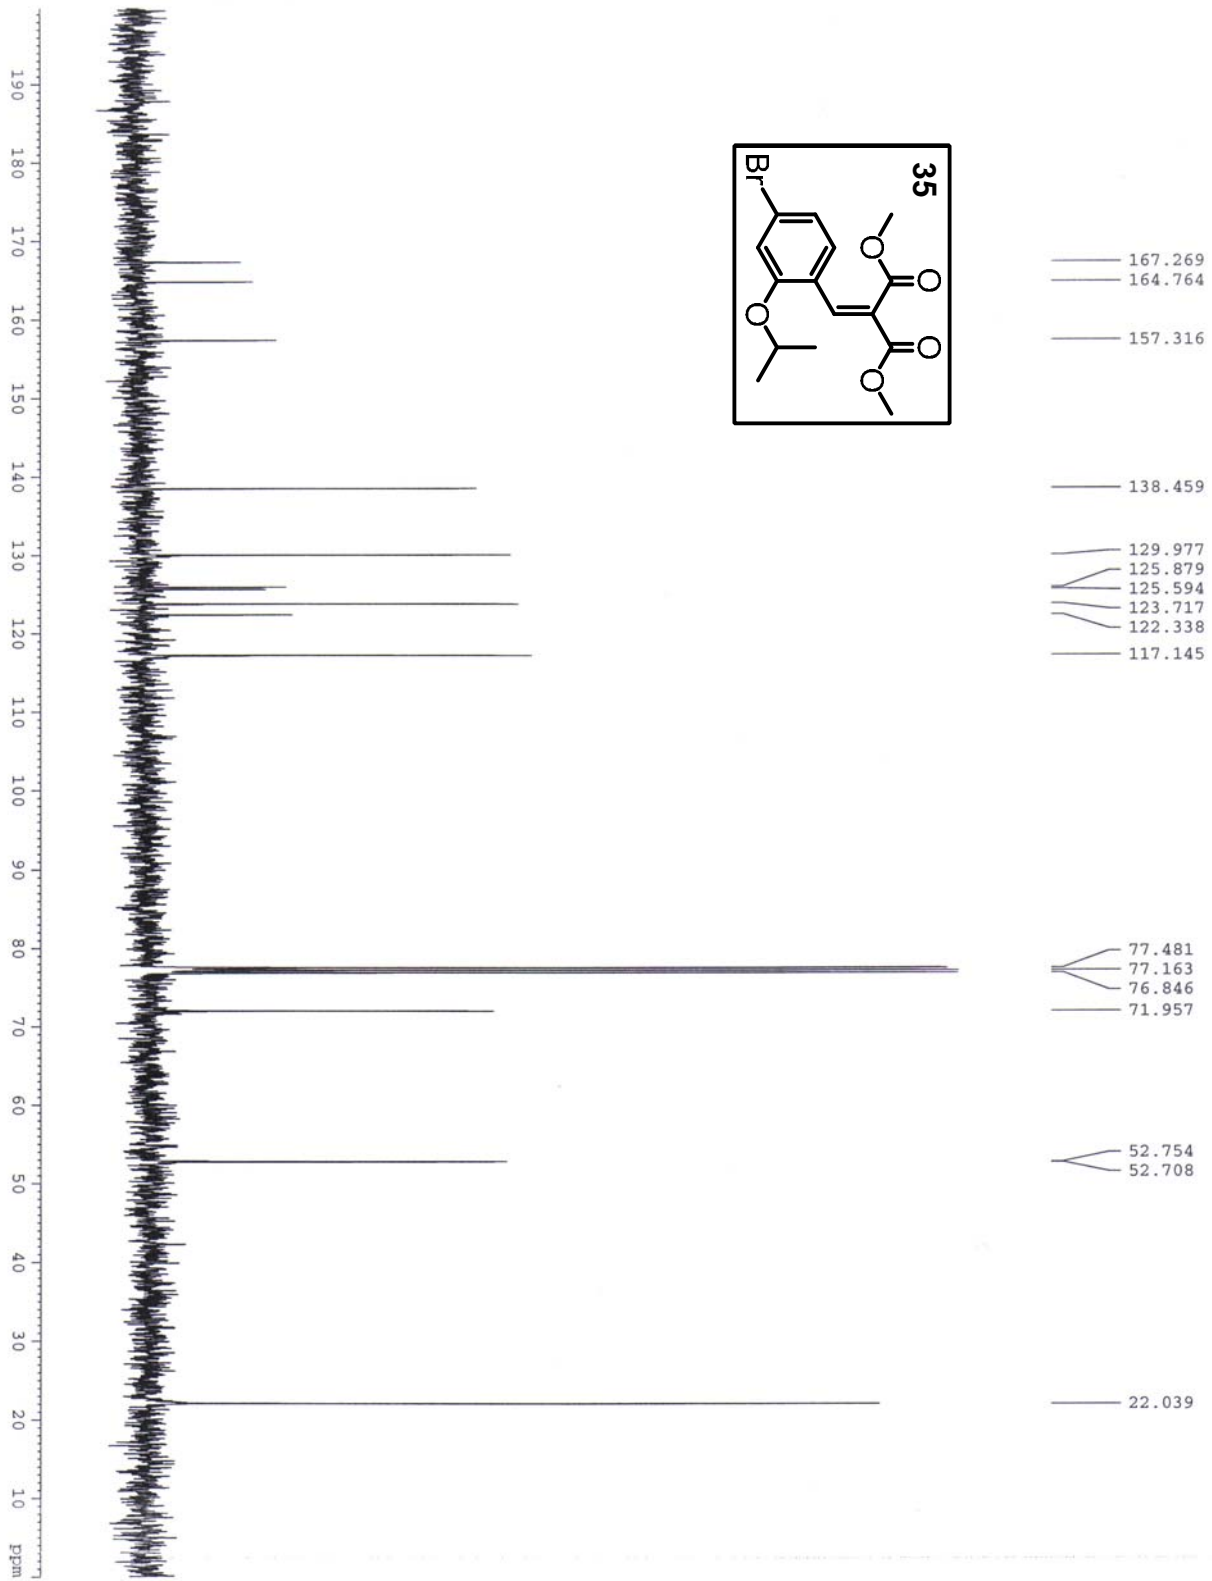

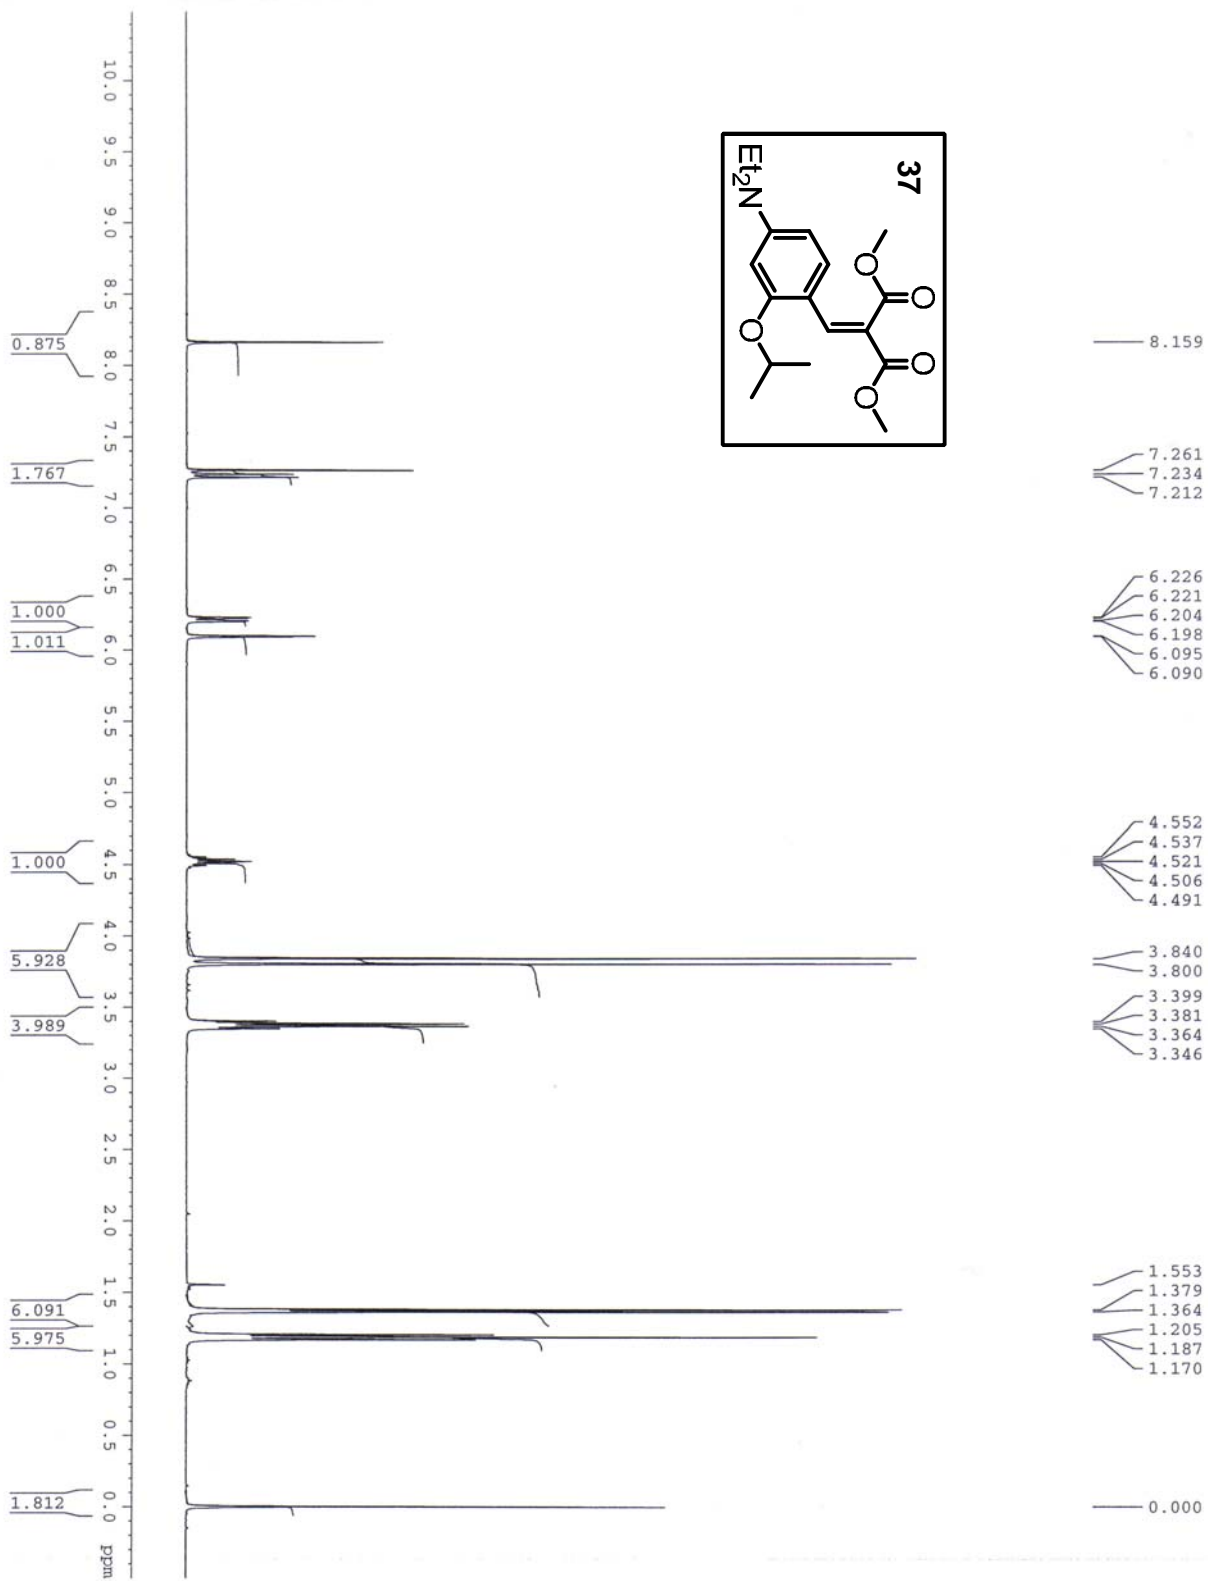

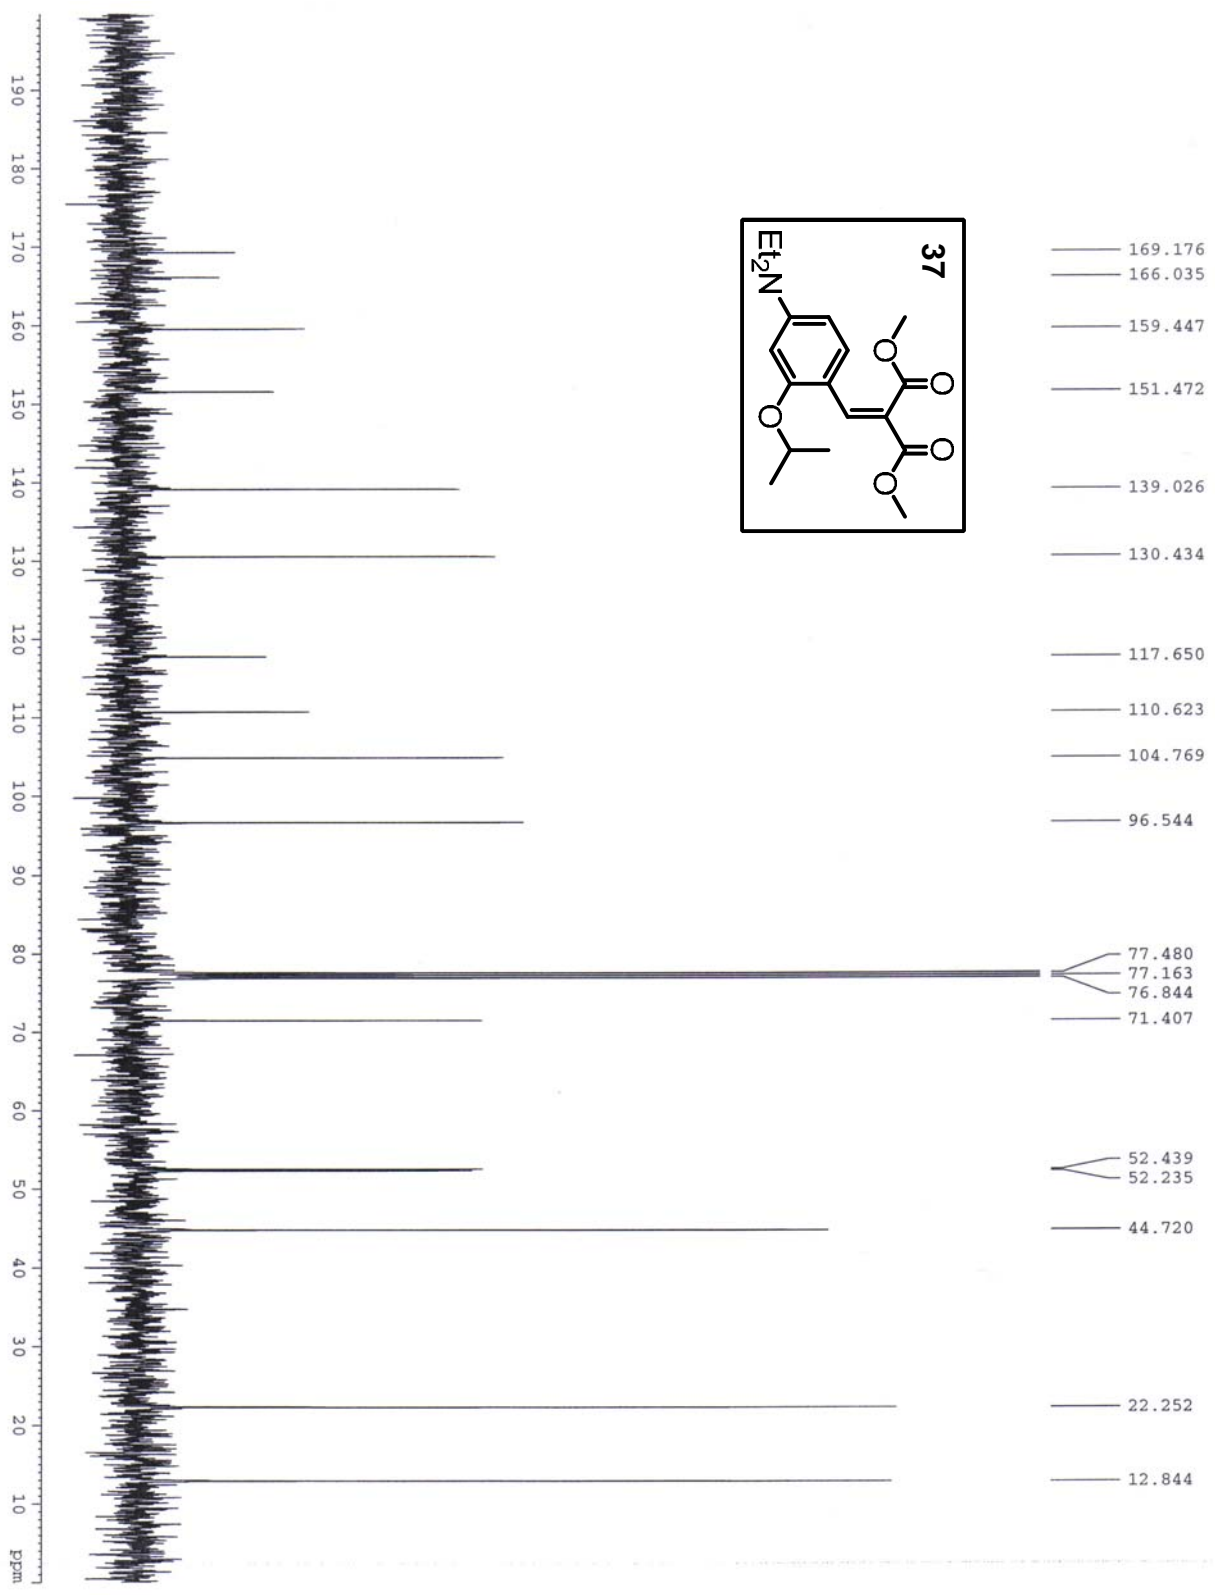

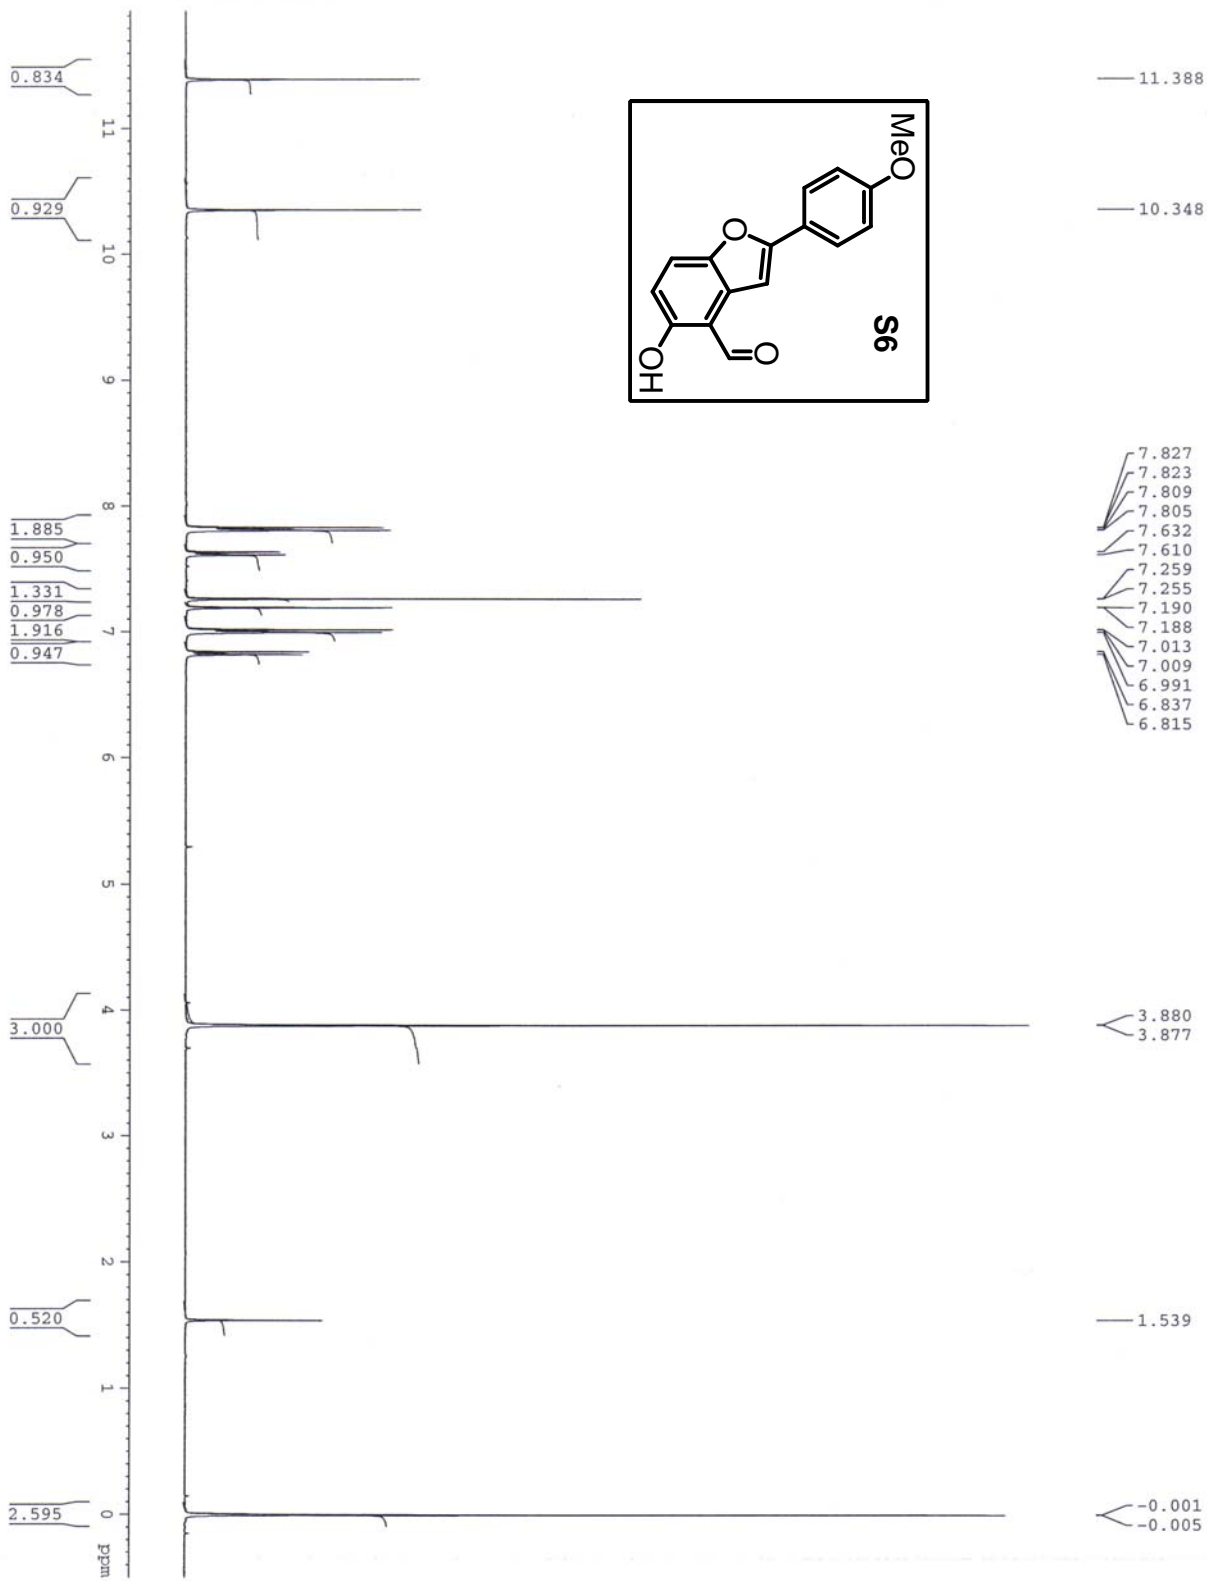

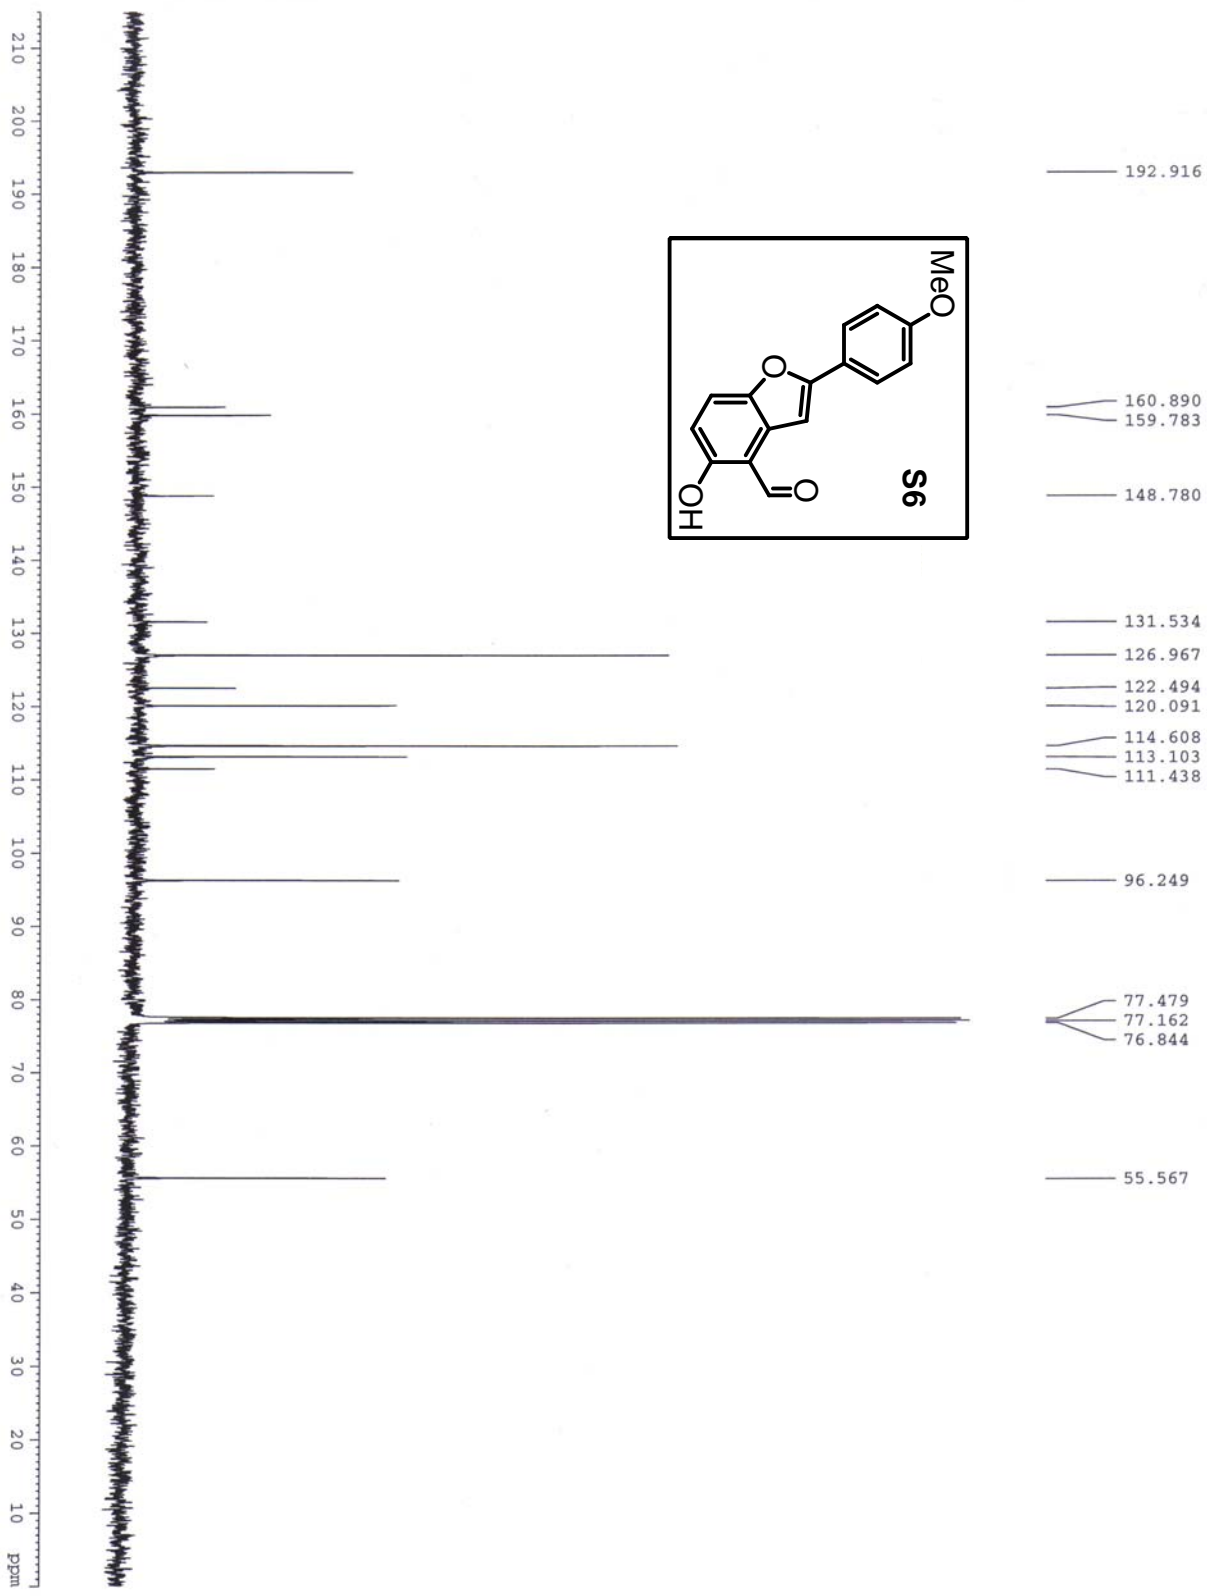

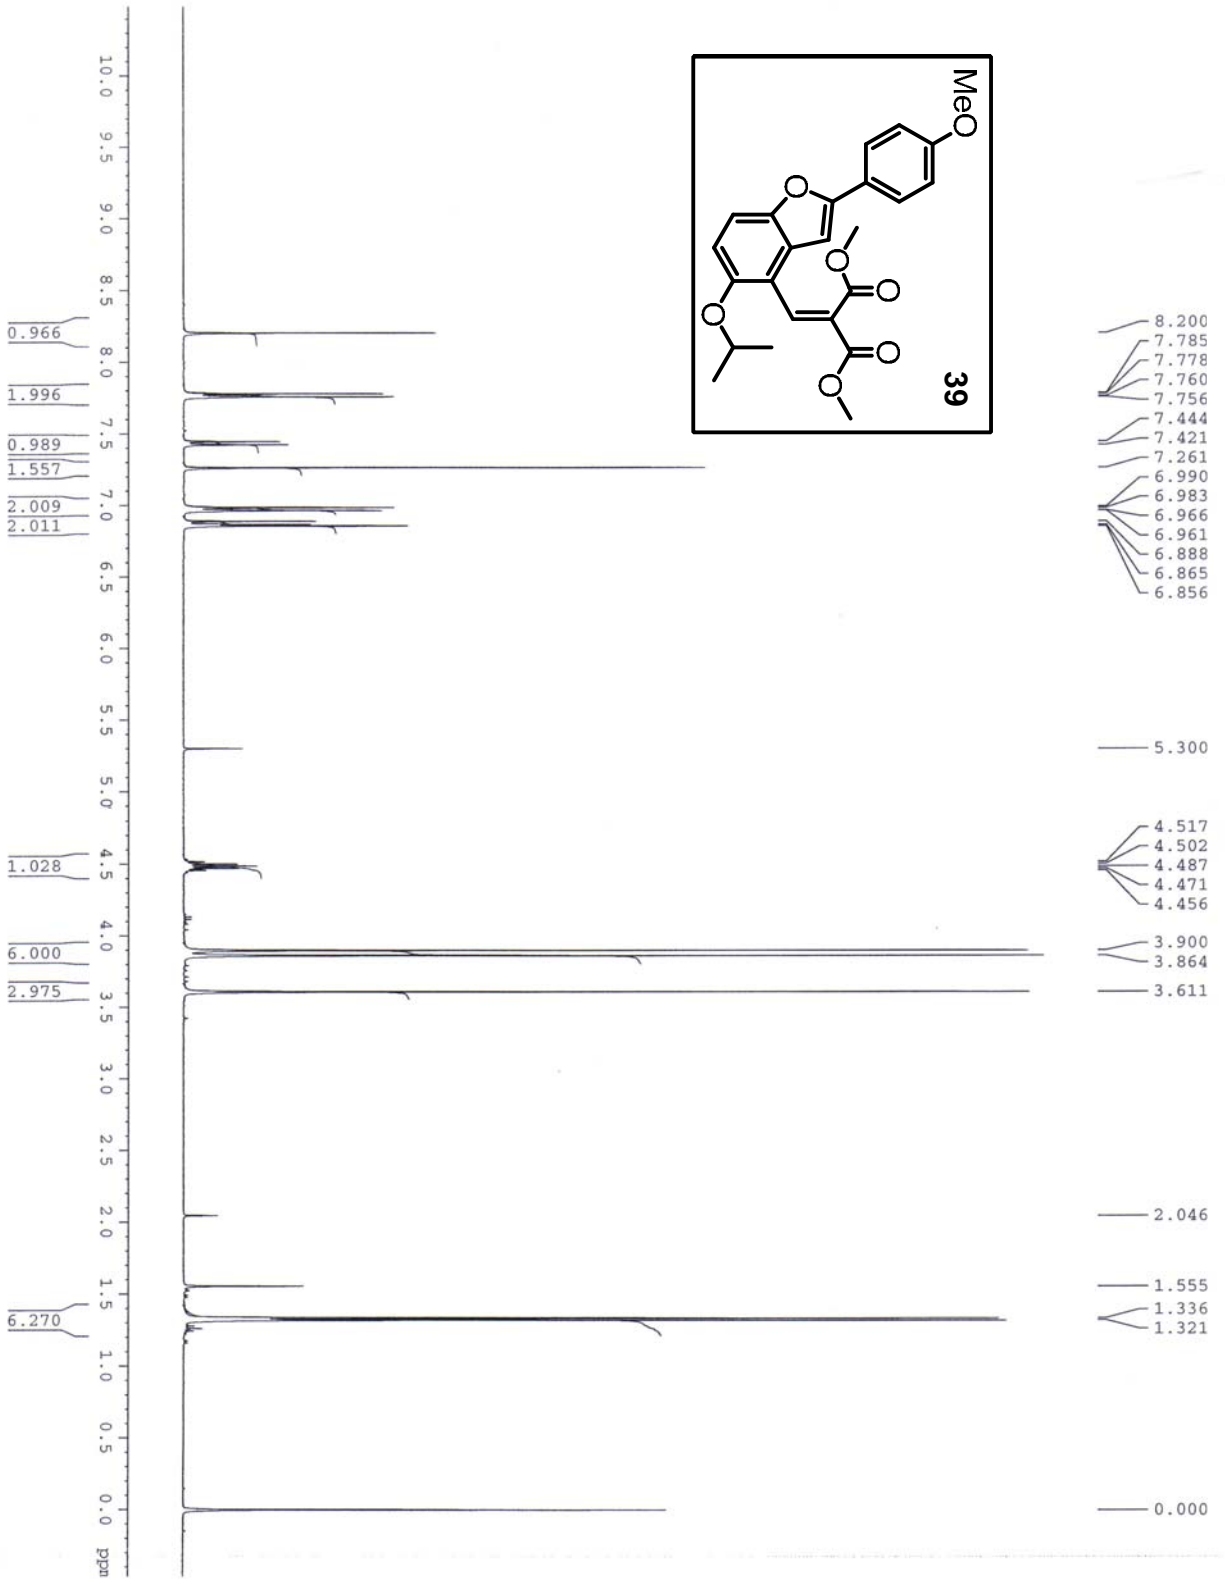



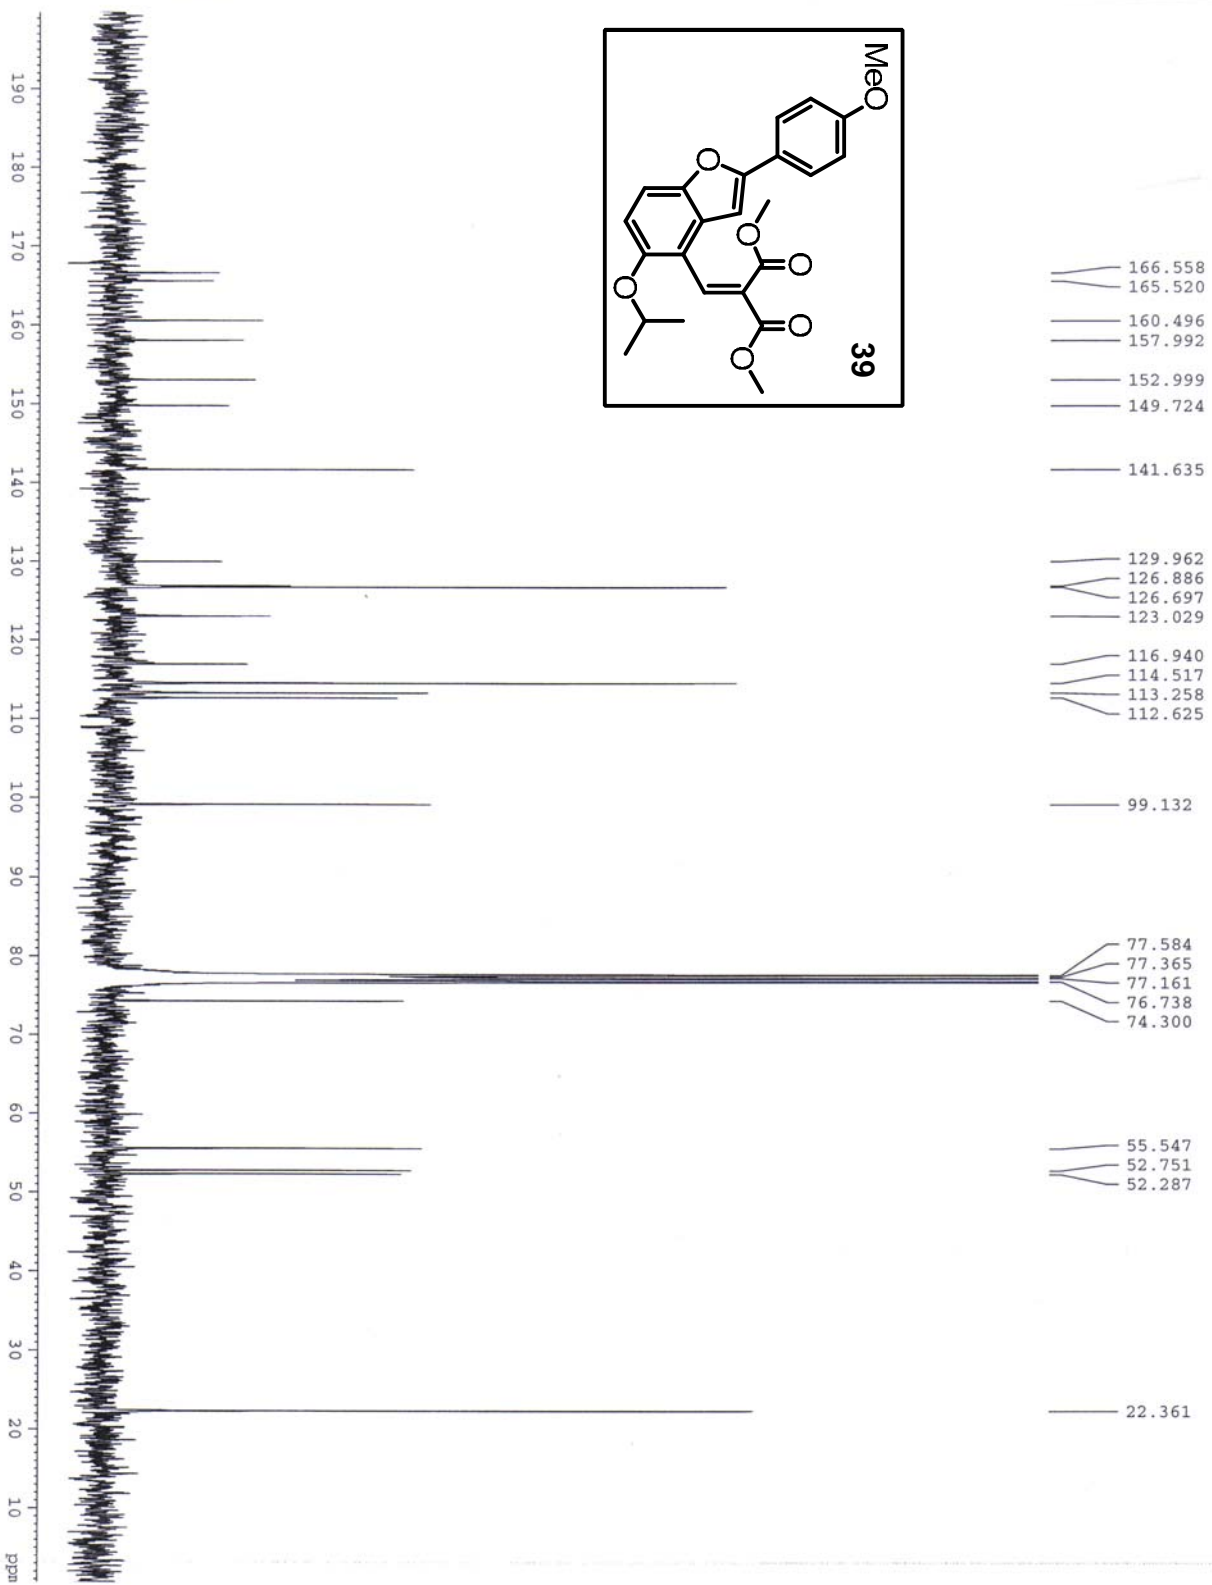

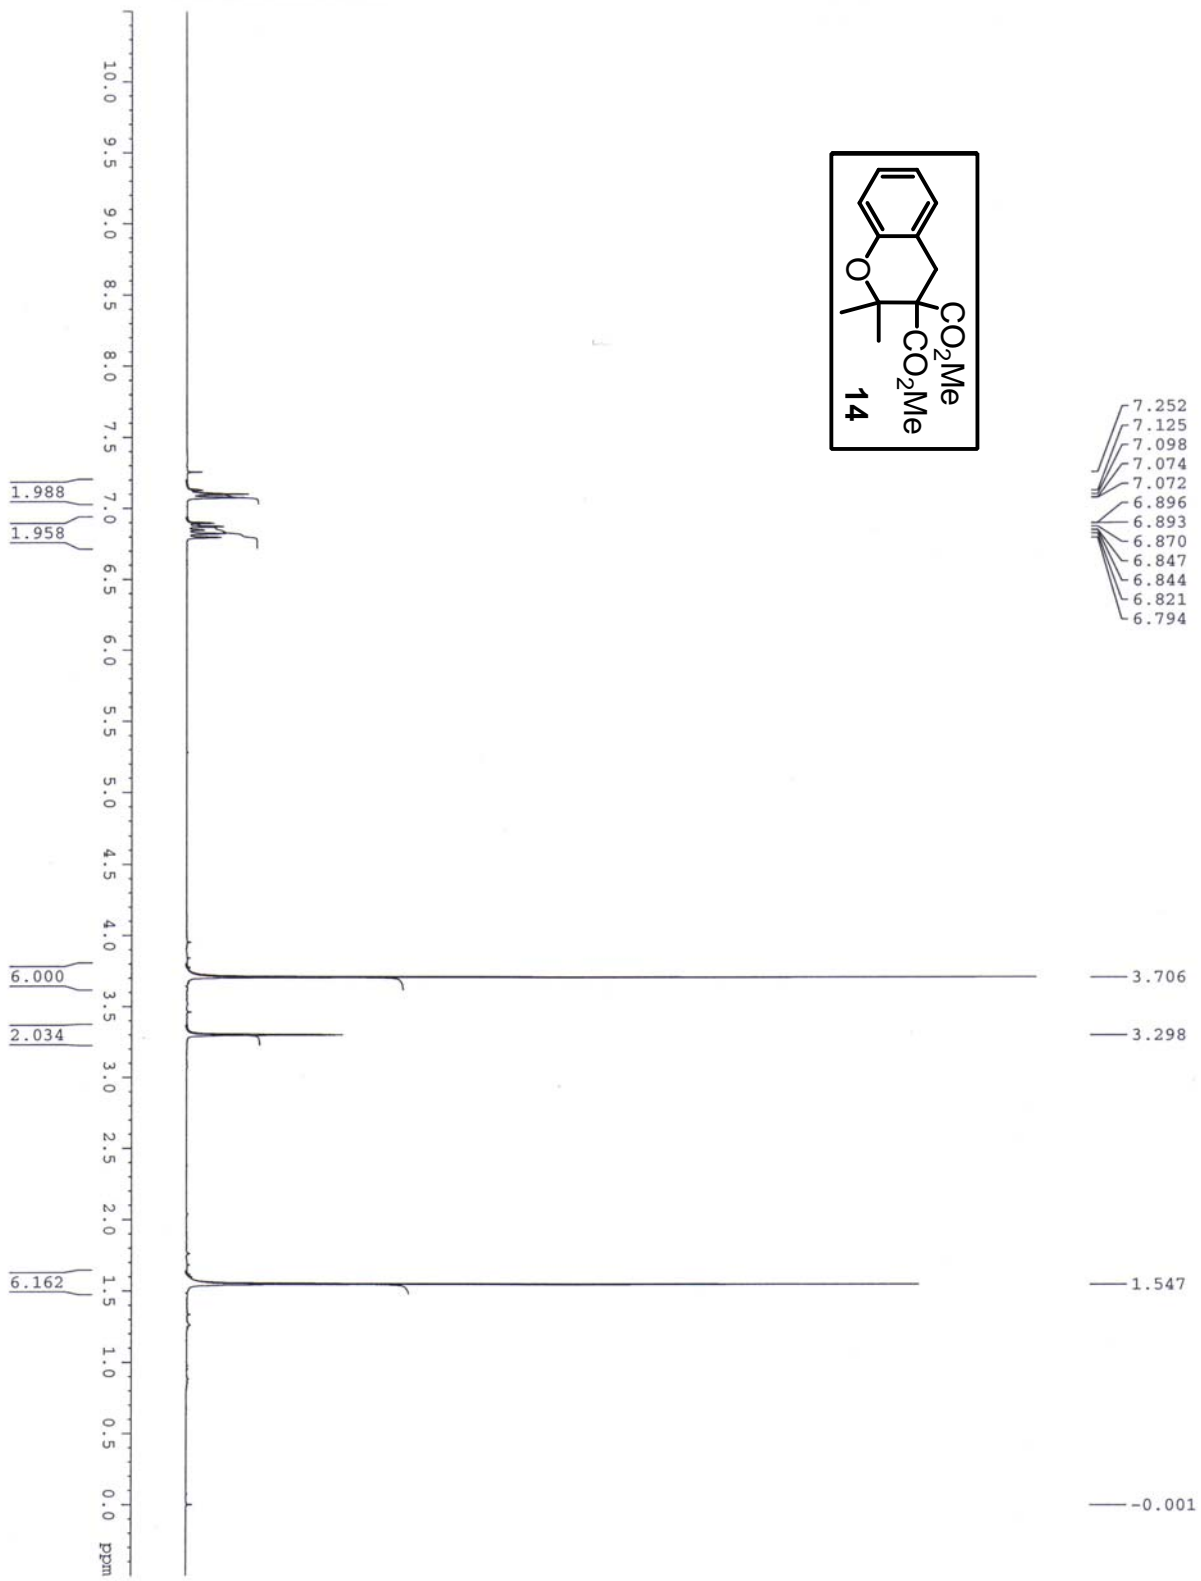

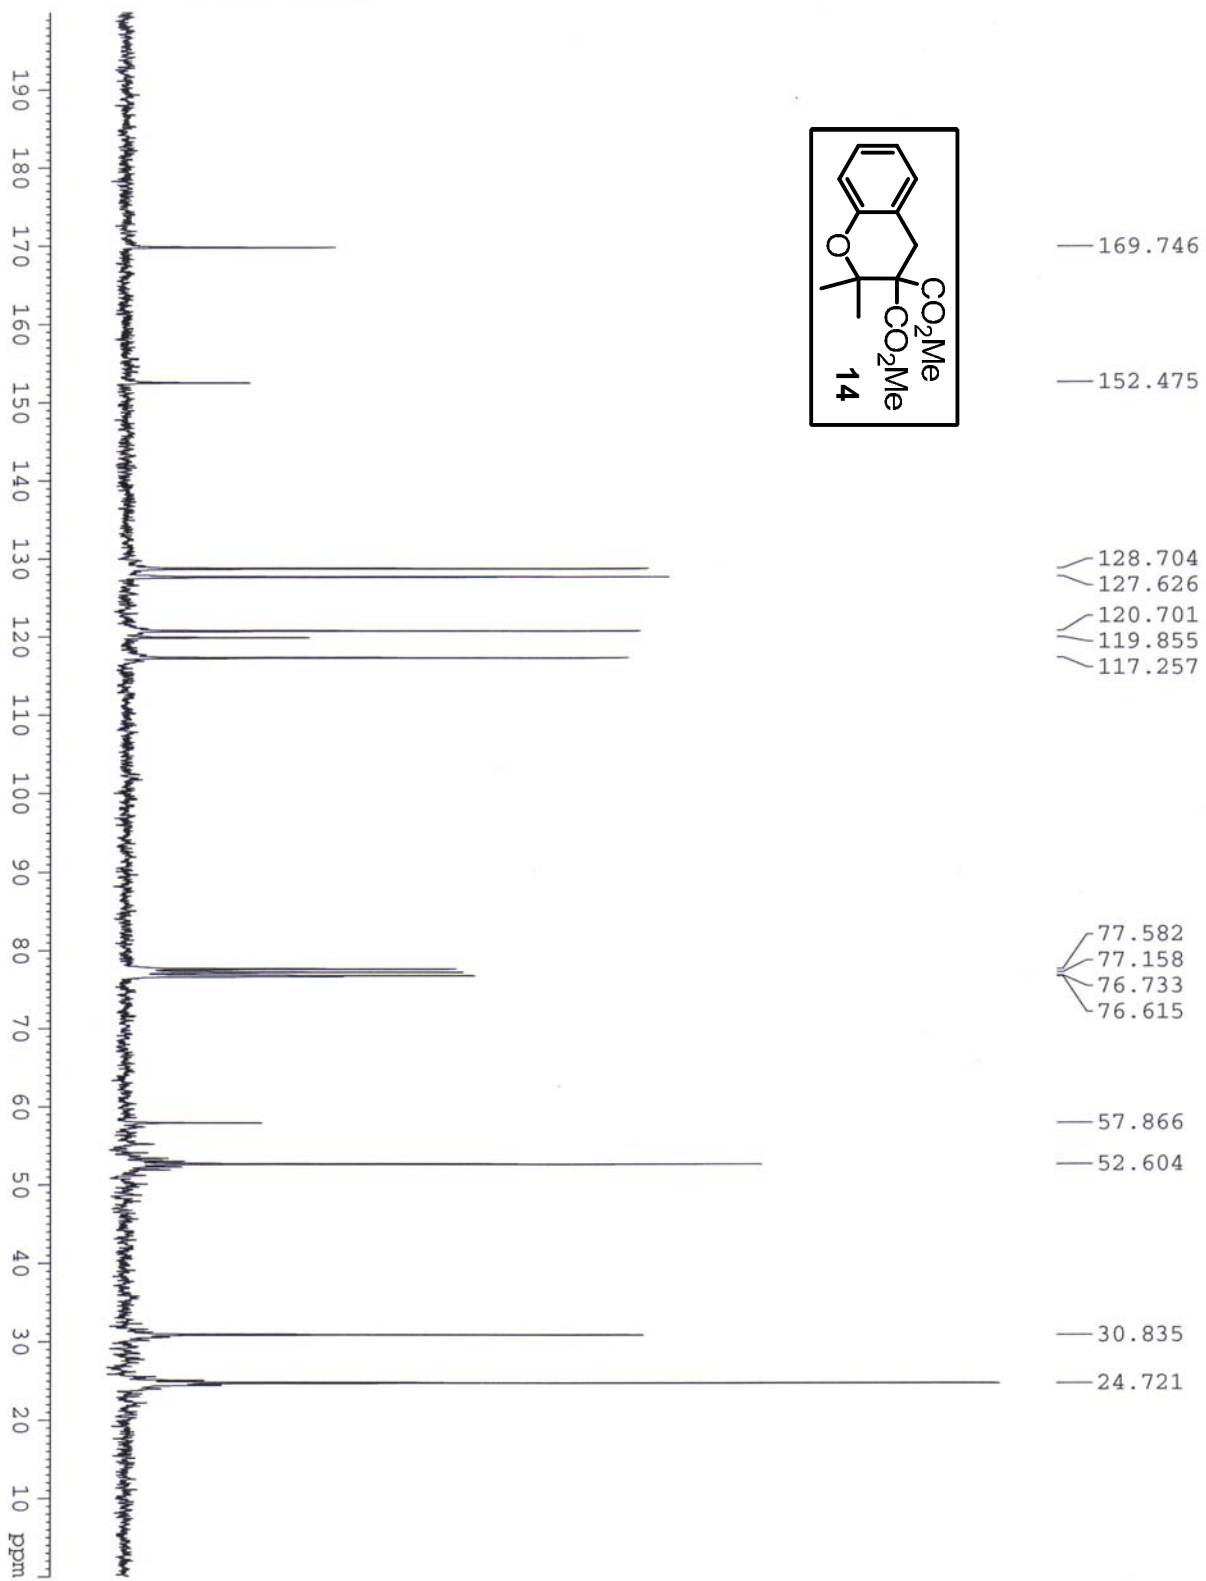

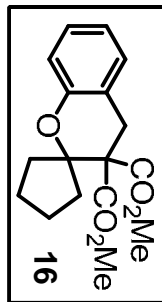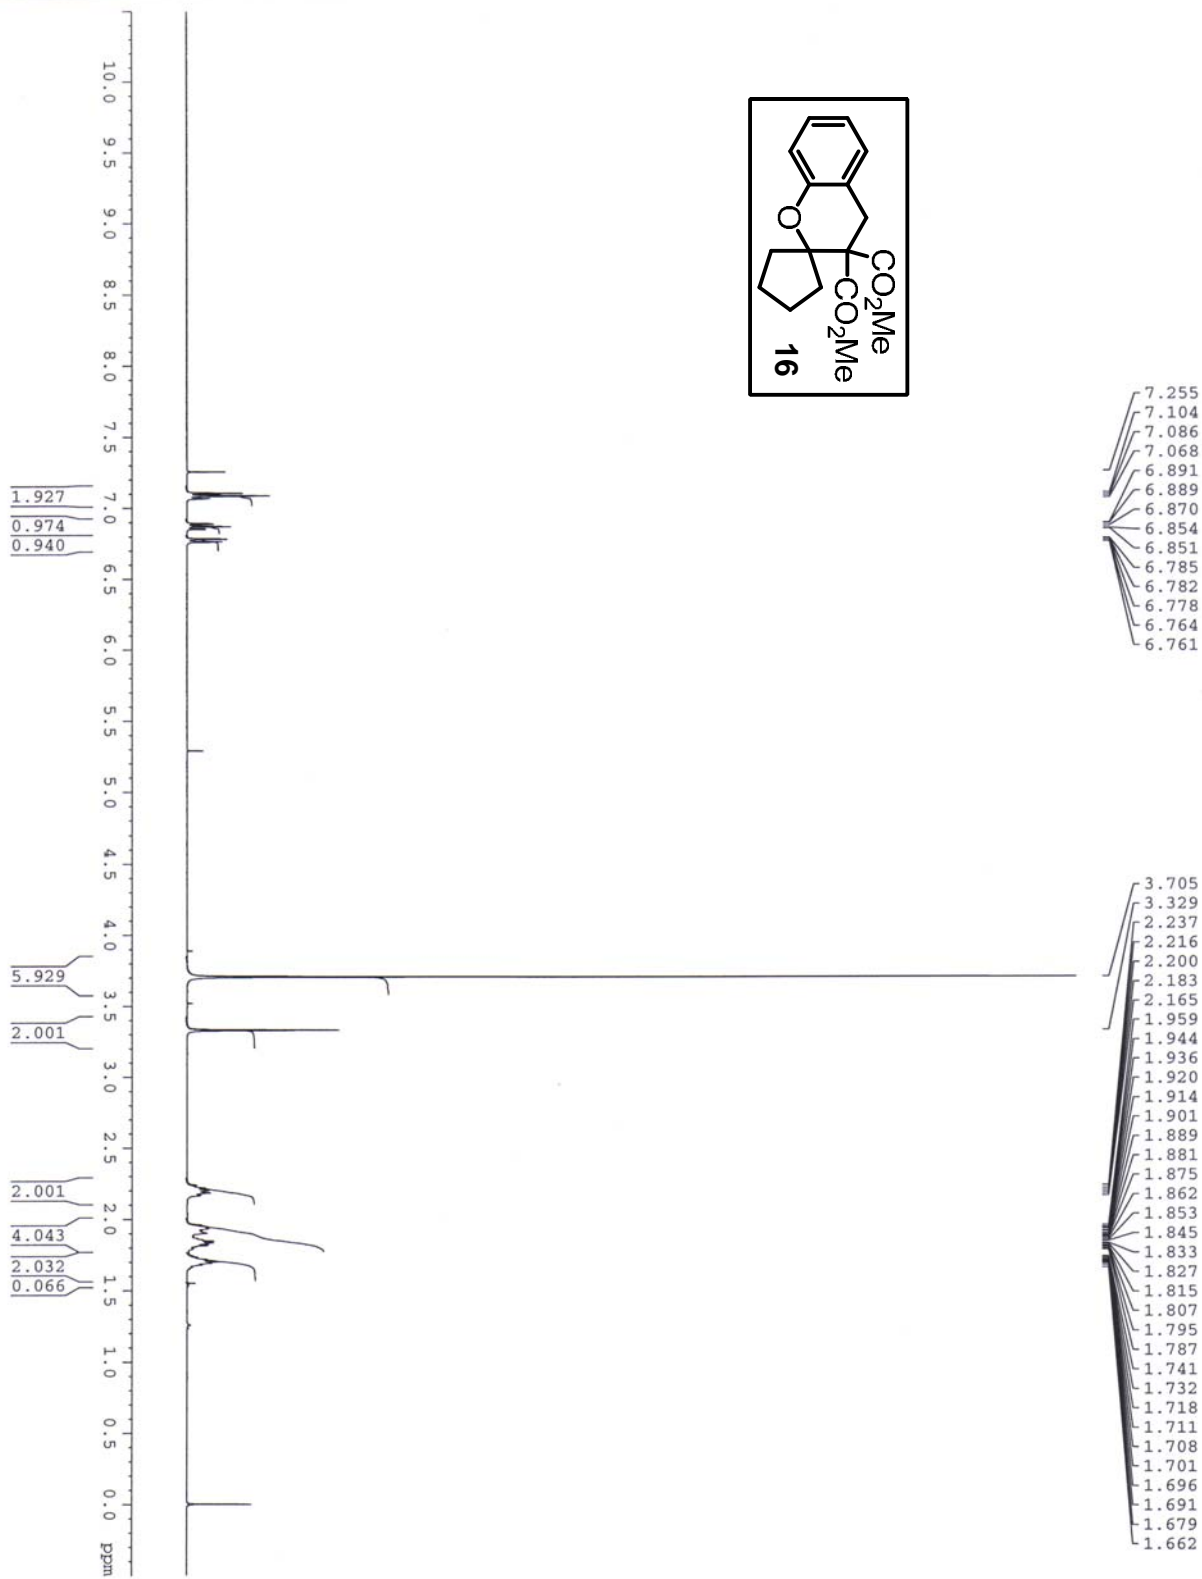

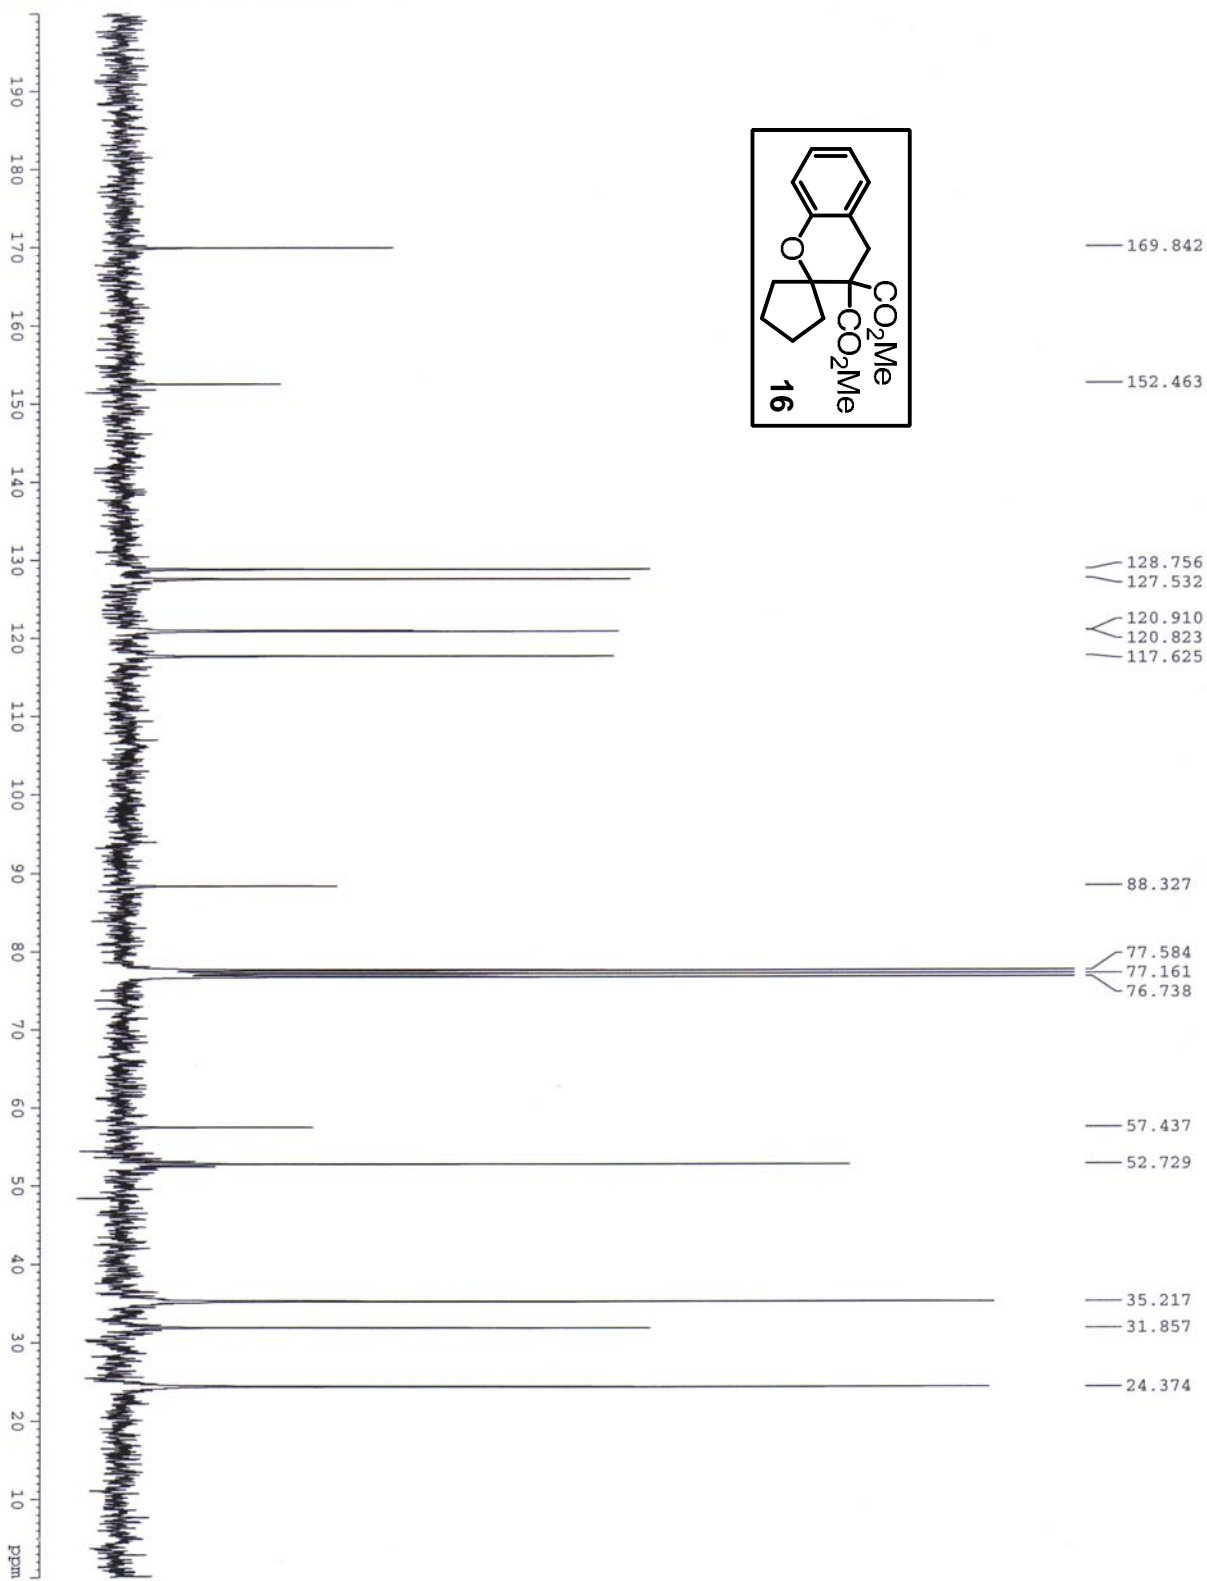

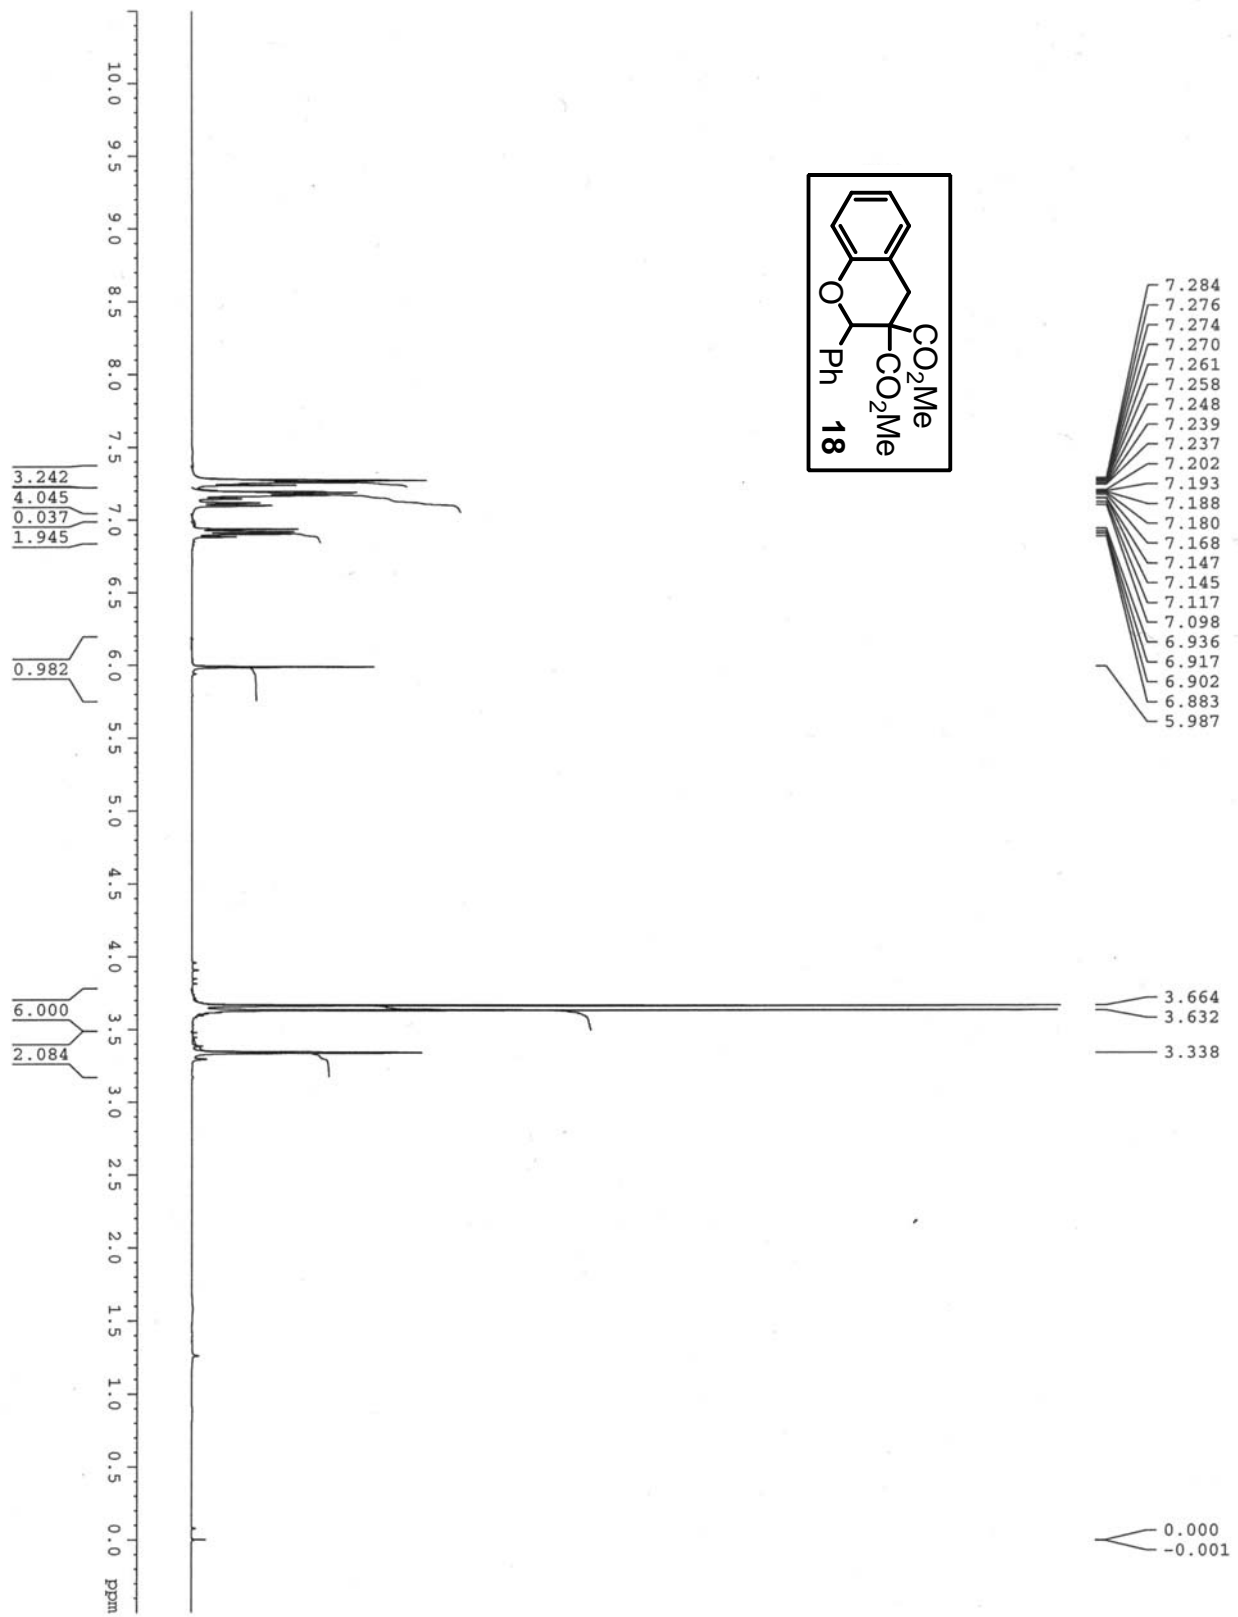

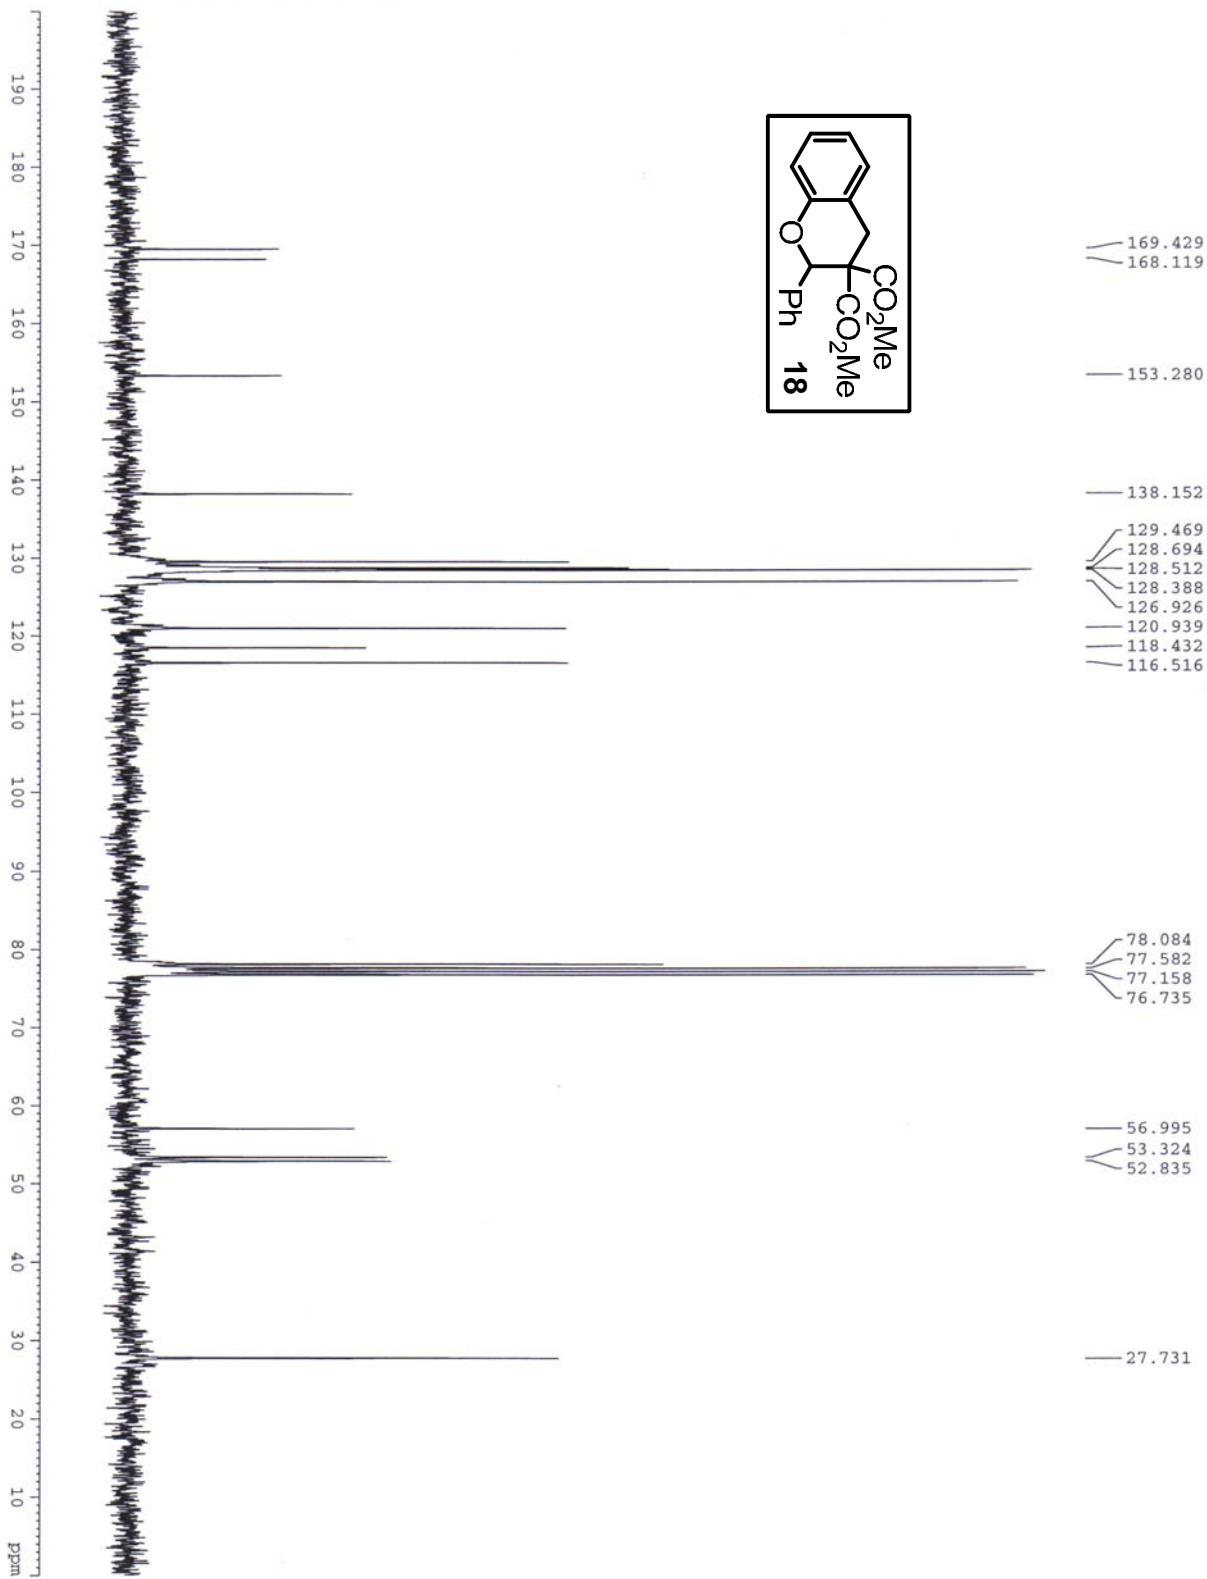

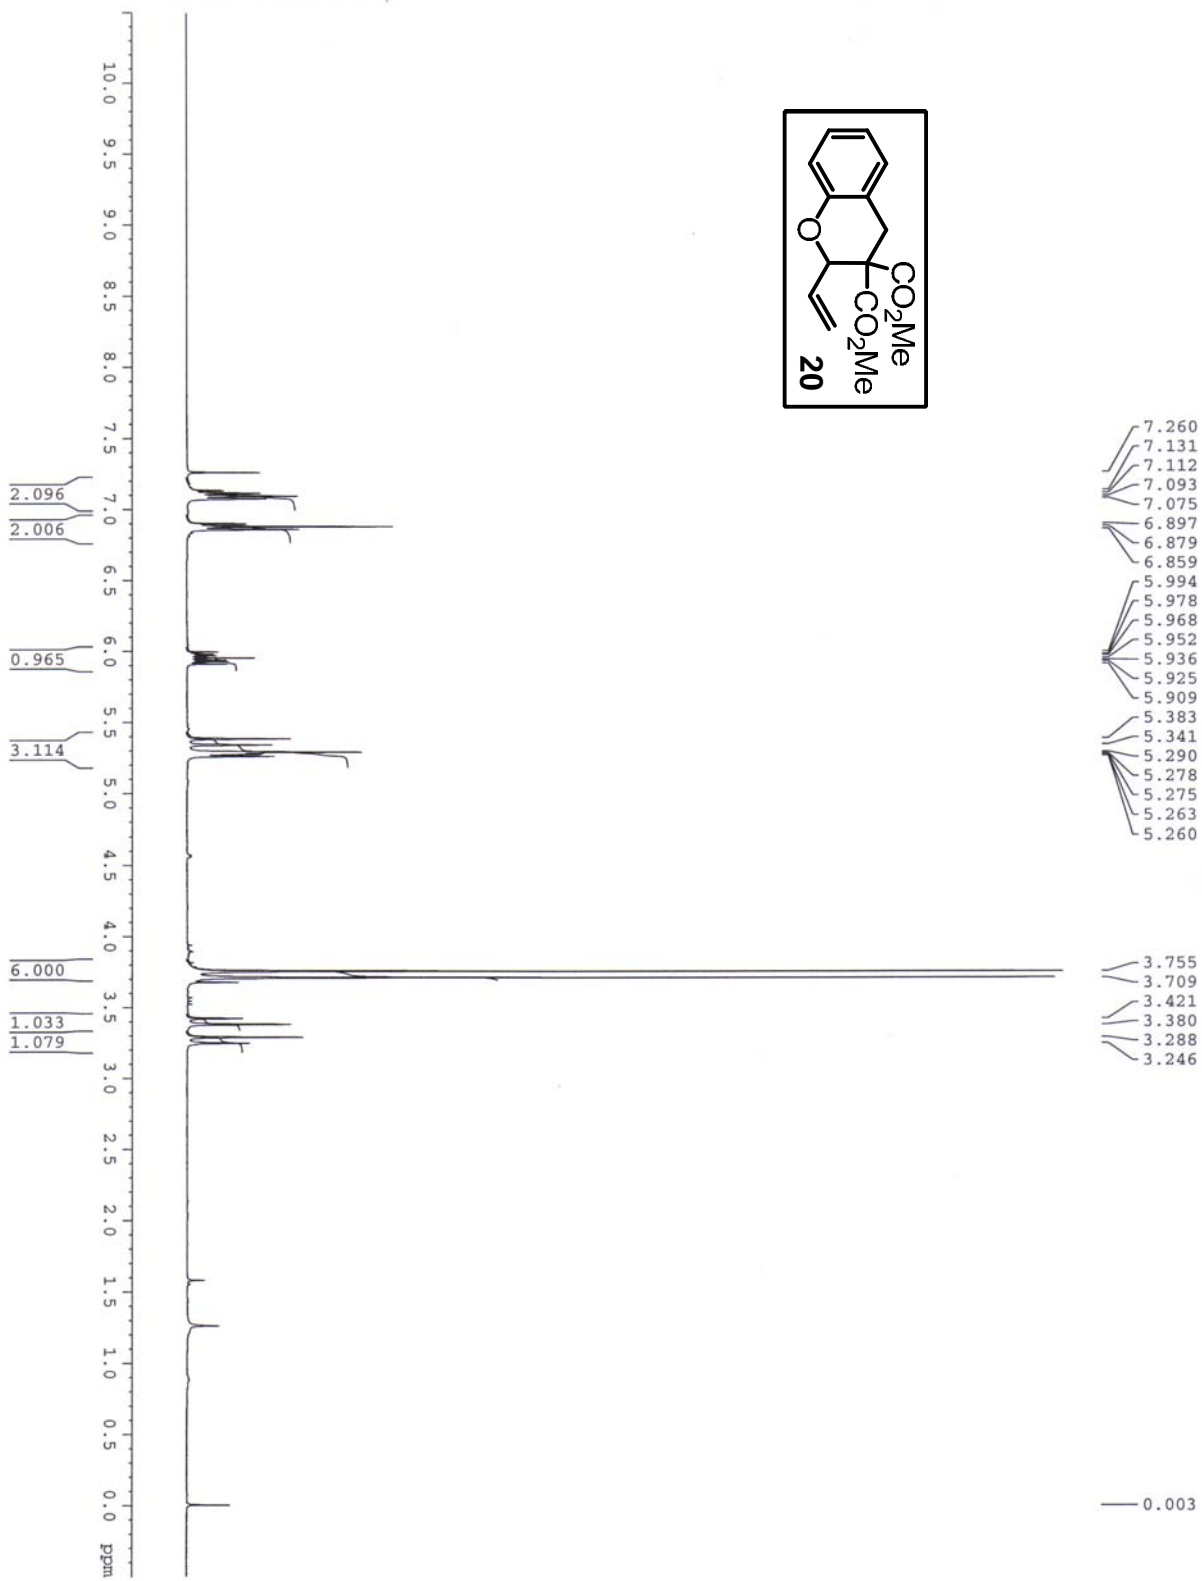



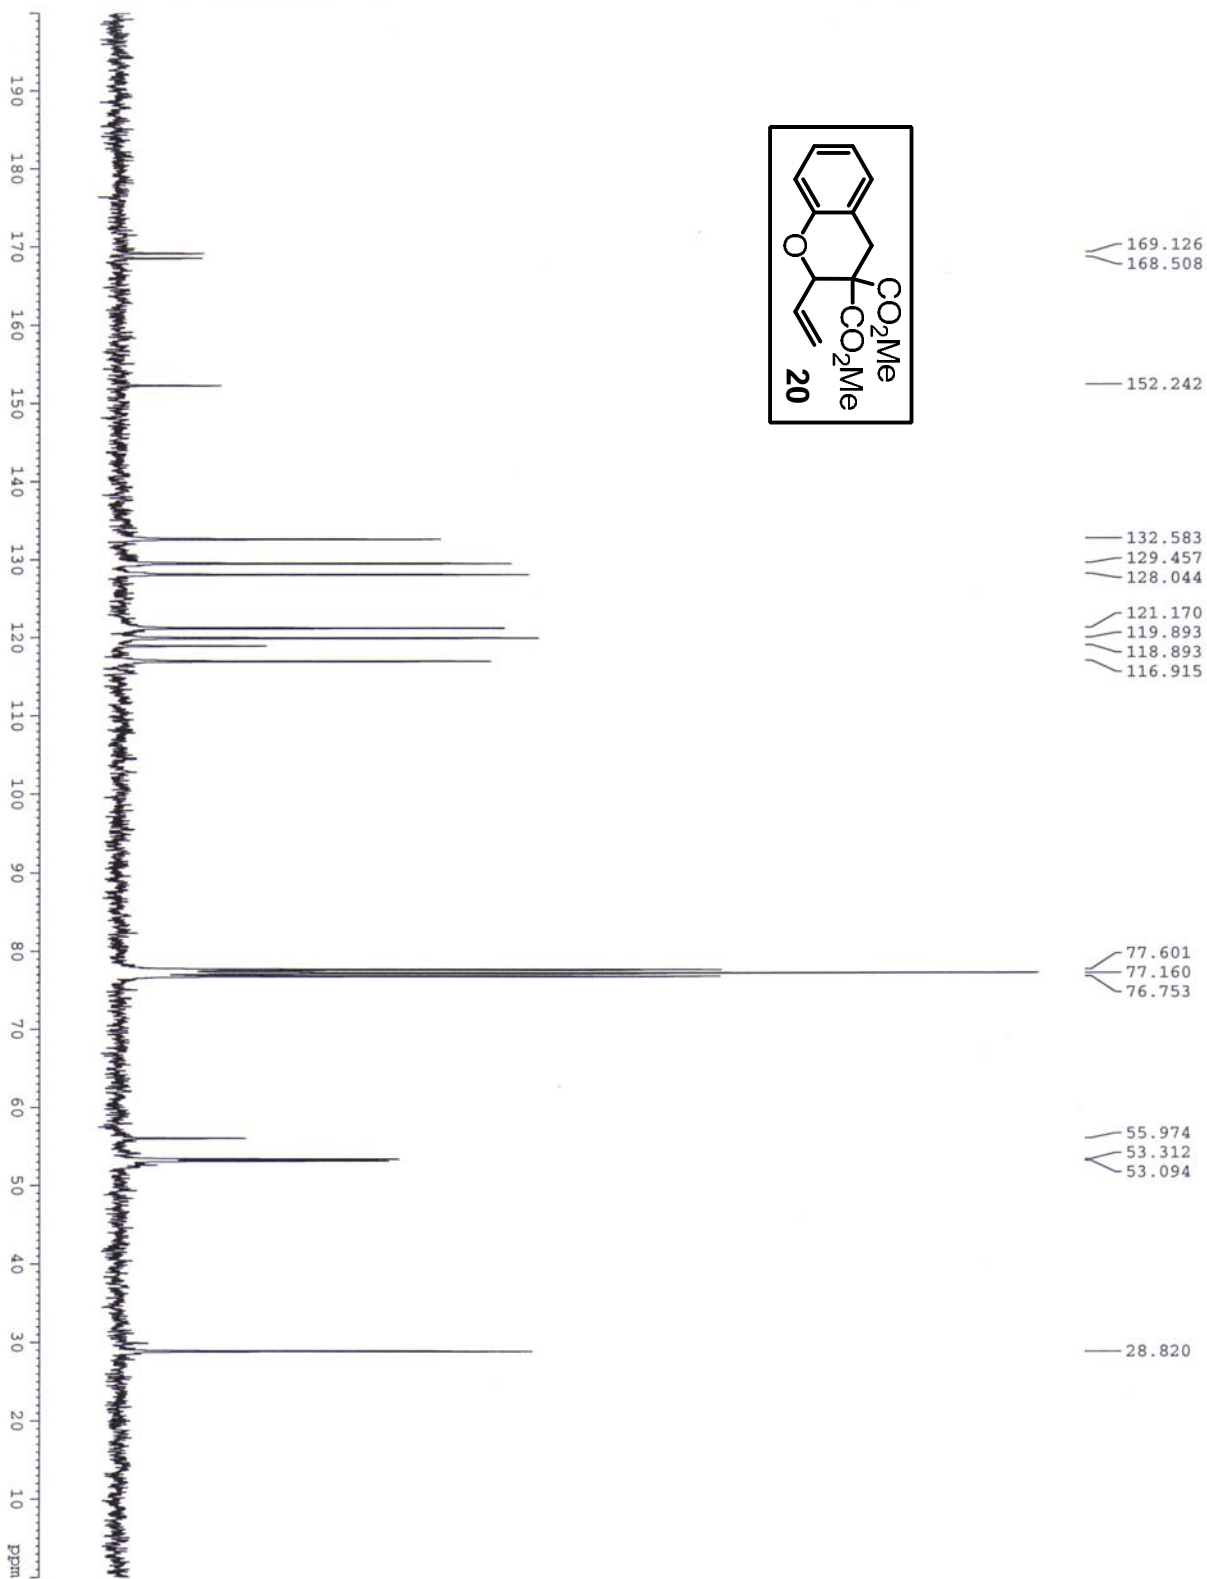

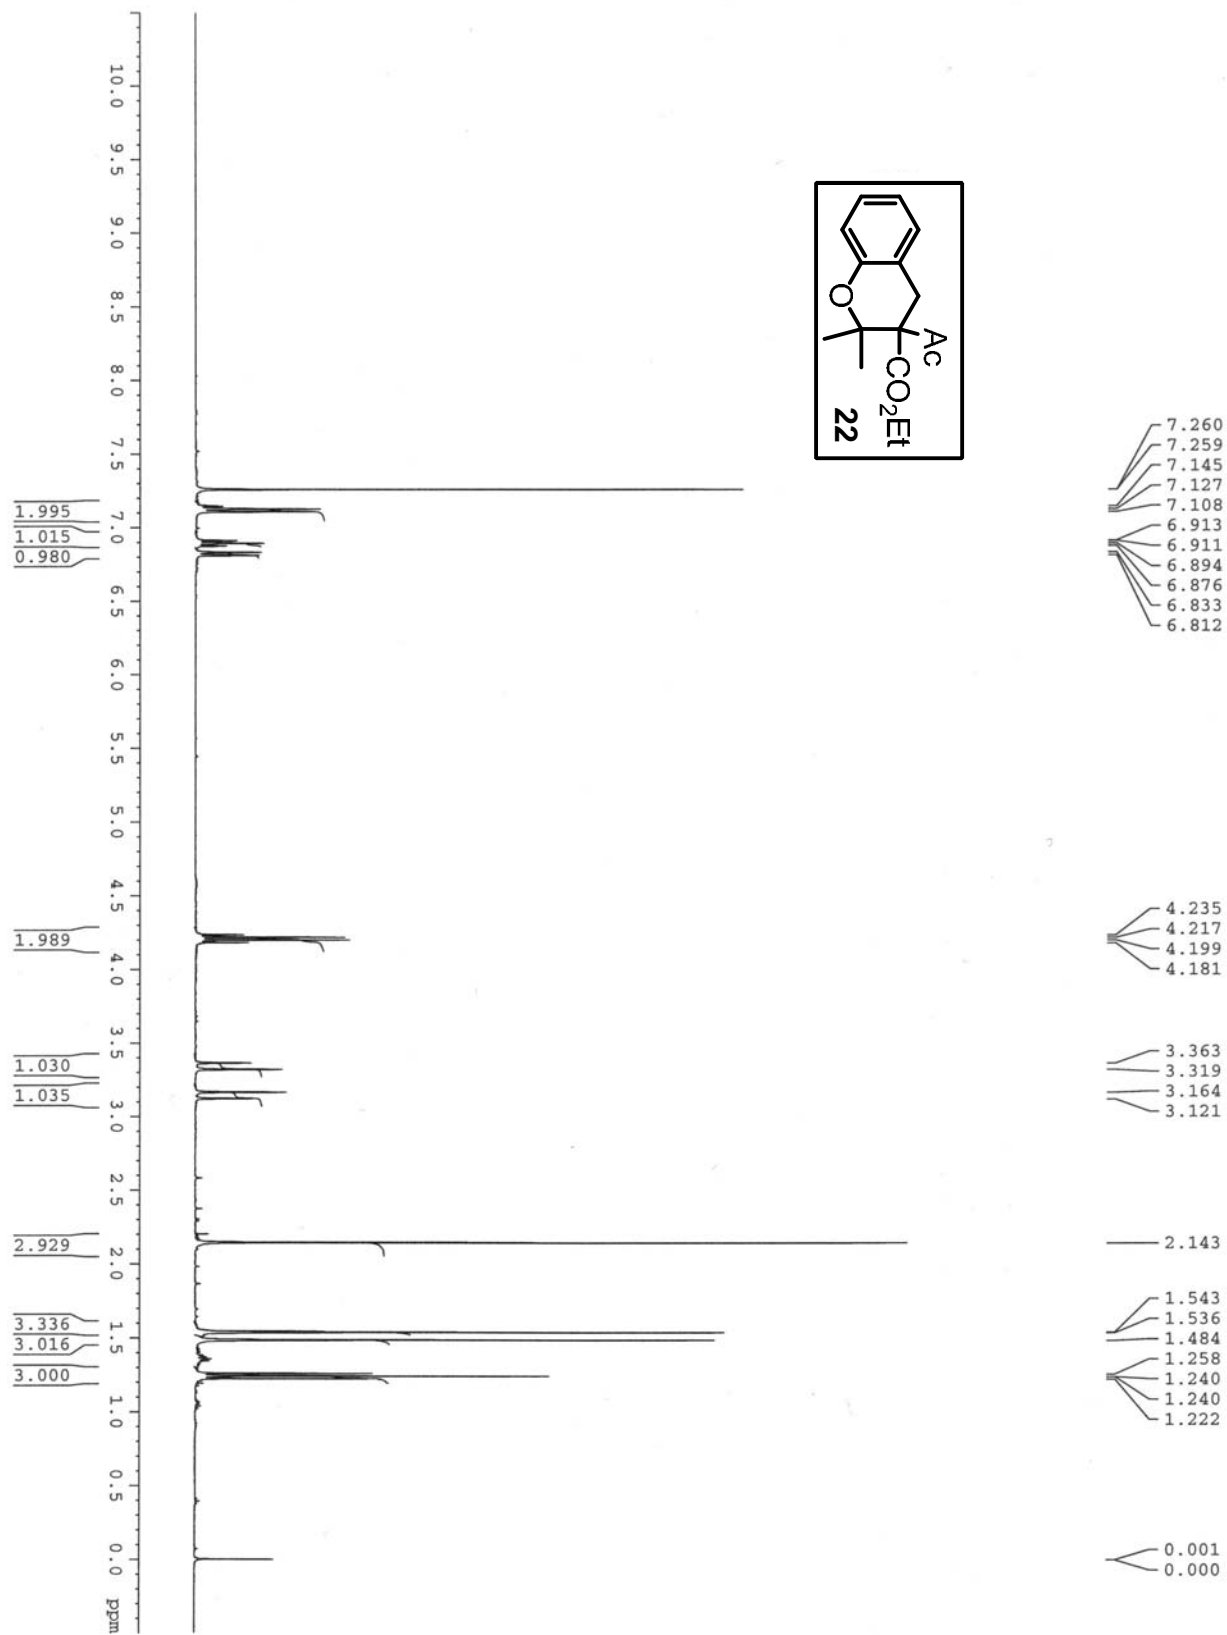

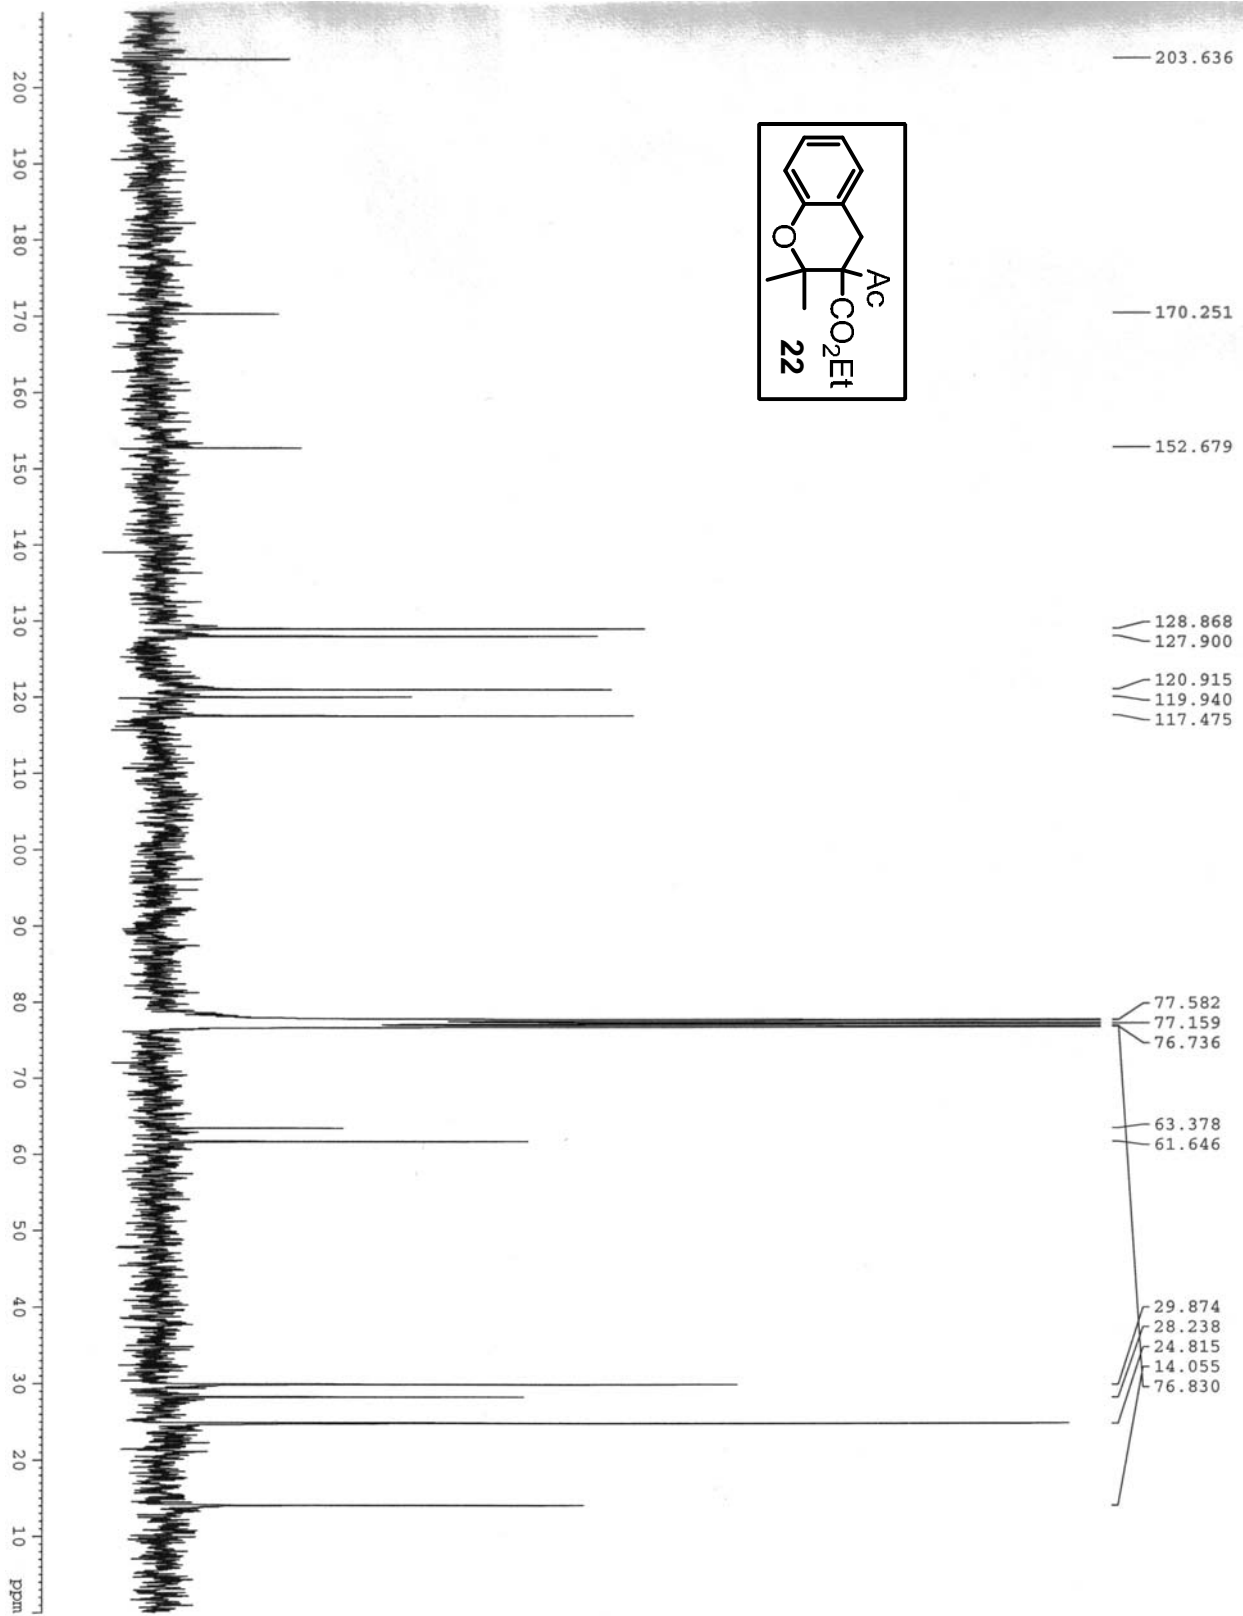

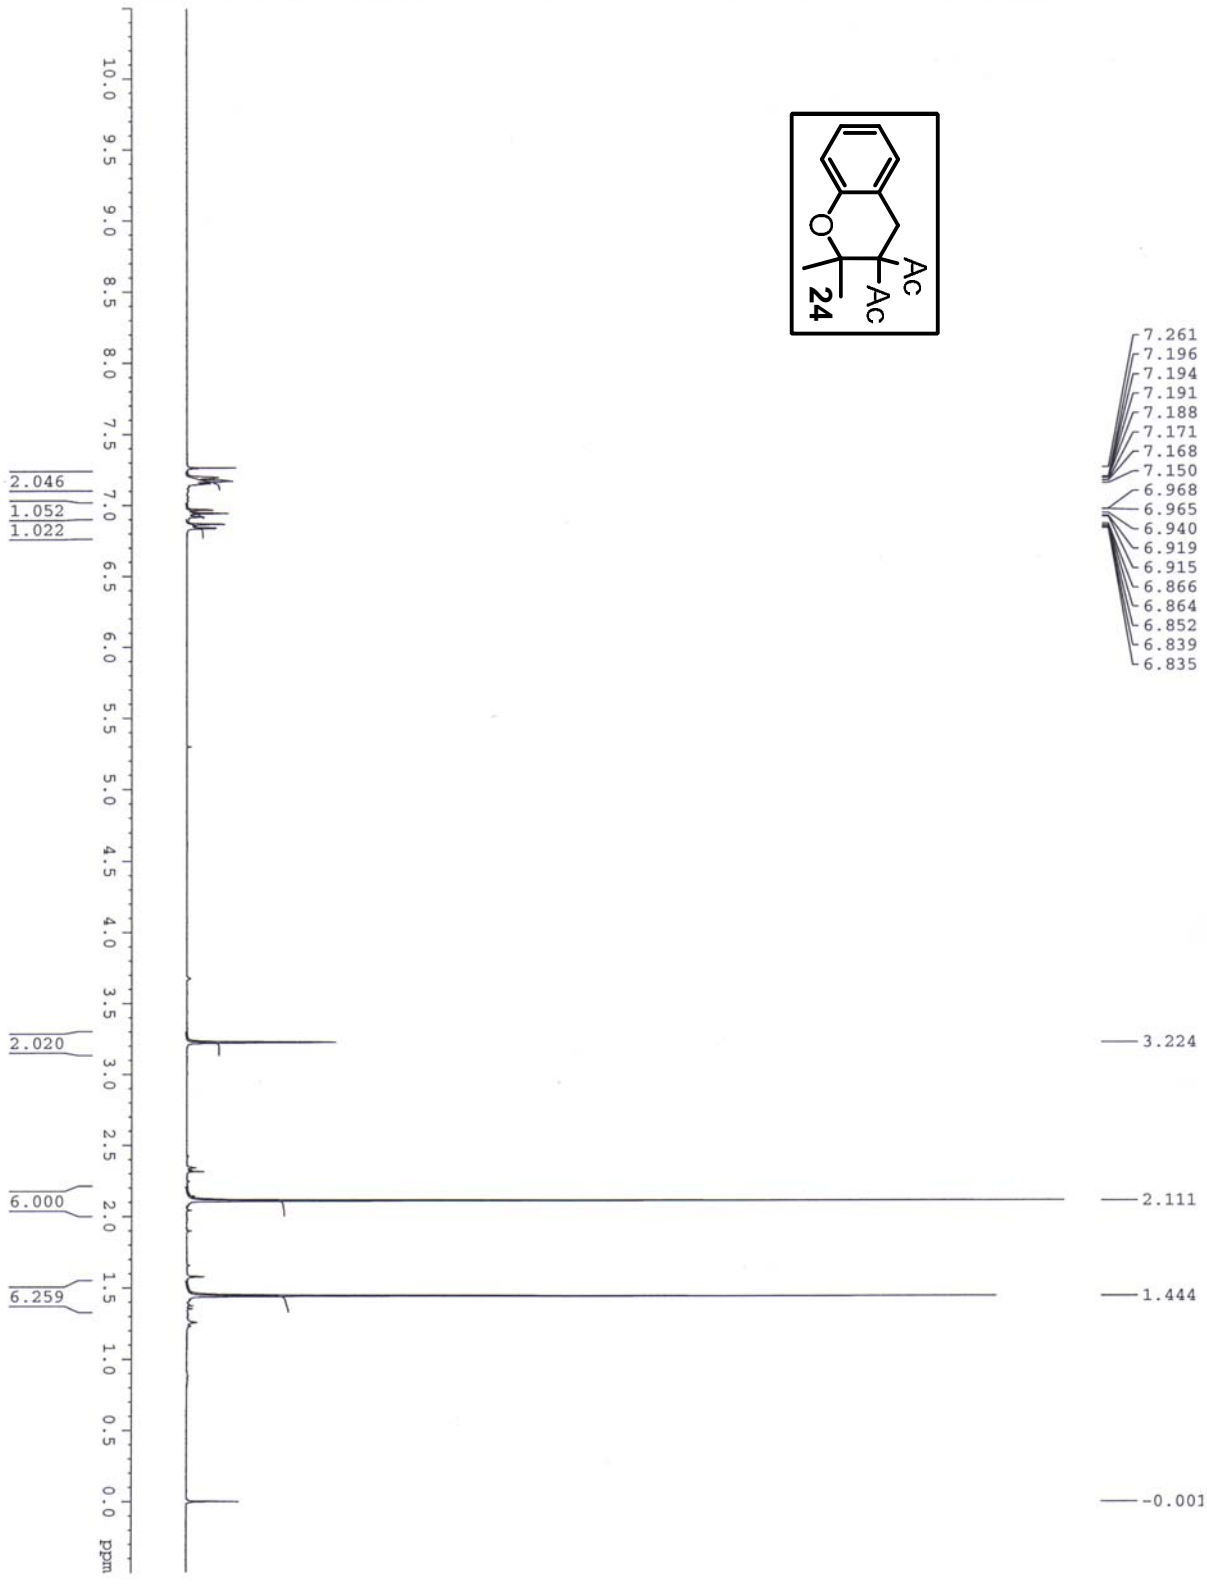

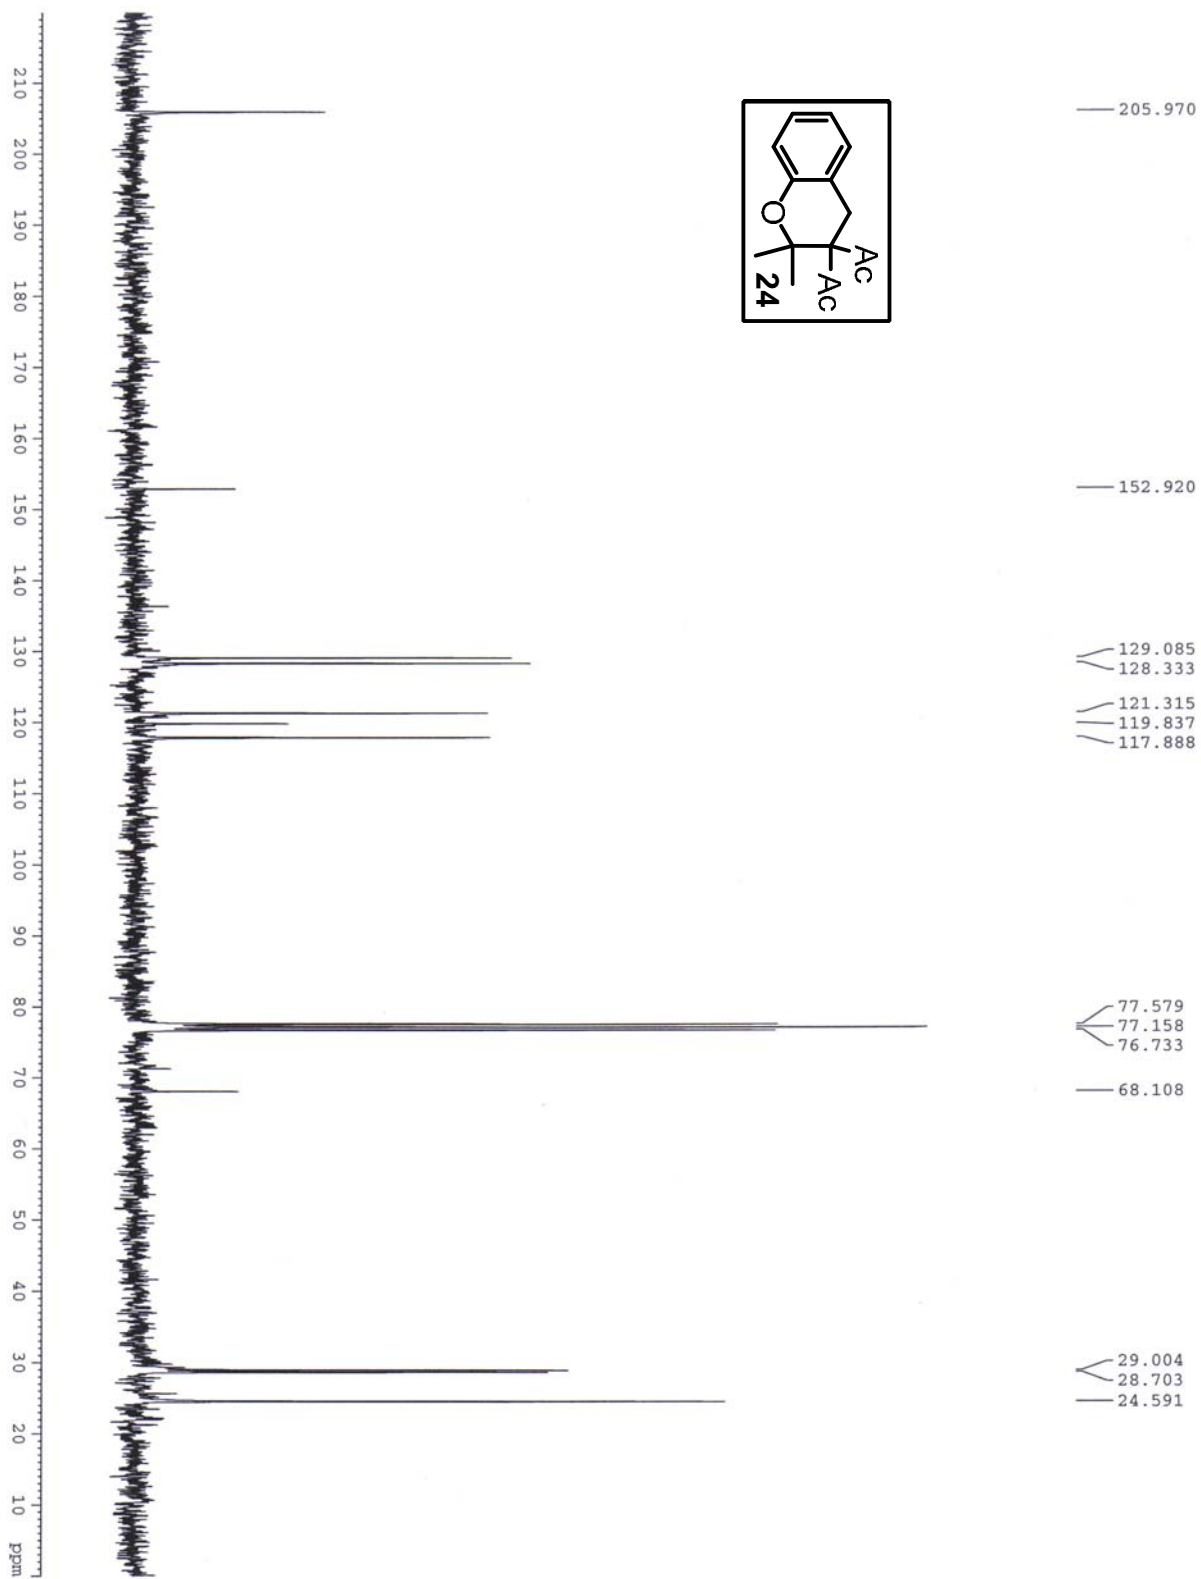

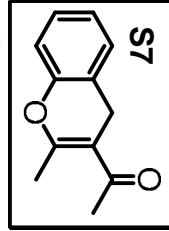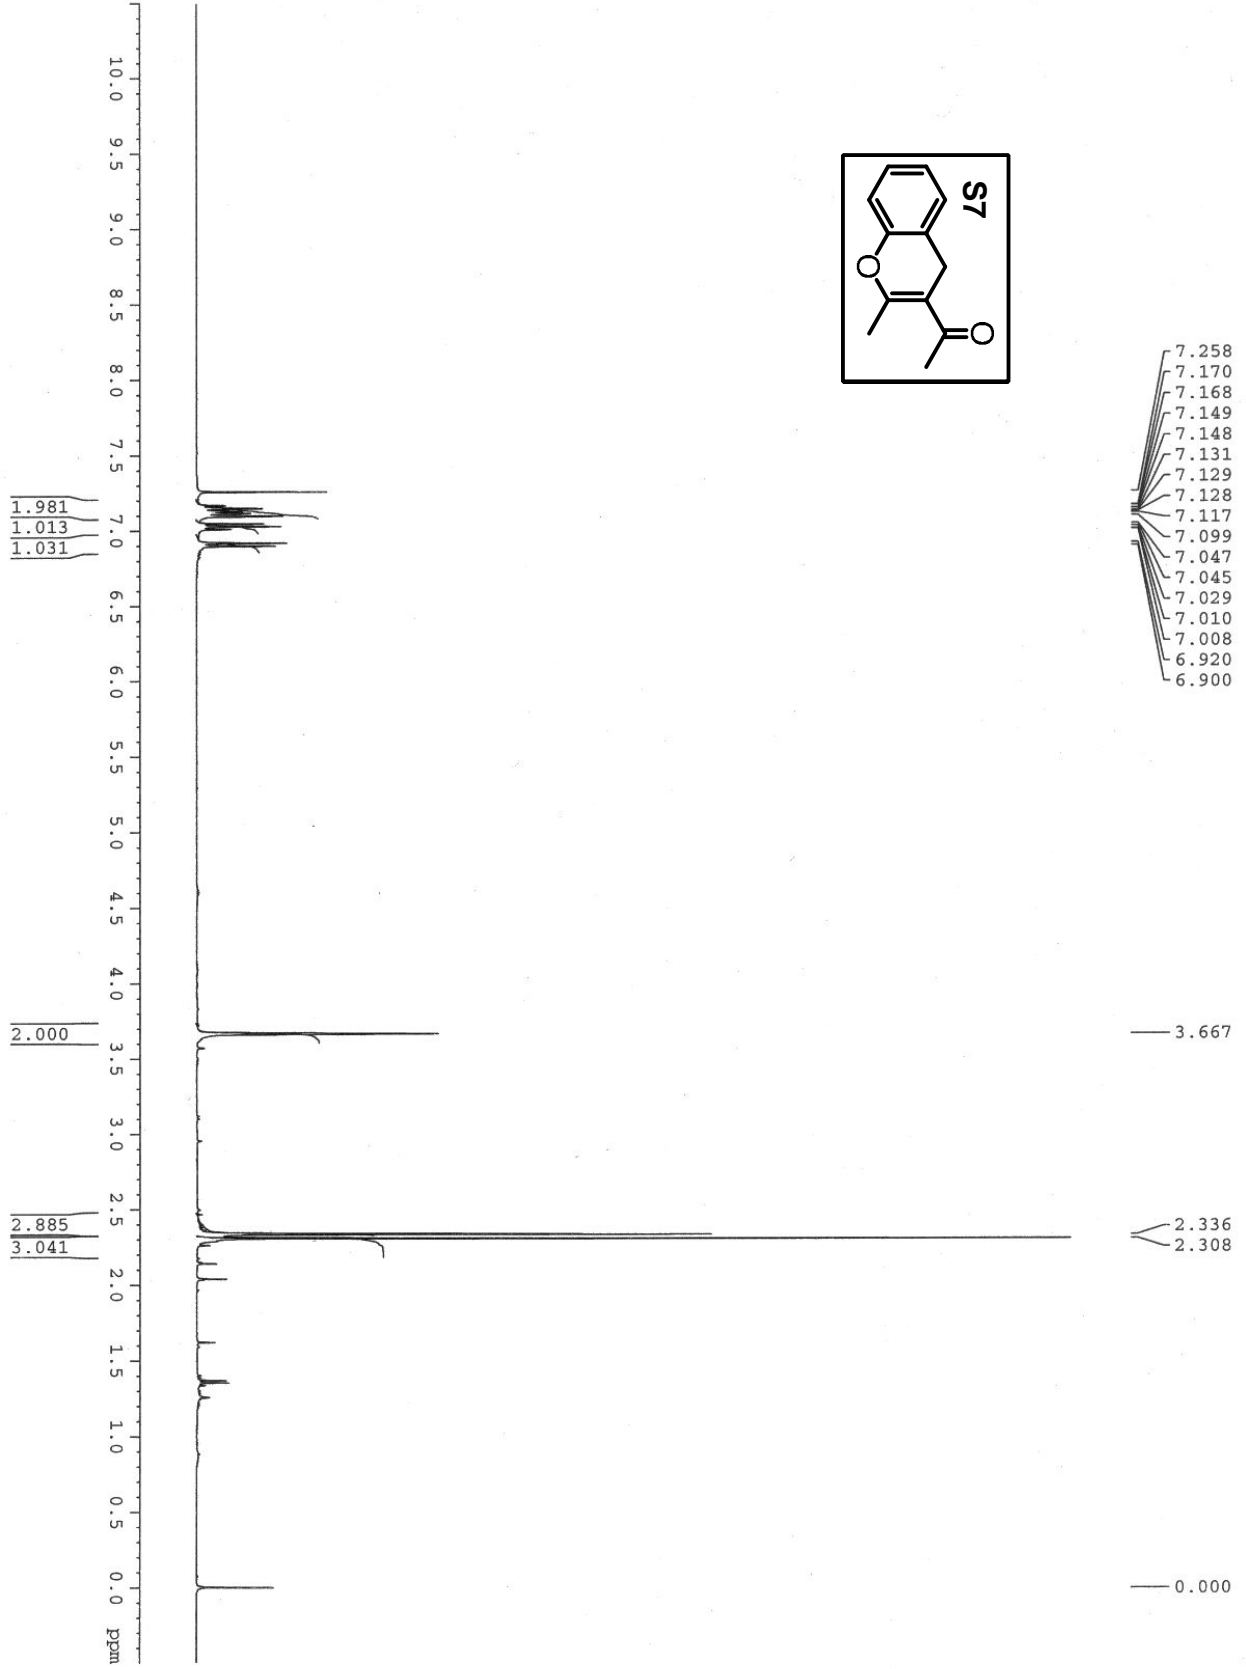

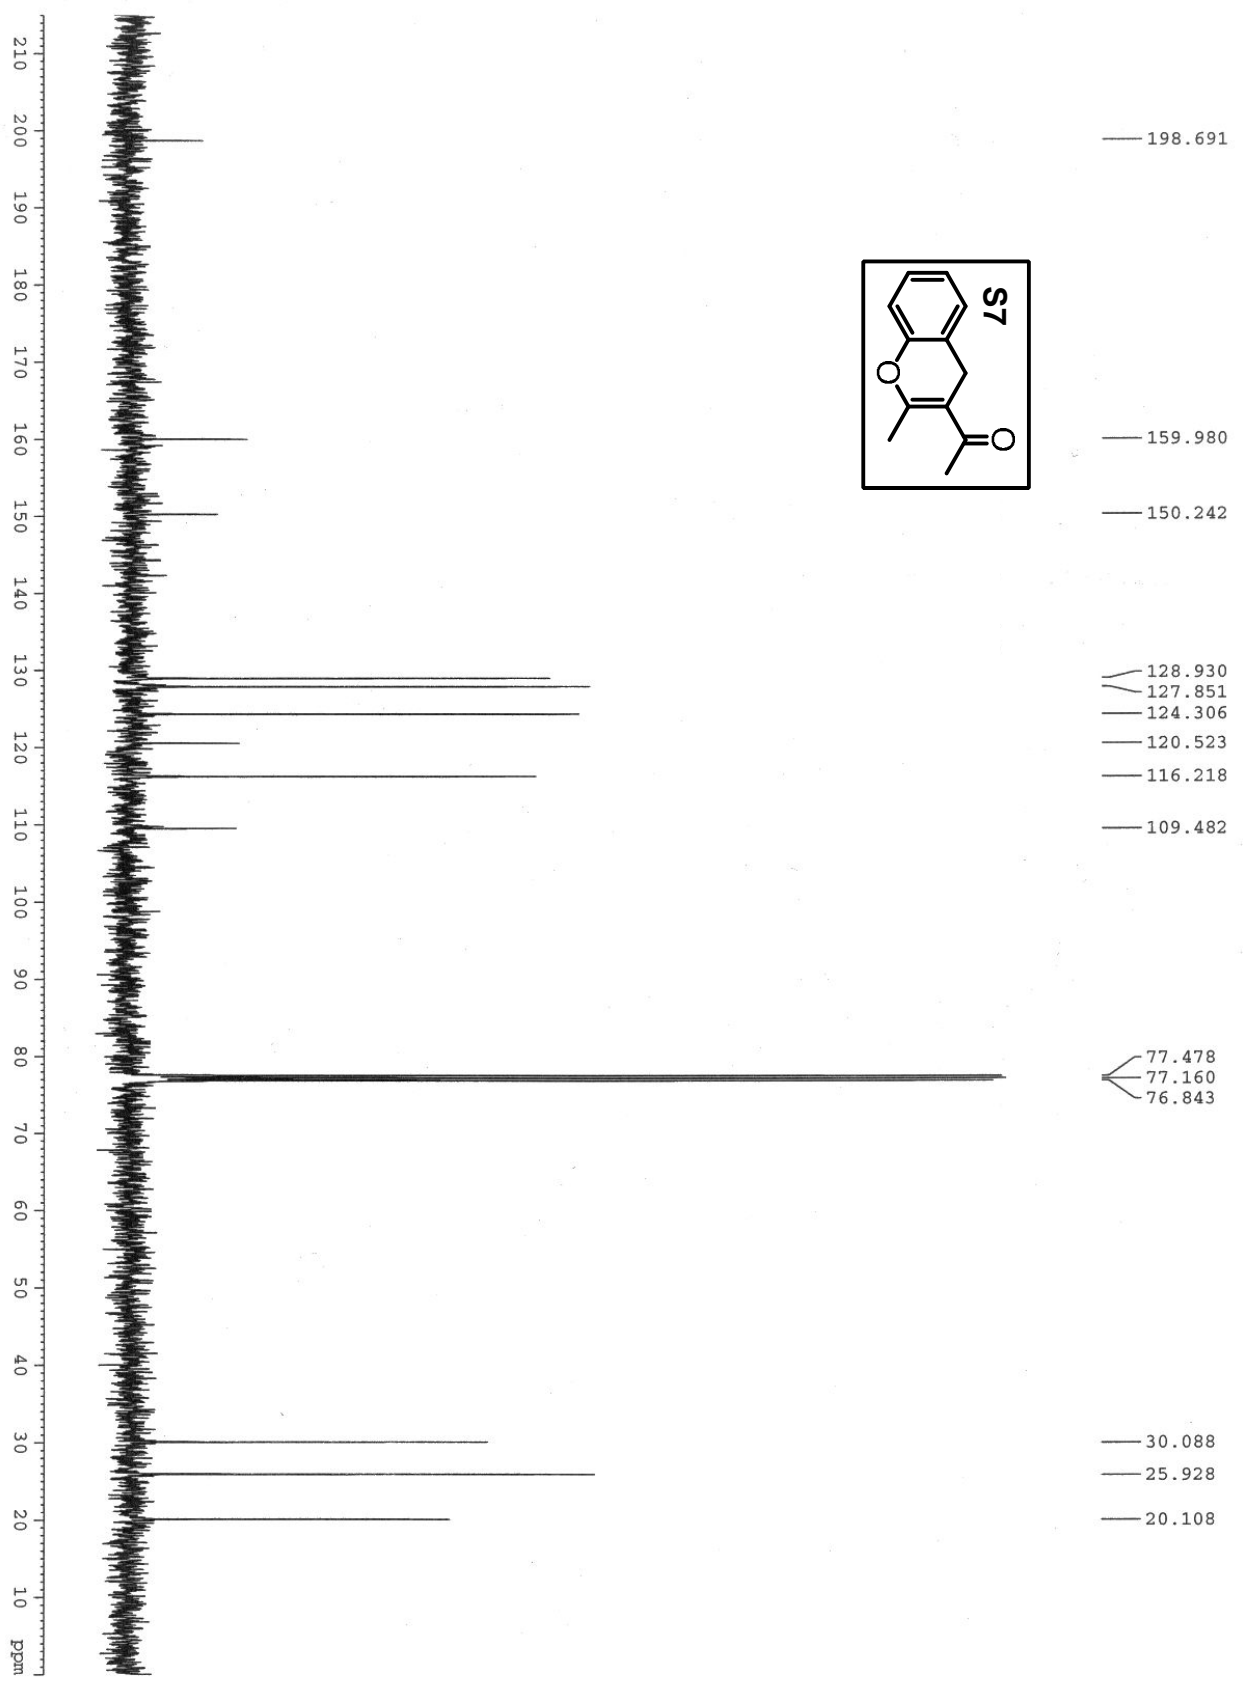

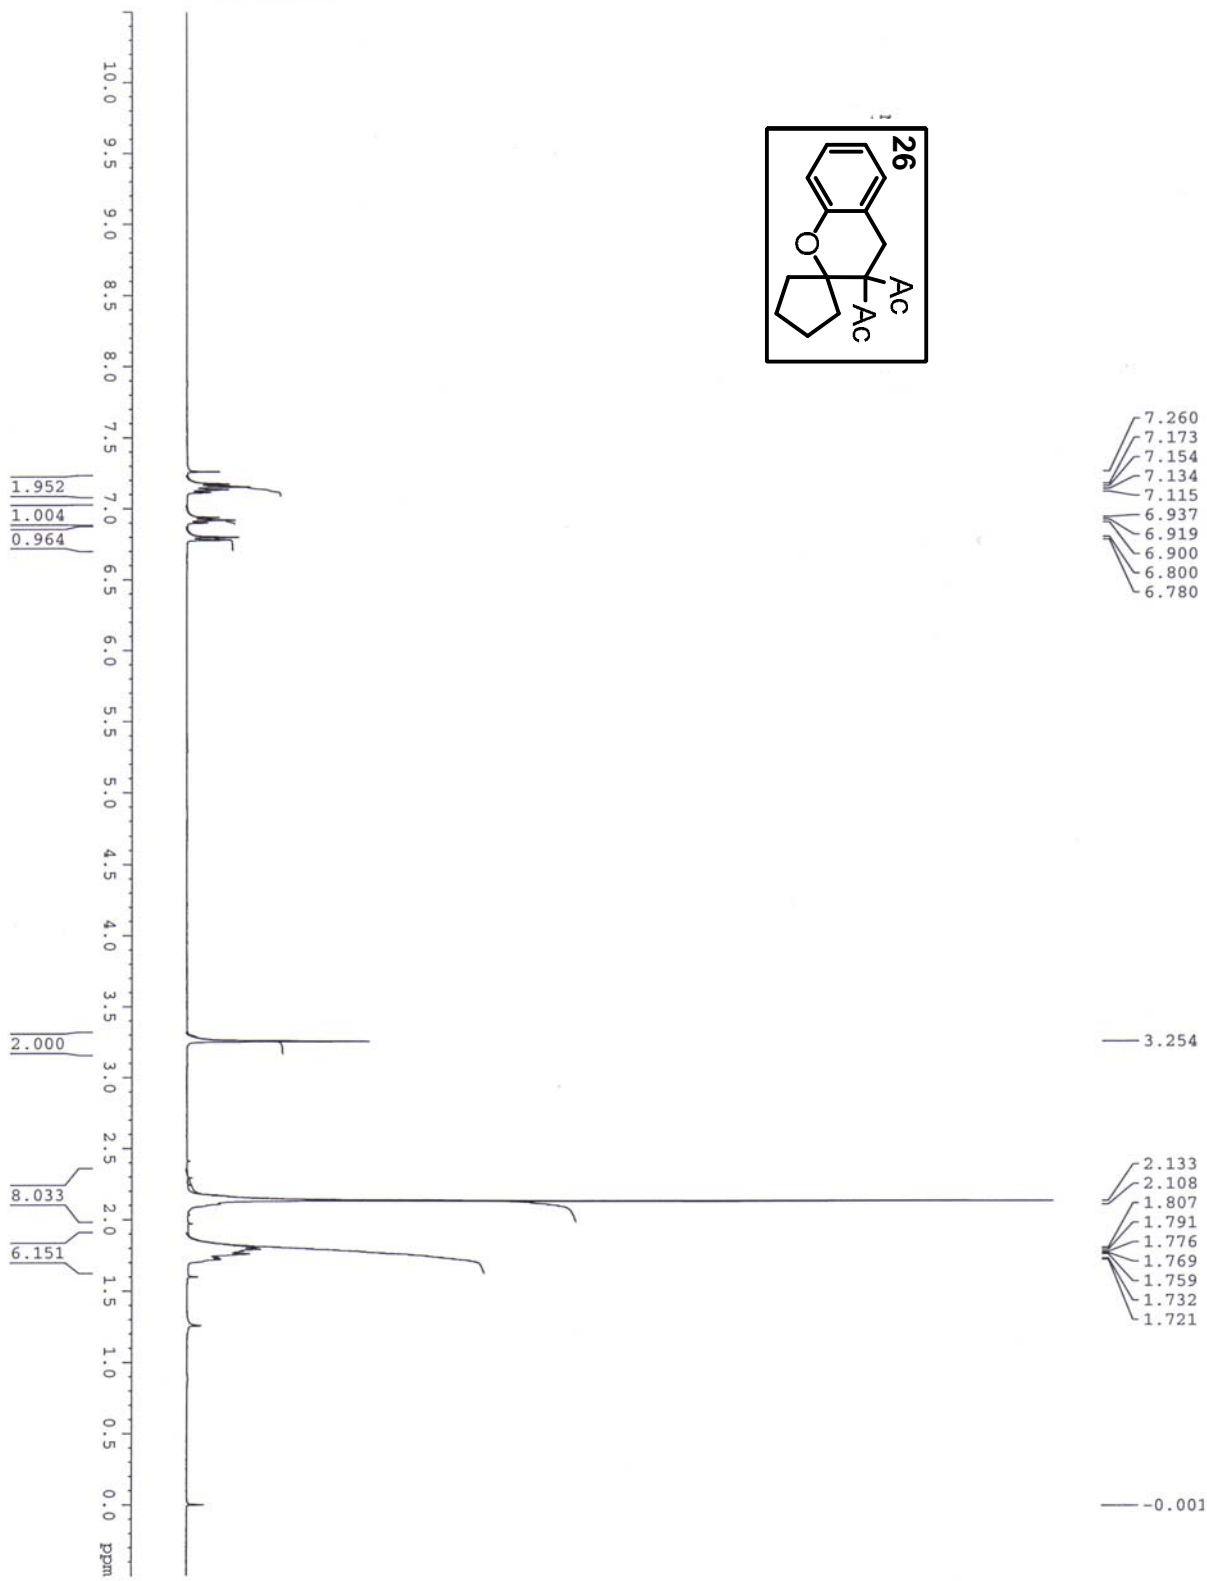



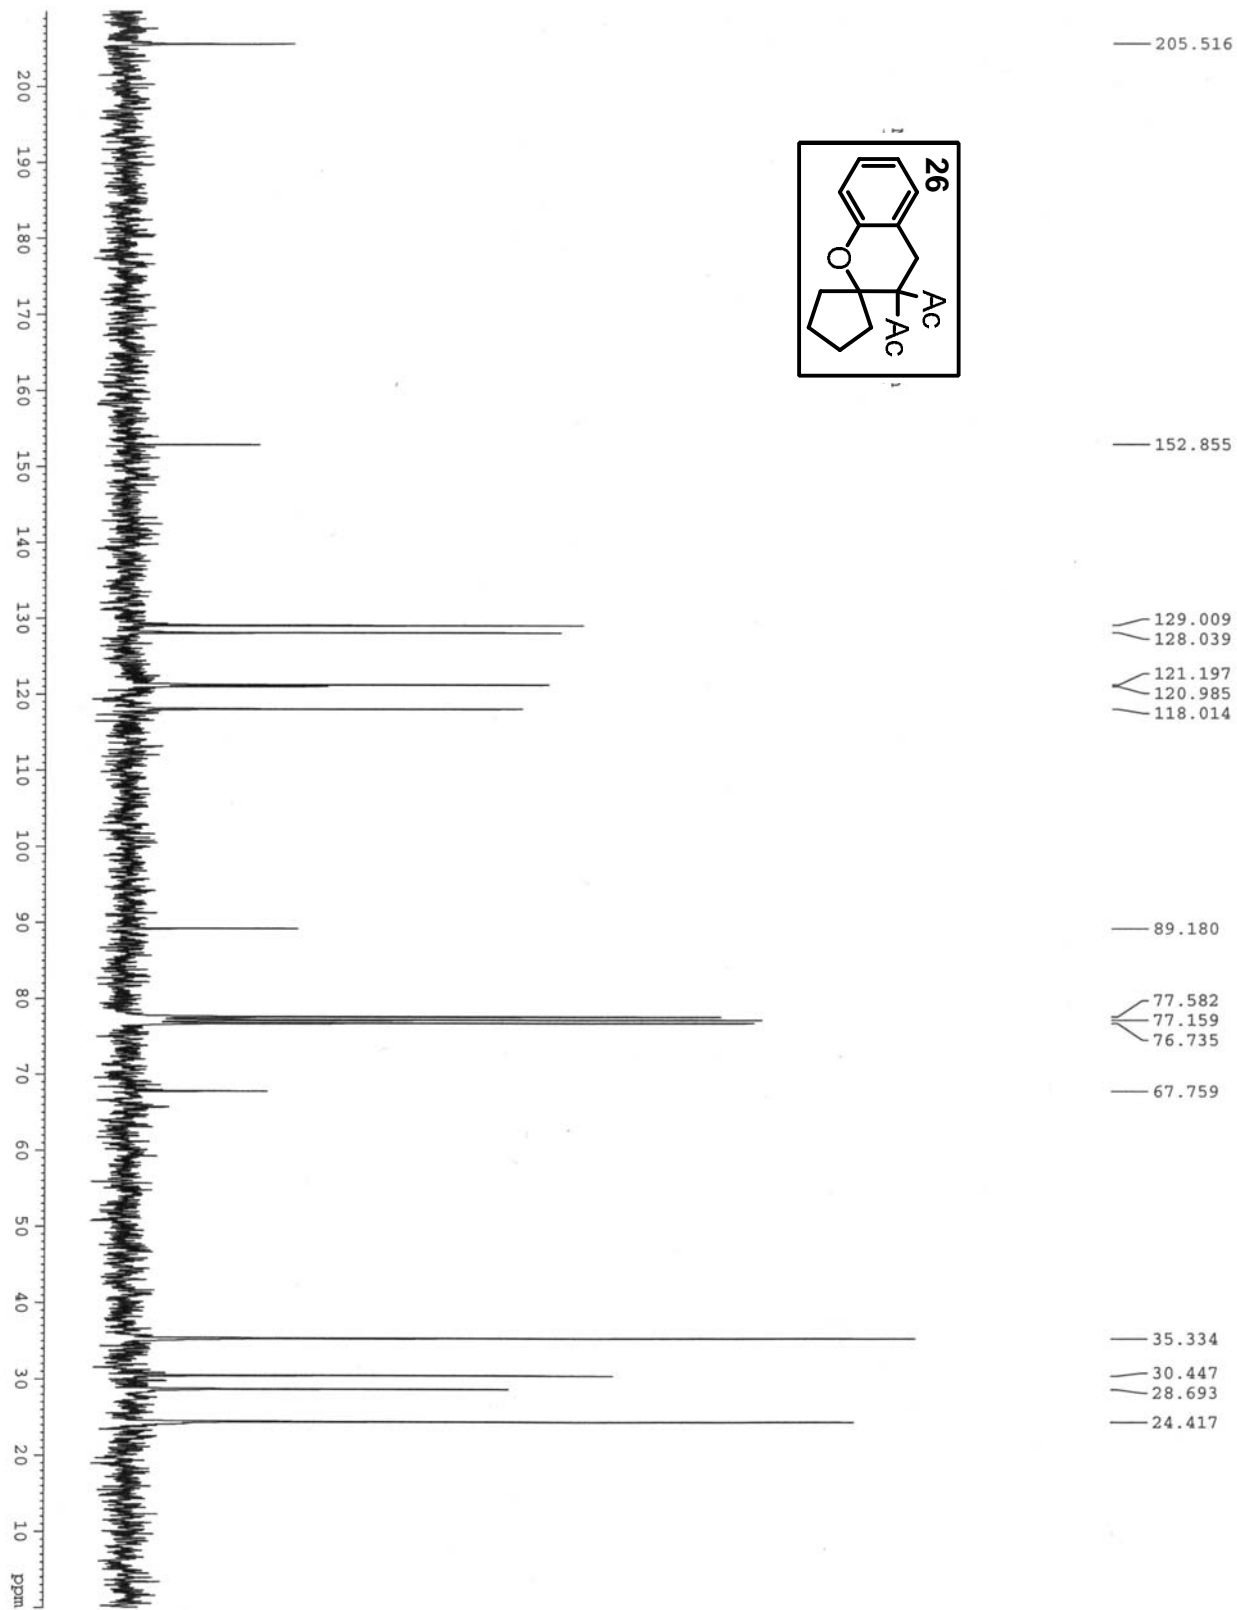

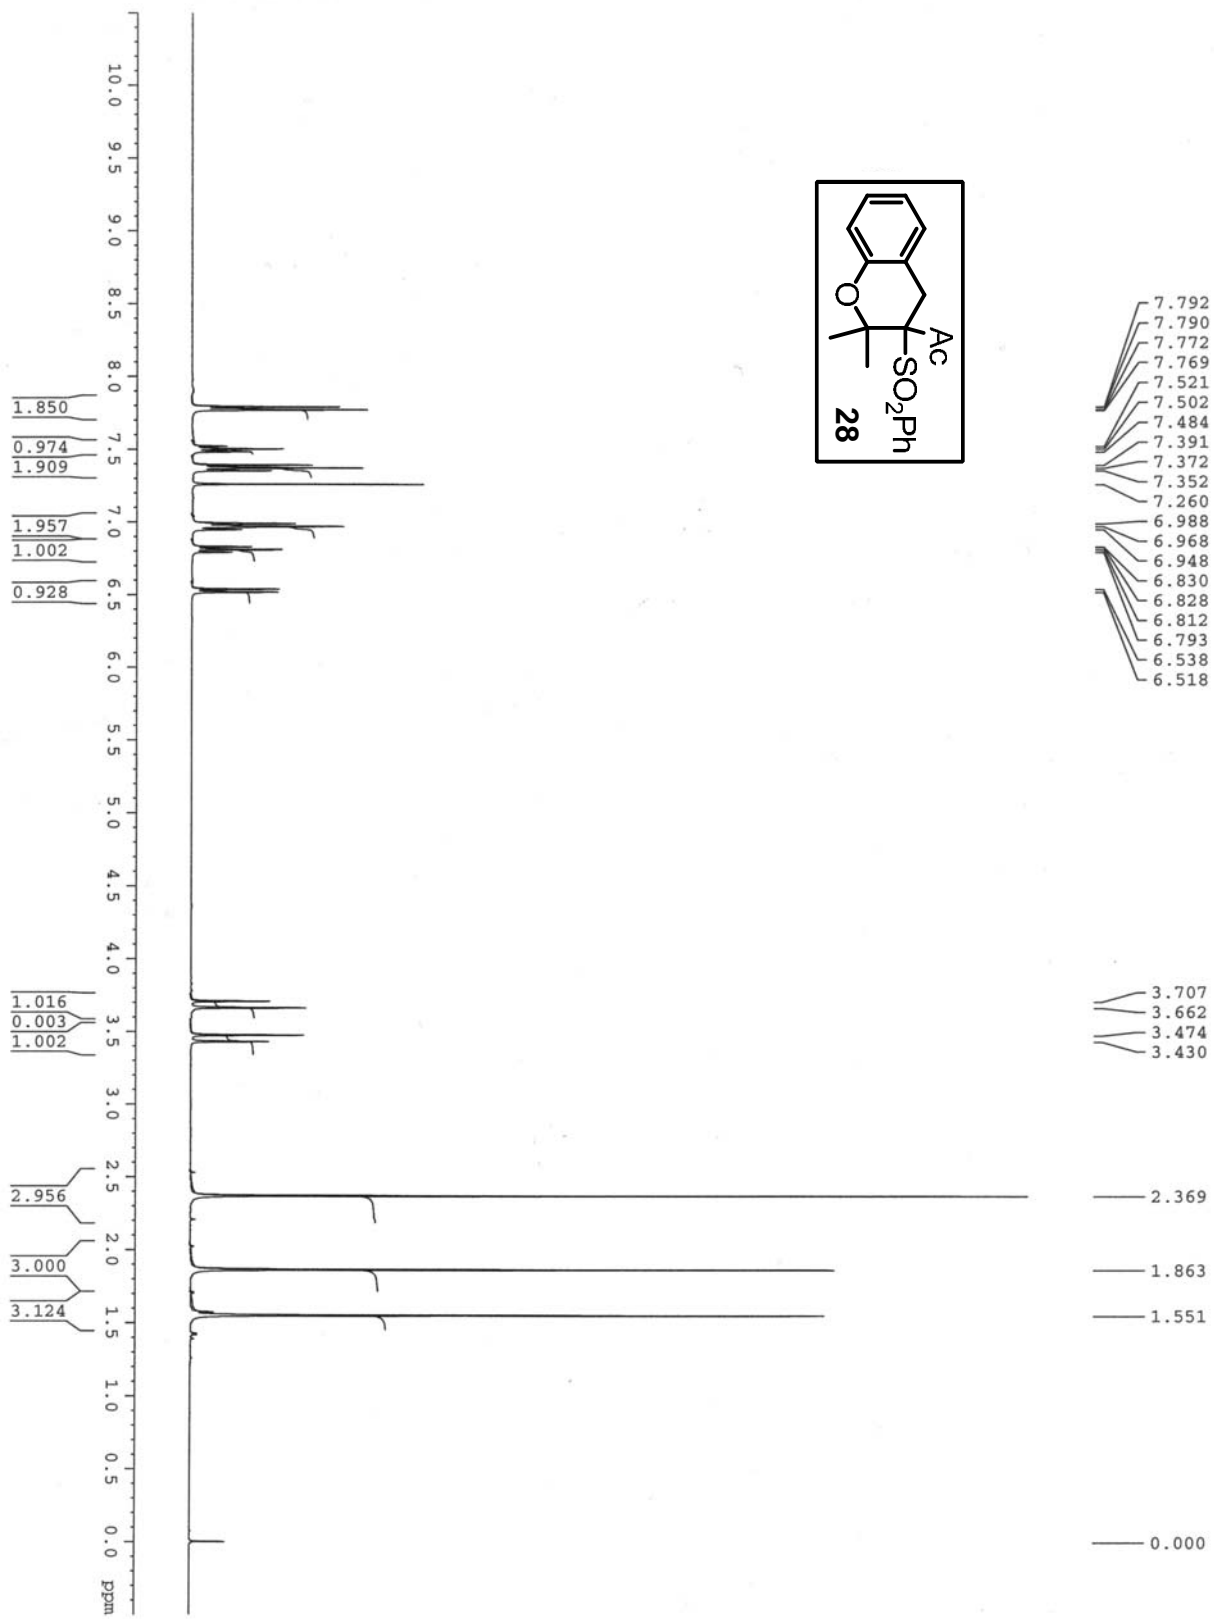

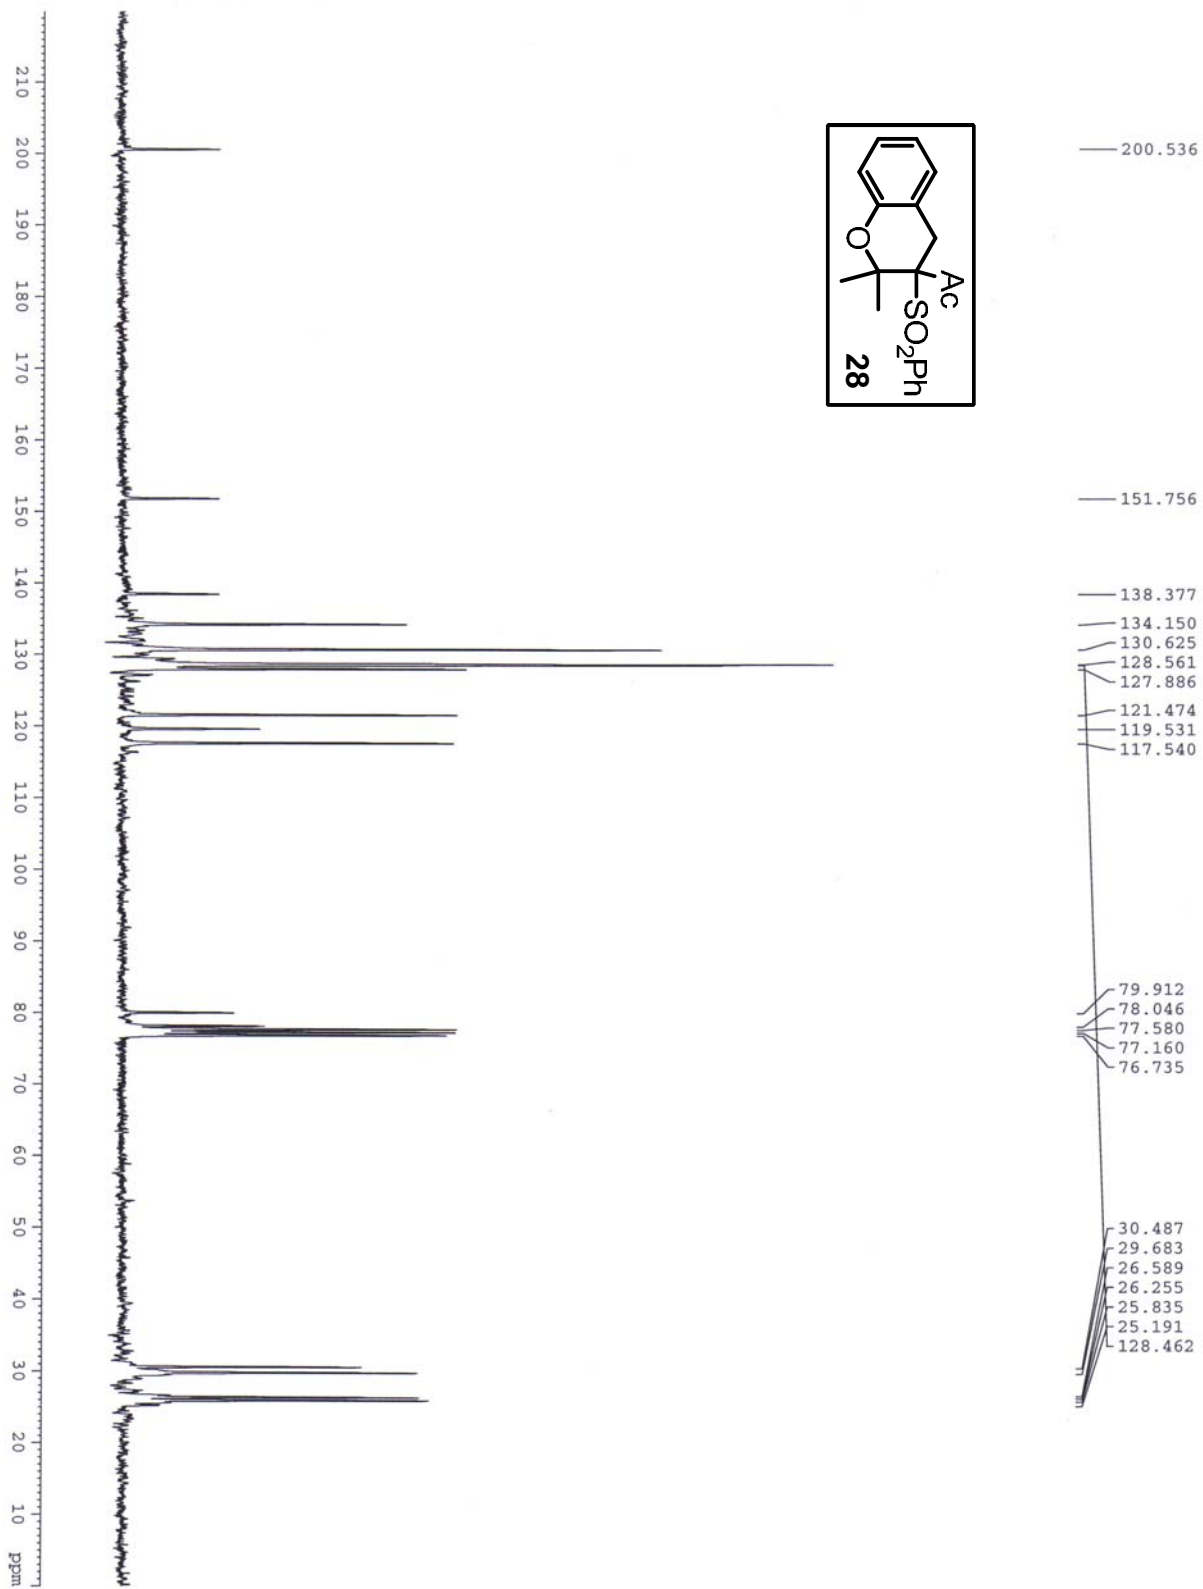

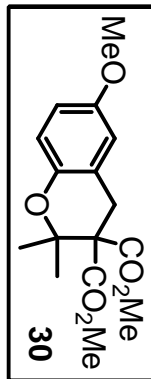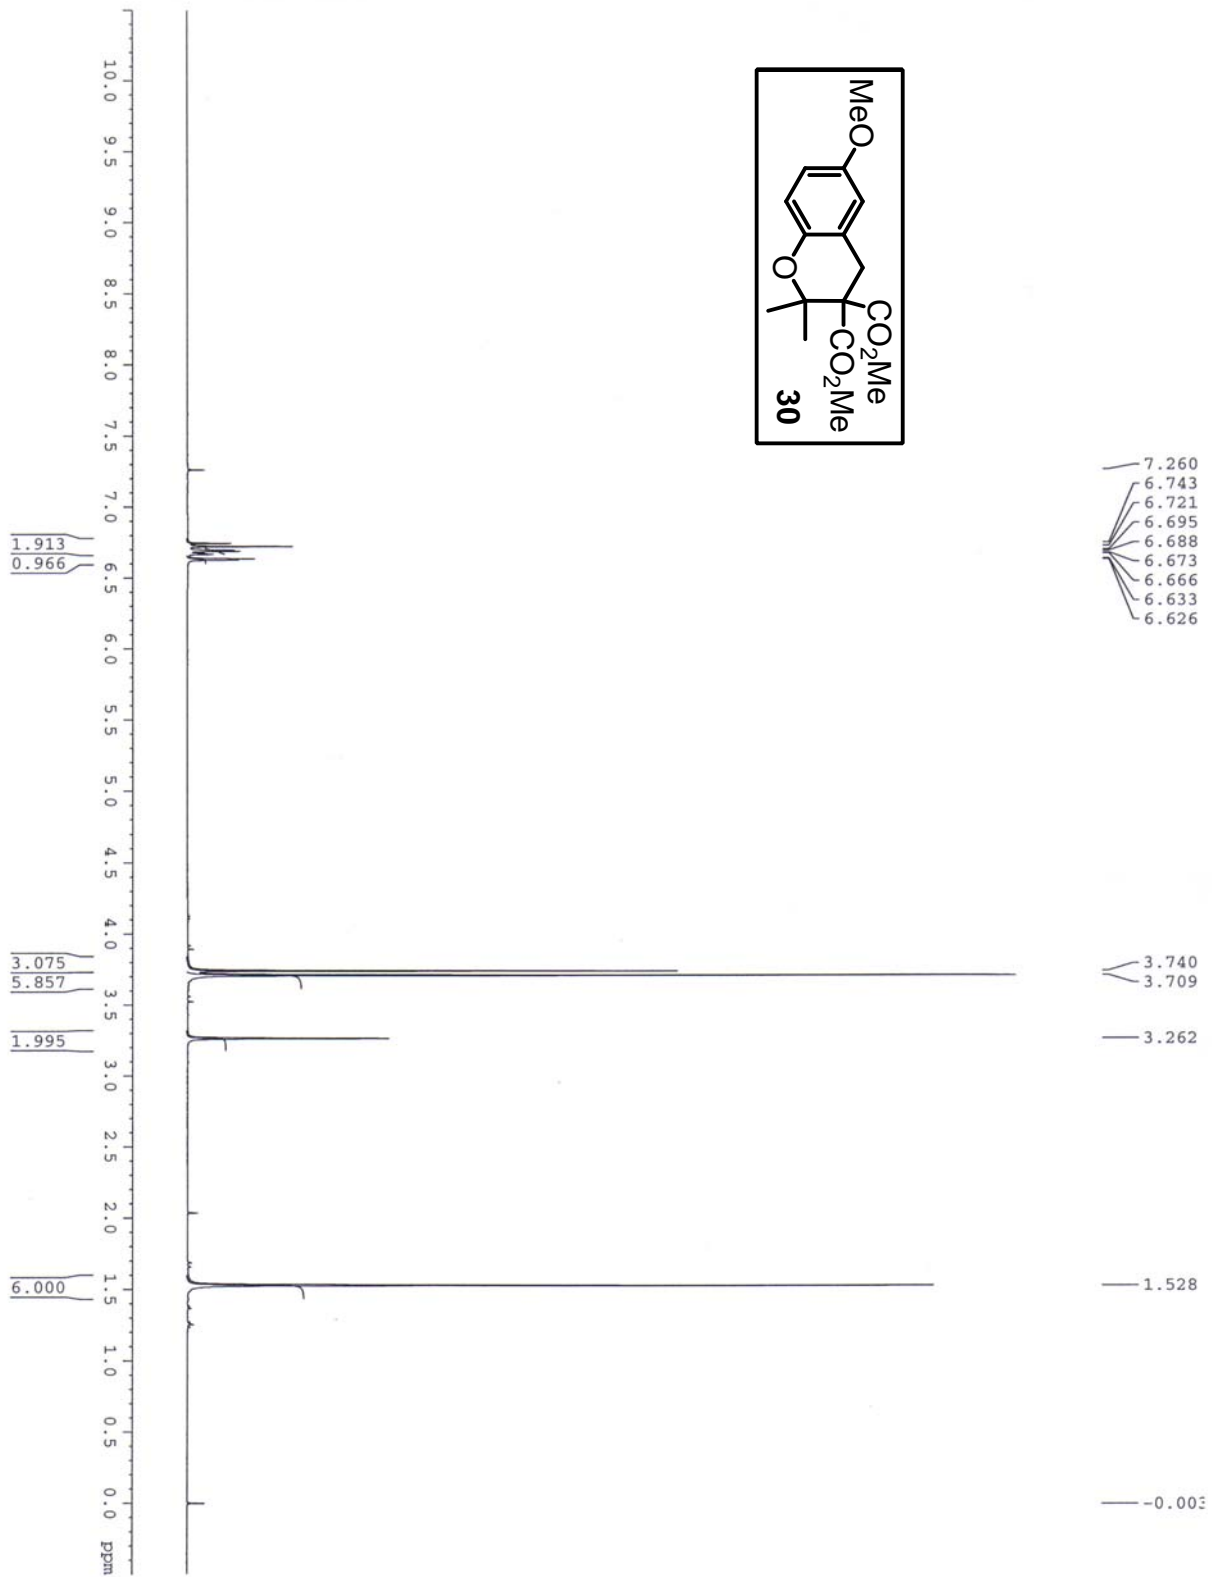

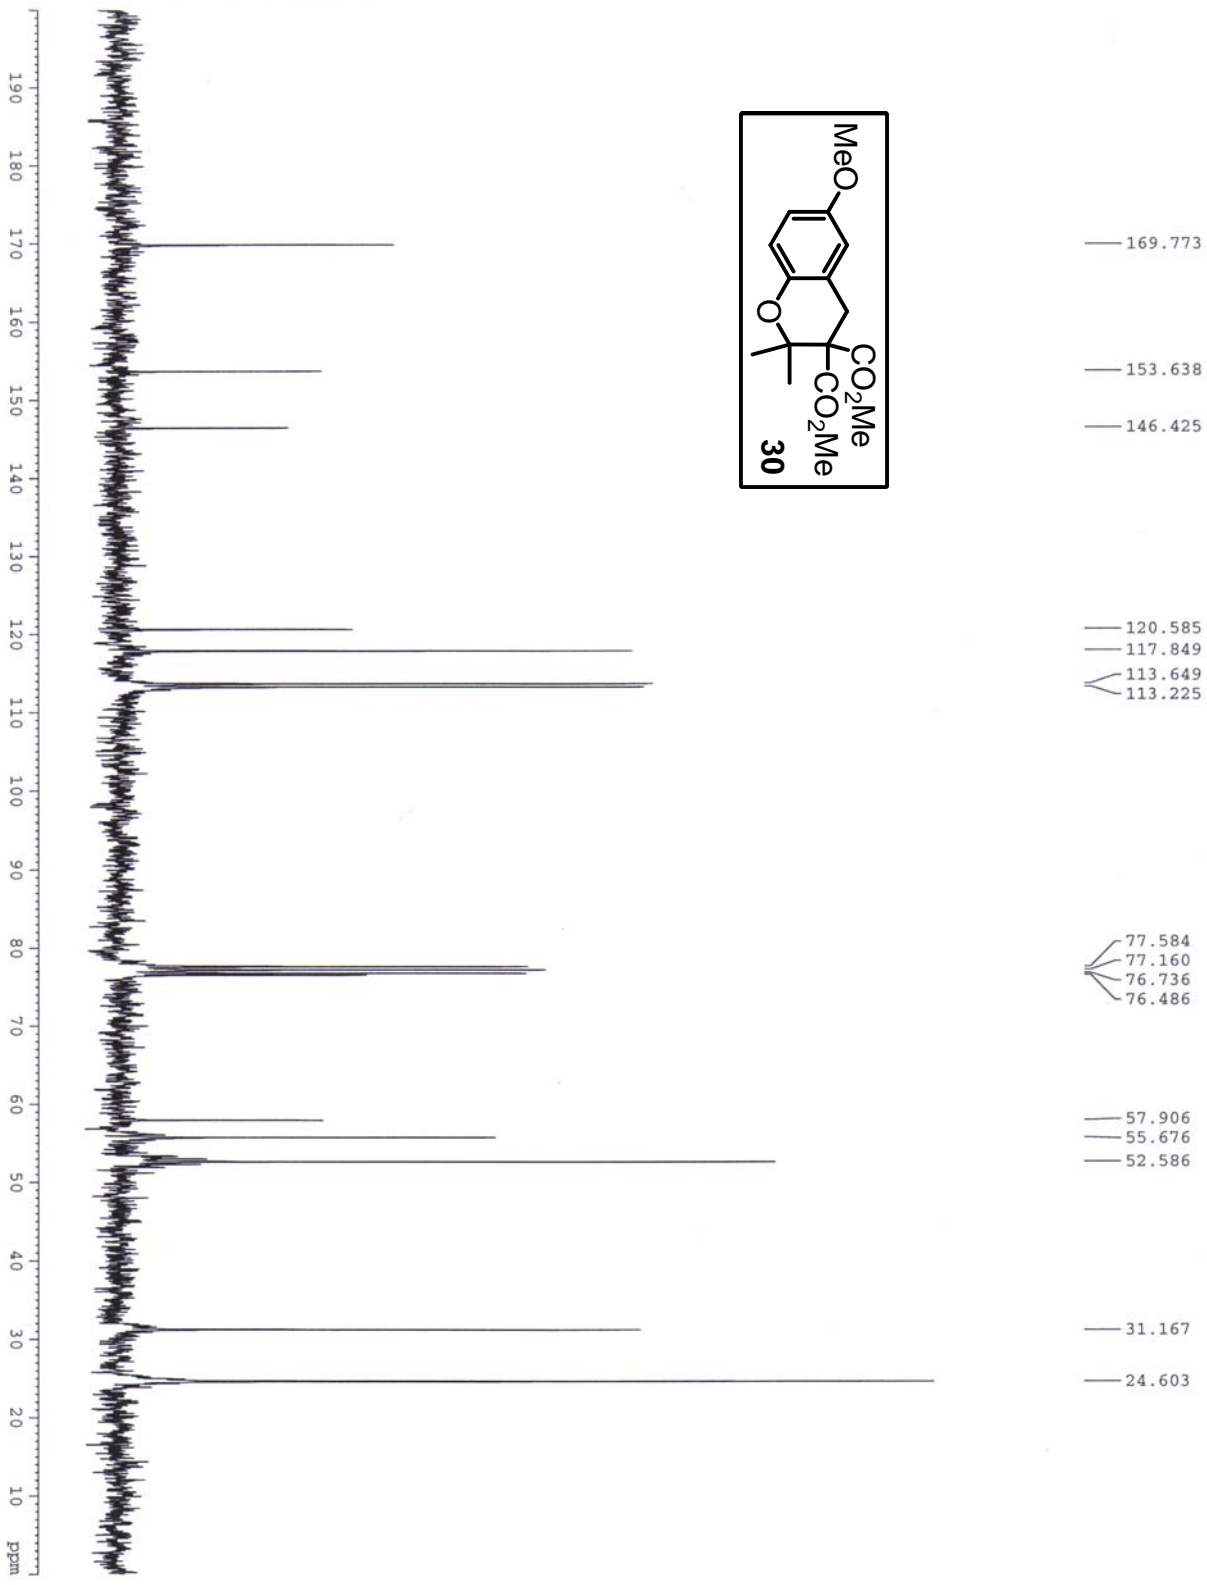

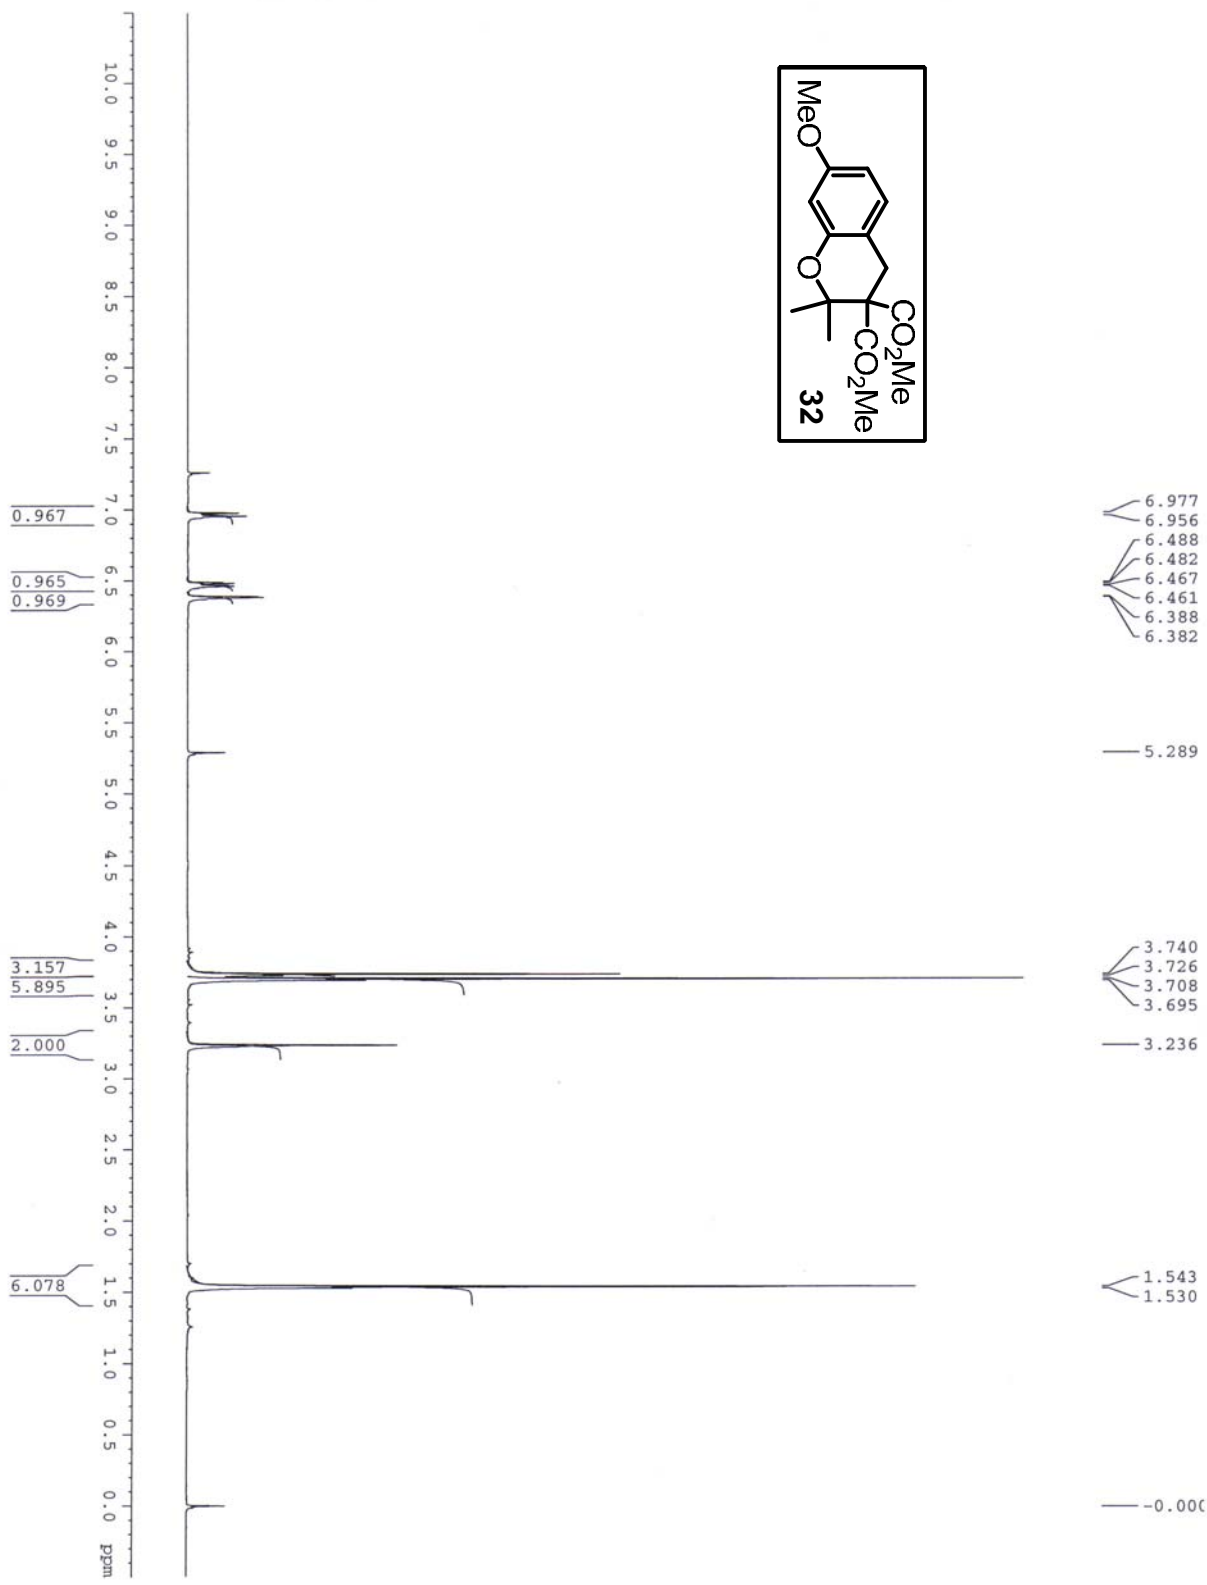

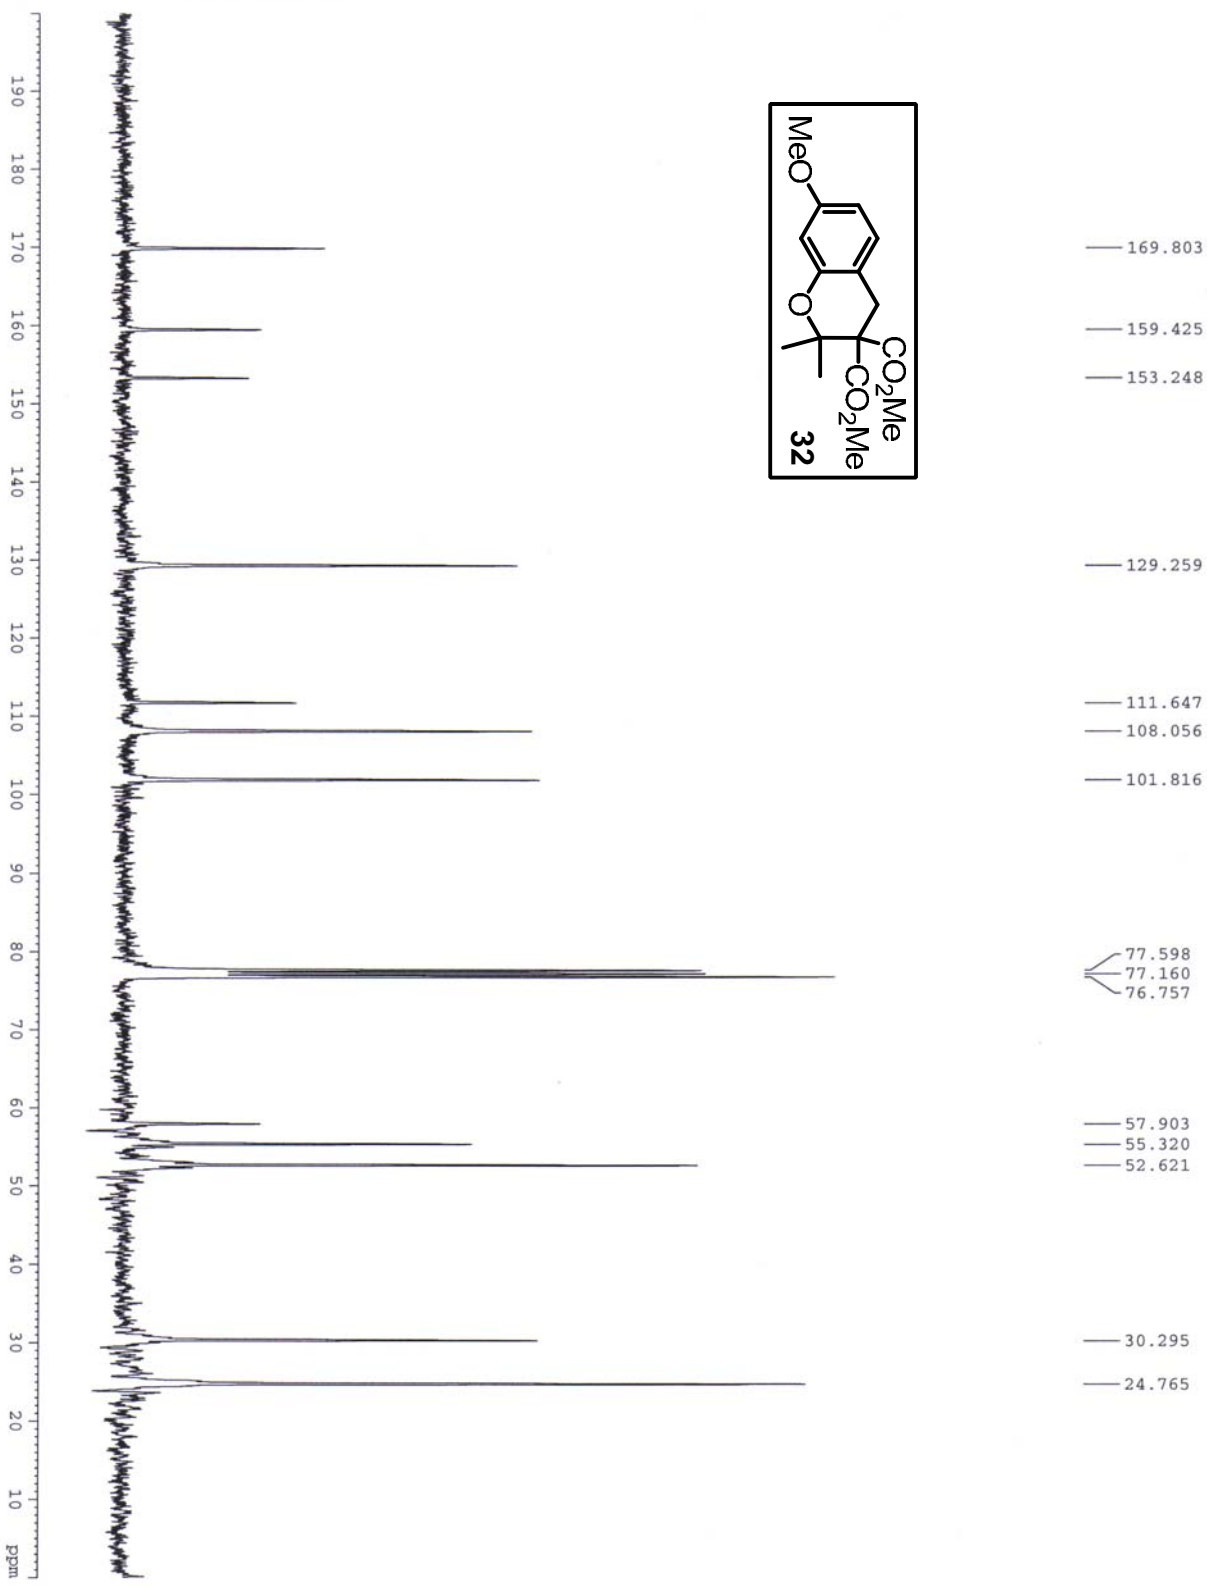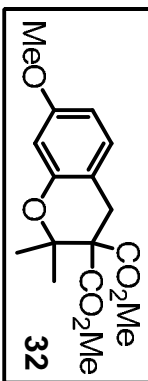

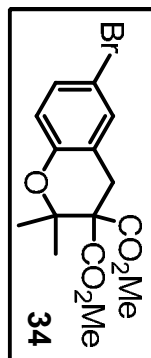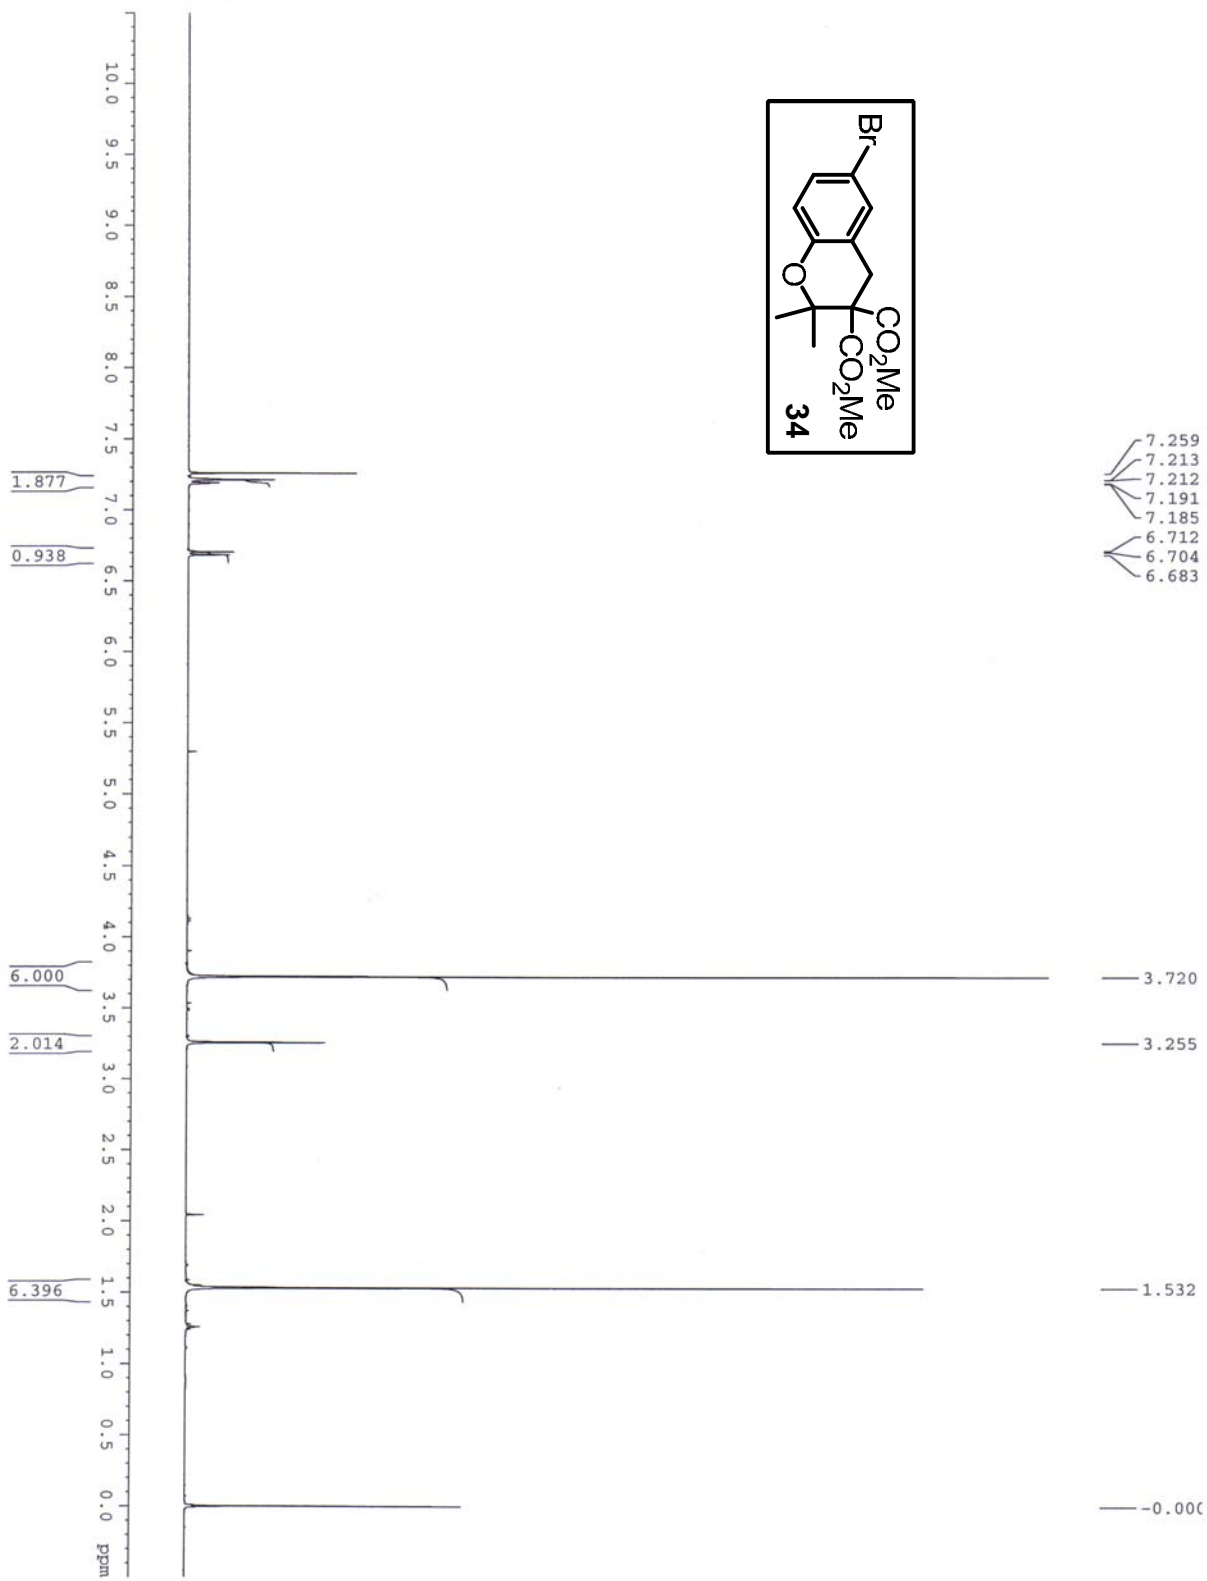



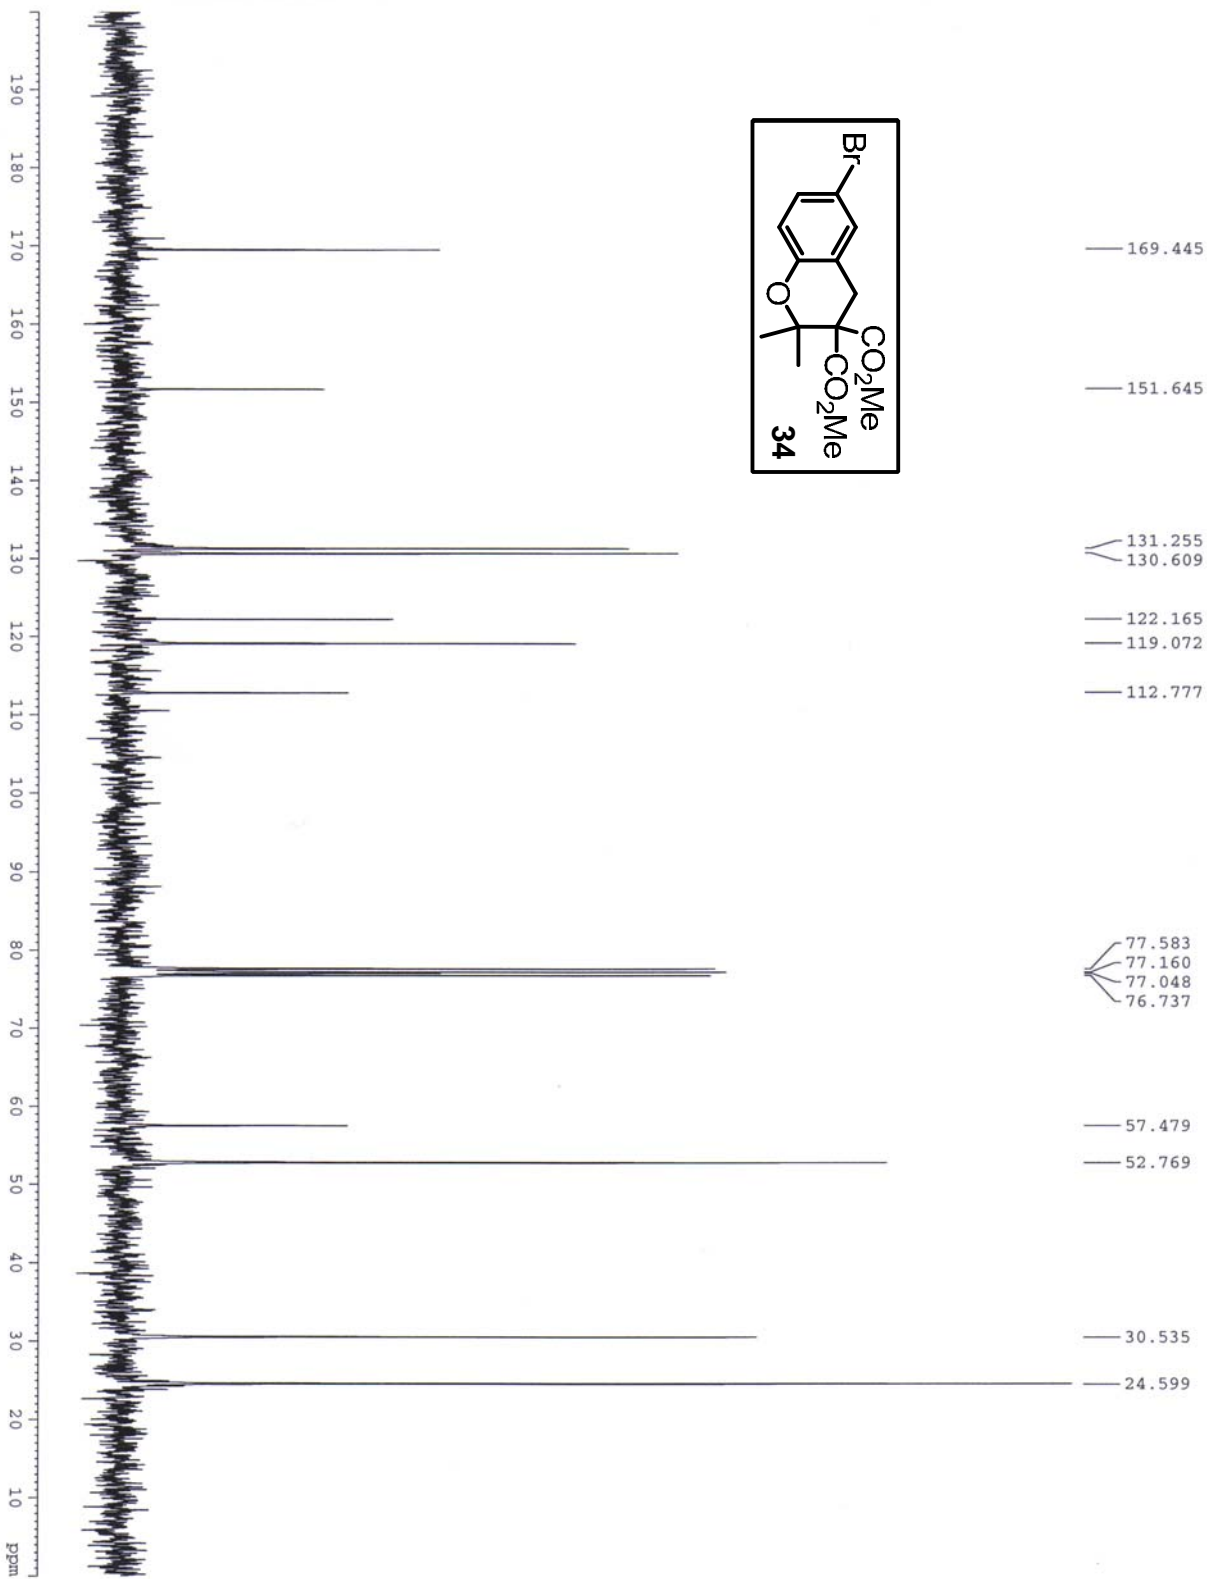

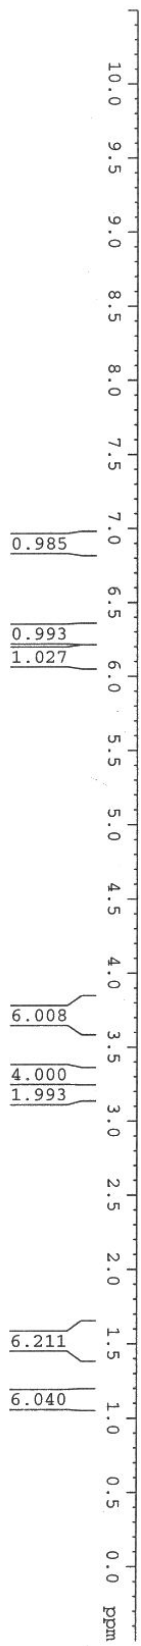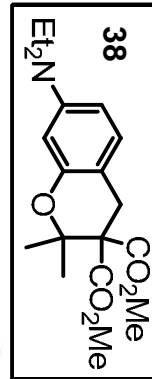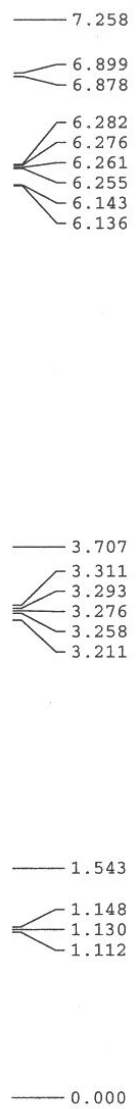

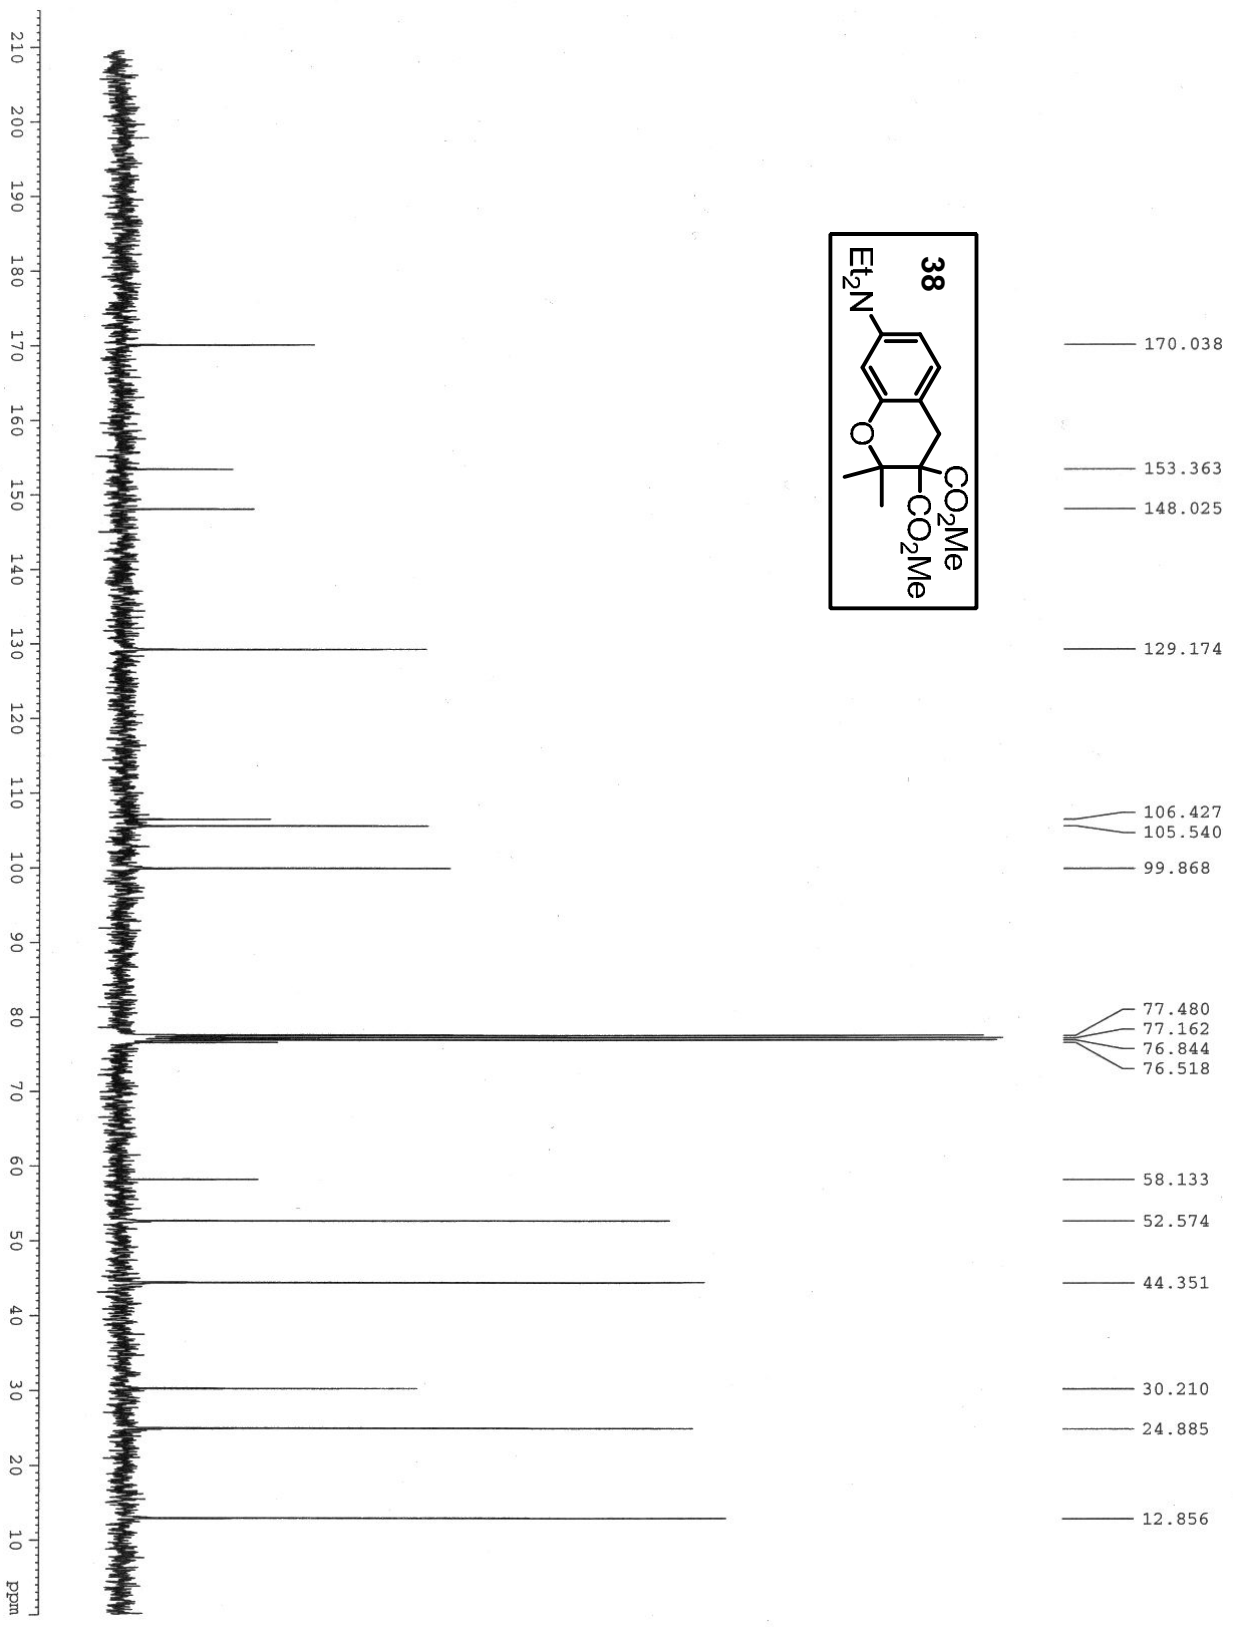

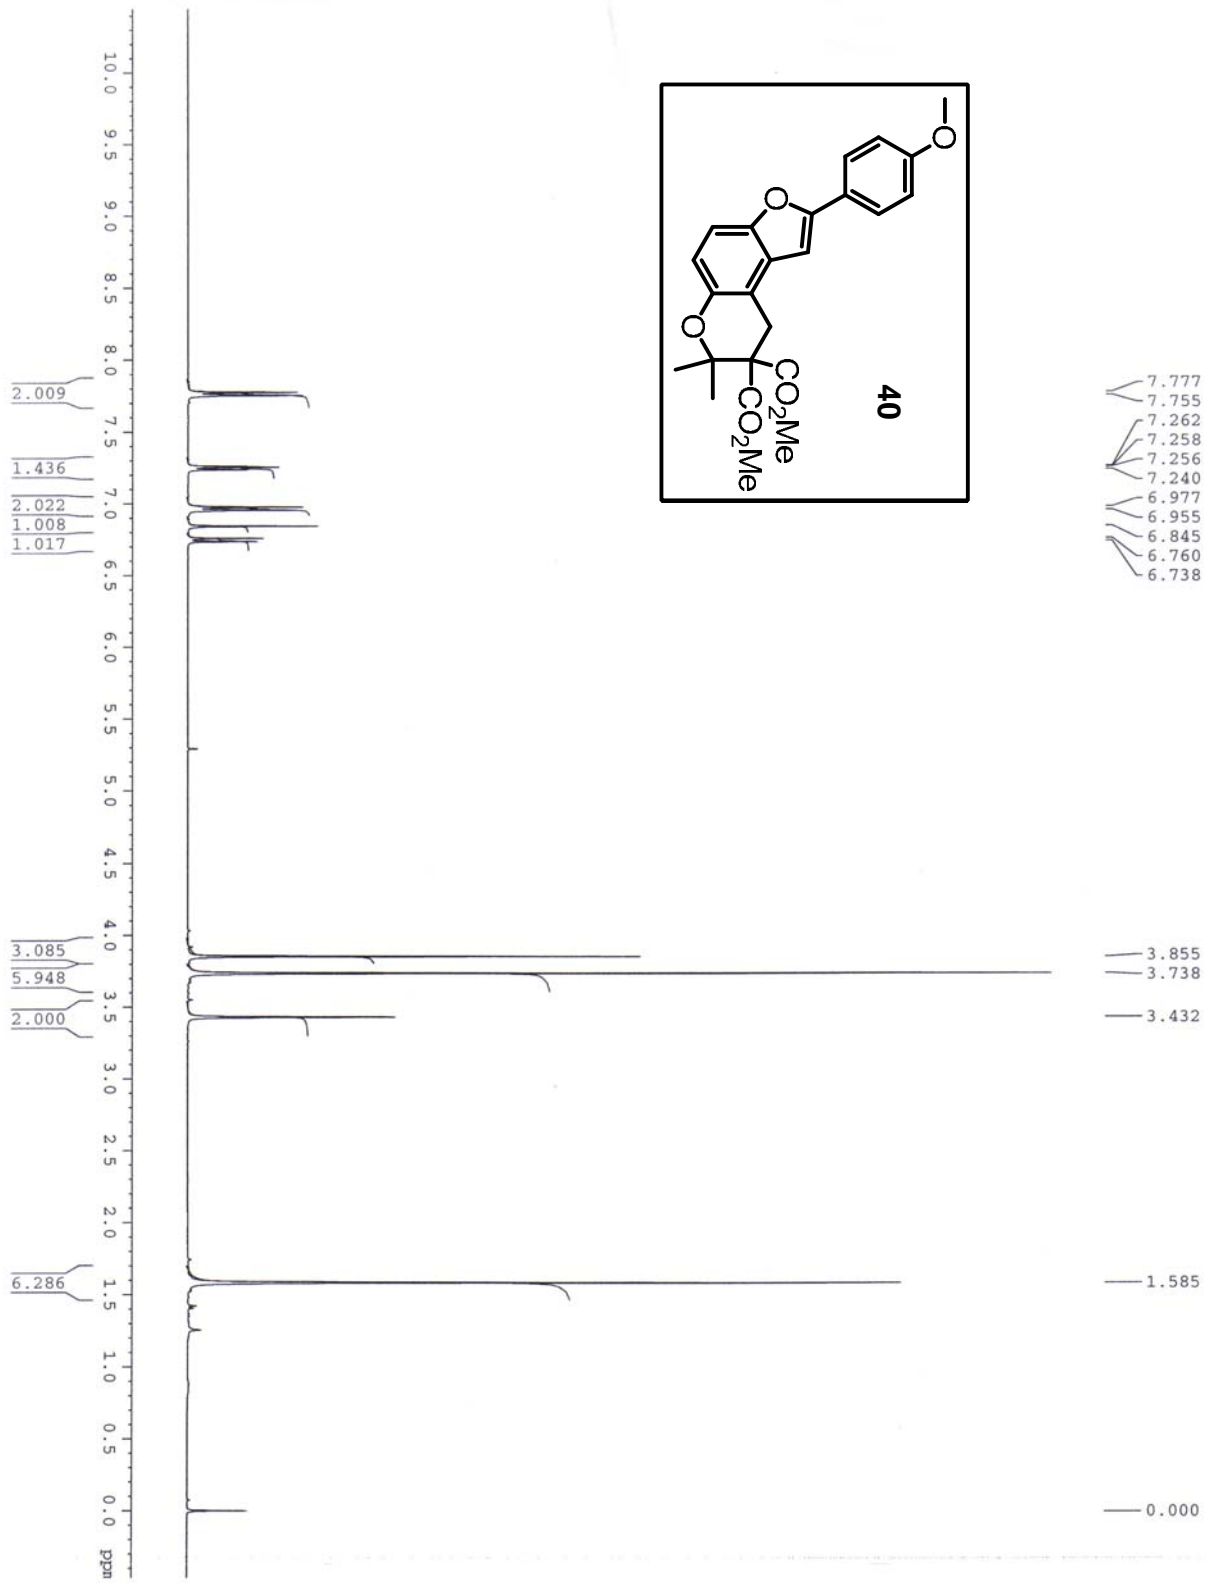

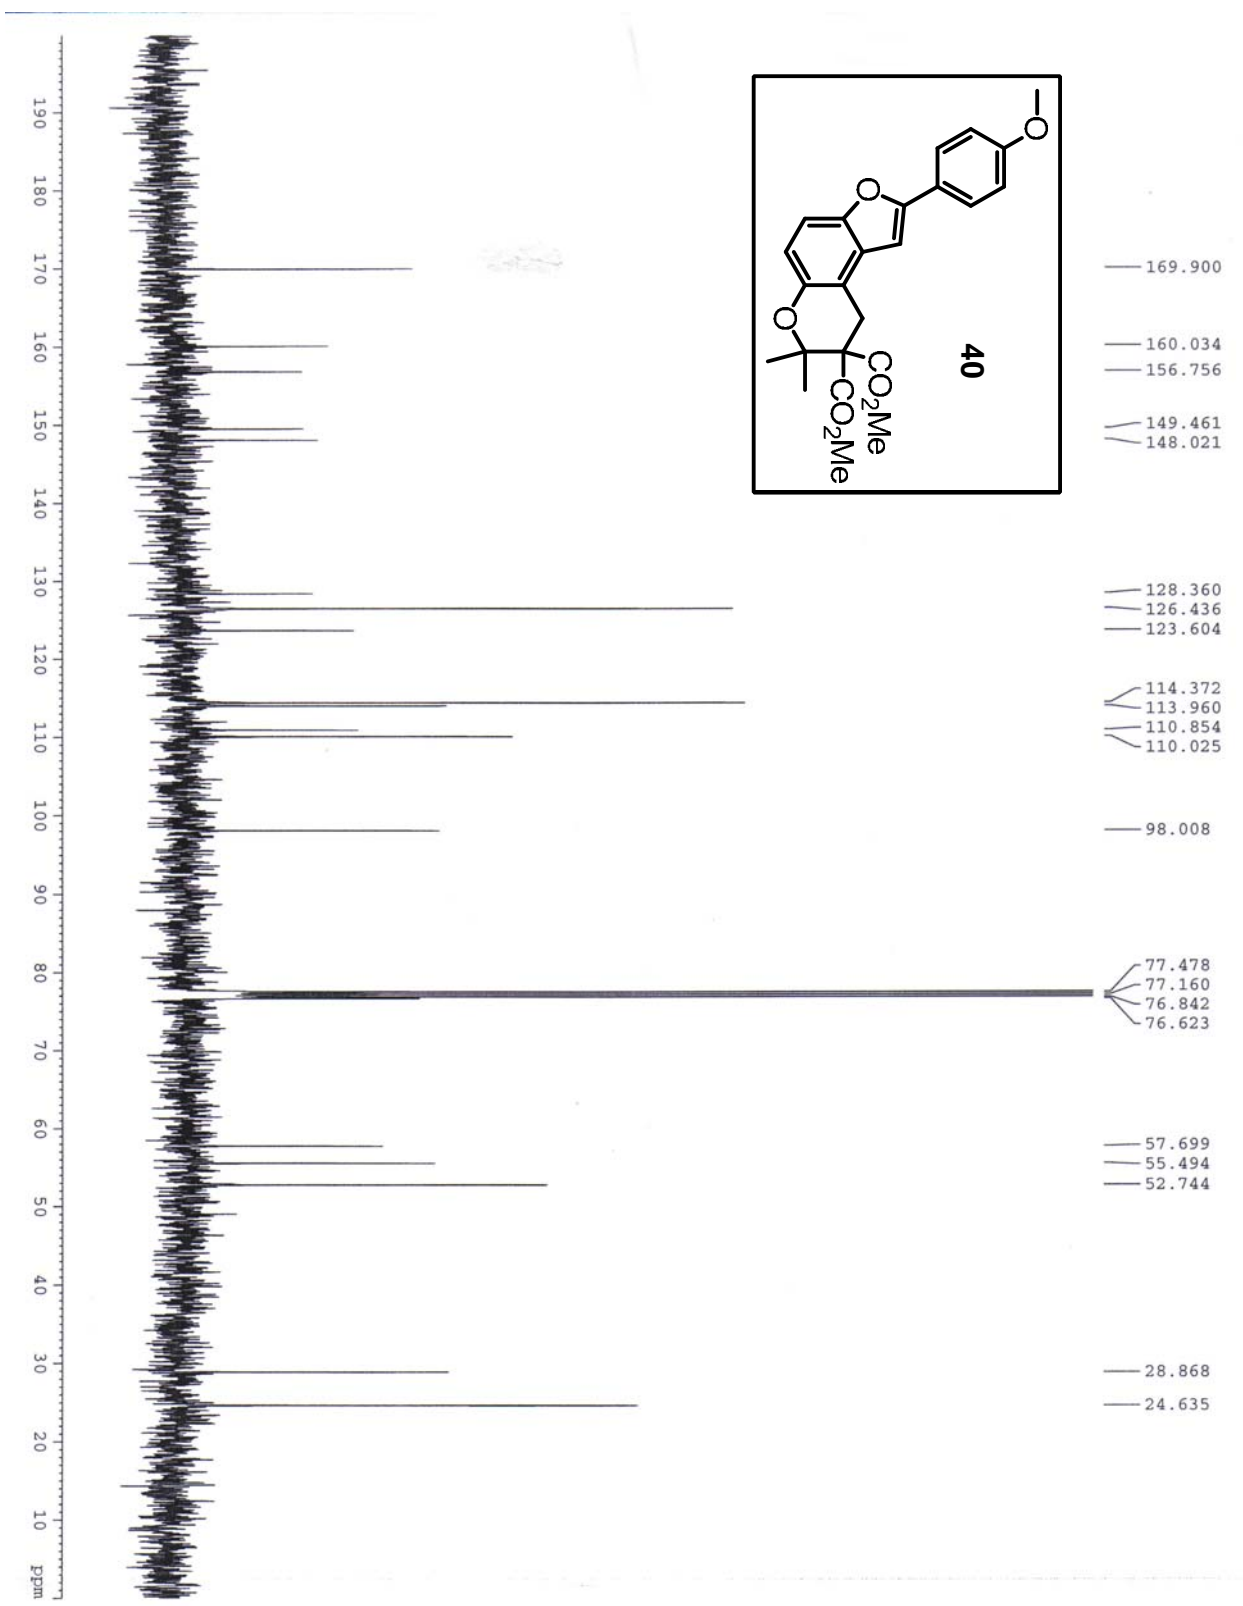

Supplement: NIHMS128191-supplement-2_si_002.pdf [file NIHMS128191-supplement-2_si_002.pdf]
